# Supplementary material for: Impaired mRNA splicing and proteostasis in preadipocytes in obesity-related metabolic disease
Source: eLife. 2021 Sep 21;10:e65996. doi: 10.7554/eLife.65996 (PMC8545398; doi:10.7554/eLife.65996)
Supplement: Figure 3—source data 1. [file elife-65996-fig3-data1.xlsx]

## Sheet: Target binding sites
Figure 3—Source data 1. Analysis of CLIP_Seq data (target binding sites and related pathways) from PRPF8-silenced HepG2 and K562 cells provided by The Encyclopedia of RNA Interactomes (ENCORI) database.
RBP	geneID	geneName	geneType	clusterNum	clipExpNum	clipIDnum	HepG2	K562	pancancerNum
PRPF8	ENSG00000127603	MACF1	protein_coding	144	4	217	NA	-0.809	0		LEGEND:
PRPF8	ENSG00000151914	DST	protein_coding	141	4	174	0.670	-0.730	0		clusterNum = Number of stacked regions among CLIP-seq datasets
PRPF8	ENSG00000173821	RNF213	protein_coding	116	4	193	0.530	-2007	0		clipExpNum = Number of supported CLIP-seq experiments
PRPF8	ENSG00000127481	UBR4	protein_coding	114	4	183	NA	-0.900	0		clipIDnum = Number of supported binding sites from CLIP-seq experiments
PRPF8	ENSG00000157106	SMG1	protein_coding	94	4	165	NA	-0.381	0		HepG2 = shRNA Screen of PRPF8 in HepG2
PRPF8	ENSG00000115414	FN1	protein_coding	91	4	148	-0.274	0.696	0		K562 = shRNA Screen of PRPF8 in K562
PRPF8	ENSG00000258472	AC005726.1	protein_coding	89	4	159	NA	NA	0		pancancerNum = Number of cancers (p-value <=0.05)
PRPF8	ENSG00000167548	KMT2D	protein_coding	85	4	144	NA	NA	0
PRPF8	ENSG00000173064	HECTD4	protein_coding	83	4	122	0.716	-0.697	0
PRPF8	ENSG00000126777	KTN1	protein_coding	82	4	128	NA	NA	0
PRPF8	ENSG00000196712	NF1	protein_coding	82	4	127	NA	-0.250	0
PRPF8	ENSG00000196914	ARHGEF12	protein_coding	81	4	131	0.417	-0.207	0
PRPF8	ENSG00000008710	PKD1	protein_coding	80	4	145	NA	NA	0
PRPF8	ENSG00000178104	PDE4DIP	protein_coding	80	4	122	NA	-0.245	0
PRPF8	ENSG00000198198	SZT2	protein_coding	76	4	114	0.793	-0.636	0
PRPF8	ENSG00000019144	PHLDB1	protein_coding	75	4	116	0.465	NA	0
PRPF8	ENSG00000086758	HUWE1	protein_coding	75	4	112	-0.620	-0.838	0
PRPF8	ENSG00000185024	BRF1	protein_coding	75	4	122	NA	NA	0
PRPF8	ENSG00000130702	LAMA5	protein_coding	74	4	128	NA	NA	0
PRPF8	ENSG00000142798	HSPG2	protein_coding	74	4	108	NA	-1859	0
PRPF8	ENSG00000173575	CHD2	protein_coding	74	4	132	0.251	0.164	0
PRPF8	ENSG00000197969	VPS13A	protein_coding	74	4	110	NA	-0.932	0
PRPF8	ENSG00000048707	VPS13D	protein_coding	73	4	112	NA	-0.723	0
PRPF8	ENSG00000123384	LRP1	protein_coding	73	2	112	NA	NA	0
PRPF8	ENSG00000055609	KMT2C	protein_coding	72	4	107	0.293	-0.348	0
PRPF8	ENSG00000115464	USP34	protein_coding	72	4	113	NA	-0.432	0
PRPF8	ENSG00000128731	HERC2	protein_coding	72	4	119	NA	-0.936	0
PRPF8	ENSG00000179532	DNHD1	protein_coding	70	4	97	NA	-1634	0
PRPF8	ENSG00000149311	ATM	protein_coding	69	4	99	NA	NA	0
PRPF8	ENSG00000084674	APOB	protein_coding	67	2	89	-0.394	NA	0
PRPF8	ENSG00000153187	HNRNPU	protein_coding	67	4	128	-0.577	NA	0
PRPF8	ENSG00000196739	COL27A1	protein_coding	67	2	101	-0.492	NA	0
PRPF8	ENSG00000115760	BIRC6	protein_coding	66	4	95	NA	-0.442	0
PRPF8	ENSG00000138688	KIAA1109	protein_coding	66	4	80	0.259	-0.526	0
PRPF8	ENSG00000167986	DDB1	protein_coding	66	4	125	NA	-0.307	0
PRPF8	ENSG00000115306	SPTBN1	protein_coding	64	4	108	0.268	1216	0
PRPF8	ENSG00000118058	KMT2A	protein_coding	64	4	119	NA	-0.358	0
PRPF8	ENSG00000178209	PLEC	protein_coding	64	4	116	NA	NA	0
PRPF8	ENSG00000253729	PRKDC	protein_coding	64	4	93	-0.557	-1176	0
PRPF8	ENSG00000080603	SRCAP	protein_coding	63	4	99	NA	NA	0
PRPF8	ENSG00000112159	MDN1	protein_coding	63	4	86	-0.811	-0.794	0
PRPF8	ENSG00000137642	SORL1	protein_coding	63	2	83	-0.524	NA	0
PRPF8	ENSG00000185658	BRWD1	protein_coding	63	4	106	0.424	NA	0
PRPF8	ENSG00000204469	PRRC2A	protein_coding	63	4	119	NA	NA	0
PRPF8	ENSG00000125730	C3	protein_coding	62	4	94	0.520	-1164	0
PRPF8	ENSG00000117523	PRRC2C	protein_coding	61	4	92	-0.397	-0.469	0
PRPF8	ENSG00000138759	FRAS1	protein_coding	61	2	83	NA	NA	0
PRPF8	ENSG00000154358	OBSCN	protein_coding	61	2	70	2780	NA	0
PRPF8	ENSG00000196535	MYO18A	protein_coding	61	4	100	0.568	-0.346	0
PRPF8	ENSG00000197102	DYNC1H1	protein_coding	61	4	115	NA	-1834	0
PRPF8	ENSG00000197386	HTT	protein_coding	61	4	97	0.534	NA	0
PRPF8	ENSG00000266714	MYO15B	protein_coding	61	4	79	NA	NA	0
PRPF8	ENSG00000054654	SYNE2	protein_coding	60	2	67	NA	NA	0
PRPF8	ENSG00000174231	PRPF8	protein_coding	60	4	108	-1767	-0.870	0
PRPF8	ENSG00000182670	TTC3	protein_coding	60	4	83	-0.777	-0.745	0
PRPF8	ENSG00000243156	MICAL3	protein_coding	60	4	90	0.600	-0.384	0
PRPF8	ENSG00000153914	SREK1	protein_coding	59	4	97	0.737	NA	0
PRPF8	ENSG00000165219	GAPVD1	protein_coding	59	4	92	NA	NA	0
PRPF8	ENSG00000075539	FRYL	protein_coding	58	4	82	NA	NA	0
PRPF8	ENSG00000109685	NSD2	protein_coding	58	4	106	-1044	-0.690	0
PRPF8	ENSG00000127914	AKAP9	protein_coding	58	4	80	NA	-0.839	0
PRPF8	ENSG00000143126	CELSR2	protein_coding	58	4	82	-1095	NA	0
PRPF8	ENSG00000152767	FARP1	protein_coding	58	2	89	NA	NA	0
PRPF8	ENSG00000204843	DCTN1	protein_coding	58	4	97	NA	-0.266	0
PRPF8	ENSG00000275023	MLLT6	protein_coding	58	4	111	-0.263	-0.846	0
PRPF8	ENSG00000071054	MAP4K4	protein_coding	57	4	85	-0.154	-0.395	0
PRPF8	ENSG00000074755	ZZEF1	protein_coding	57	4	89	0.613	NA	0
PRPF8	ENSG00000152818	UTRN	protein_coding	57	4	71	-0.610	NA	0
PRPF8	ENSG00000153107	ANAPC1	protein_coding	57	4	95	-0.950	-0.378	0
PRPF8	ENSG00000174197	MGA	protein_coding	57	4	83	NA	-0.224	0
PRPF8	ENSG00000280987	MATR3	protein_coding	57	4	109	NA	NA	0
PRPF8	ENSG00000072121	ZFYVE26	protein_coding	56	4	80	NA	NA	0
PRPF8	ENSG00000078674	PCM1	protein_coding	56	4	81	-0.604	-0.518	0
PRPF8	ENSG00000115677	HDLBP	protein_coding	56	4	94	-0.704	-0.245	0
PRPF8	ENSG00000123636	BAZ2B	protein_coding	56	4	76	0.991	NA	0
PRPF8	ENSG00000131051	RBM39	protein_coding	56	4	111	NA	0.430	0
PRPF8	ENSG00000141979	AC008764.1	protein_coding	56	4	83	NA	NA	0
PRPF8	ENSG00000163625	WDFY3	protein_coding	56	4	77	NA	NA	0
PRPF8	ENSG00000172890	NADSYN1	protein_coding	56	4	90	NA	-0.833	0
PRPF8	ENSG00000250151	ARPC4-TTLL3	protein_coding	56	4	97	NA	NA	0
PRPF8	ENSG00000282034	AC106886.5	protein_coding	56	4	89	NA	NA	0
PRPF8	ENSG00000010244	ZNF207	protein_coding	55	4	120	NA	0.178	0
PRPF8	ENSG00000060237	WNK1	protein_coding	55	4	81	-0.539	-0.612	0
PRPF8	ENSG00000103657	HERC1	protein_coding	55	4	74	-0.478	-1006	0
PRPF8	ENSG00000126883	NUP214	protein_coding	55	4	89	NA	-0.189	0
PRPF8	ENSG00000141367	CLTC	protein_coding	55	4	87	NA	NA	0
PRPF8	ENSG00000145734	BDP1	protein_coding	55	4	70	0.393	NA	0
PRPF8	ENSG00000146414	SHPRH	protein_coding	55	4	89	NA	-0.777	0
PRPF8	ENSG00000169696	ASPSCR1	protein_coding	55	4	93	NA	0.696	0
PRPF8	ENSG00000171634	BPTF	protein_coding	55	4	80	NA	NA	0
PRPF8	ENSG00000038219	BOD1L1	protein_coding	54	4	73	NA	0.382	0
PRPF8	ENSG00000115548	KDM3A	protein_coding	54	4	94	NA	-0.727	0
PRPF8	ENSG00000122966	CIT	protein_coding	54	4	91	-2222	-1160	0
PRPF8	ENSG00000135968	GCC2	protein_coding	54	4	74	NA	NA	0
PRPF8	ENSG00000144028	SNRNP200	protein_coding	54	4	90	0.272	-0.141	0
PRPF8	ENSG00000159433	STARD9	protein_coding	54	4	79	NA	NA	0
PRPF8	ENSG00000176915	ANKLE2	protein_coding	54	4	88	NA	0.359	0
PRPF8	ENSG00000188157	AGRN	protein_coding	54	4	95	NA	NA	0
PRPF8	ENSG00000196367	TRRAP	protein_coding	54	4	83	-0.282	-0.413	0
PRPF8	ENSG00000278259	MYO19	protein_coding	54	4	94	-1006	-0.920	0
PRPF8	ENSG00000278540	ACACA	protein_coding	54	4	85	-0.241	-1237	0
PRPF8	ENSG00000083312	TNPO1	protein_coding	53	4	87	NA	NA	0
PRPF8	ENSG00000092148	HECTD1	protein_coding	53	4	86	-0.223	NA	0
PRPF8	ENSG00000100354	TNRC6B	protein_coding	53	4	82	NA	NA	0
PRPF8	ENSG00000141524	TMC6	protein_coding	53	4	116	NA	NA	0
PRPF8	ENSG00000146263	MMS22L	protein_coding	53	4	74	-1250	NA	0
PRPF8	ENSG00000147459	DOCK5	protein_coding	53	2	75	0.332	NA	0
PRPF8	ENSG00000038382	TRIO	protein_coding	52	2	76	NA	0.818	0
PRPF8	ENSG00000068878	PSME4	protein_coding	52	4	76	NA	NA	0
PRPF8	ENSG00000105221	AKT2	protein_coding	52	4	98	NA	NA	0
PRPF8	ENSG00000129003	VPS13C	protein_coding	52	4	72	0.834	-0.984	0
PRPF8	ENSG00000136068	FLNB	protein_coding	52	4	84	0.687	-1094	0
PRPF8	ENSG00000160305	DIP2A	protein_coding	52	4	98	0.290	-1154	0
PRPF8	ENSG00000169710	FASN	protein_coding	52	4	90	NA	NA	0
PRPF8	ENSG00000170776	AKAP13	protein_coding	52	2	69	1005	2571	0
PRPF8	ENSG00000174437	ATP2A2	protein_coding	52	4	107	-0.453	0.115	0
PRPF8	ENSG00000003756	RBM5	protein_coding	51	4	90	0.391	-0.306	0
PRPF8	ENSG00000054523	KIF1B	protein_coding	51	4	79	NA	-0.651	0
PRPF8	ENSG00000065361	ERBB3	protein_coding	51	4	75	-0.976	-2257	0
PRPF8	ENSG00000076928	ARHGEF1	protein_coding	51	4	78	NA	NA	0
PRPF8	ENSG00000113712	CSNK1A1	protein_coding	51	4	87	NA	0.252	0
PRPF8	ENSG00000114857	NKTR	protein_coding	51	4	107	0.386	-0.657	0
PRPF8	ENSG00000124942	AHNAK	protein_coding	51	4	77	-0.425	-1570	0
PRPF8	ENSG00000125107	CNOT1	protein_coding	51	4	87	-0.420	-0.200	0
PRPF8	ENSG00000134744	ZCCHC11	protein_coding	51	4	76	NA	-0.480	0
PRPF8	ENSG00000157625	TAB3	protein_coding	51	4	75	0.615	-0.309	0
PRPF8	ENSG00000177200	CHD9	protein_coding	51	4	71	0.258	NA	0
PRPF8	ENSG00000185513	L3MBTL1	protein_coding	51	4	93	NA	-1368	0
PRPF8	ENSG00000270181	BIVM-ERCC5	protein_coding	51	4	75	NA	NA	0
PRPF8	ENSG00000068654	POLR1A	protein_coding	50	4	97	NA	NA	0
PRPF8	ENSG00000079432	CIC	protein_coding	50	4	86	NA	0.669	0
PRPF8	ENSG00000102287	GABRE	protein_coding	50	4	93	-0.615	-1581	0
PRPF8	ENSG00000119969	HELLS	protein_coding	50	4	69	-1844	NA	0
PRPF8	ENSG00000130396	AFDN	protein_coding	50	4	88	0.287	-0.624	0
PRPF8	ENSG00000153827	TRIP12	protein_coding	50	4	78	0.327	NA	0
PRPF8	ENSG00000160551	TAOK1	protein_coding	50	4	86	NA	NA	0
PRPF8	ENSG00000163714	U2SURP	protein_coding	50	4	83	NA	NA	0
PRPF8	ENSG00000168172	HOOK3	protein_coding	50	4	70	-0.197	-1271	0
PRPF8	ENSG00000189056	RELN	protein_coding	50	4	69	0.196	-0.766	0
PRPF8	ENSG00000204256	BRD2	protein_coding	50	4	88	-0.273	0.717	0
PRPF8	ENSG00000234857	HNRNPUL2-BSCL2	protein_coding	50	4	86	-0.509	-0.292	0
PRPF8	ENSG00000254995	STX16-NPEPL1	protein_coding	50	4	88	NA	NA	0
PRPF8	ENSG00000258984	UBE2F-SCLY	protein_coding	50	4	82	NA	3547	0
PRPF8	ENSG00000284057	AP001273.2	protein_coding	50	4	91	NA	NA	0
PRPF8	ENSG00000029363	BCLAF1	protein_coding	49	4	86	NA	1016	0
PRPF8	ENSG00000038358	EDC4	protein_coding	49	4	83	0.431	0.409	0
PRPF8	ENSG00000078142	PIK3C3	protein_coding	49	4	76	NA	NA	0
PRPF8	ENSG00000114867	EIF4G1	protein_coding	49	4	85	-1069	-0.135	0
PRPF8	ENSG00000115524	SF3B1	protein_coding	49	4	75	0.316	0.337	0
PRPF8	ENSG00000129566	TEP1	protein_coding	49	4	65	0.784	NA	0
PRPF8	ENSG00000140400	MAN2C1	protein_coding	49	4	97	NA	NA	0
PRPF8	ENSG00000141027	NCOR1	protein_coding	49	4	73	NA	-0.405	0
PRPF8	ENSG00000141252	VPS53	protein_coding	49	4	75	-0.279	NA	0
PRPF8	ENSG00000144426	NBEAL1	protein_coding	49	4	76	0.671	NA	0
PRPF8	ENSG00000147162	OGT	protein_coding	49	4	83	NA	-0.978	0
PRPF8	ENSG00000153201	RANBP2	protein_coding	49	4	71	NA	NA	0
PRPF8	ENSG00000163539	CLASP2	protein_coding	49	4	75	-0.368	-0.513	0
PRPF8	ENSG00000196591	HDAC2	protein_coding	49	4	97	NA	NA	0
PRPF8	ENSG00000196924	FLNA	protein_coding	49	4	96	NA	NA	0
PRPF8	ENSG00000197081	IGF2R	protein_coding	49	4	76	-0.448	-0.326	0
PRPF8	ENSG00000198089	SFI1	protein_coding	49	4	81	NA	-1672	0
PRPF8	ENSG00000198563	DDX39B	protein_coding	49	4	106	NA	NA	0
PRPF8	ENSG00000204842	ATXN2	protein_coding	49	4	82	NA	-0.946	0
PRPF8	ENSG00000254870	ATP6V1G2-DDX39B	protein_coding	49	4	106	-1291	NA	0
PRPF8	ENSG00000072501	SMC1A	protein_coding	48	4	77	-1181	-0.841	0
PRPF8	ENSG00000076108	BAZ2A	protein_coding	48	4	73	0.248	-0.274	0
PRPF8	ENSG00000087460	GNAS	protein_coding	48	4	110	NA	NA	0
PRPF8	ENSG00000122566	HNRNPA2B1	protein_coding	48	4	102	-0.816	NA	0
PRPF8	ENSG00000124782	RREB1	protein_coding	48	4	79	NA	-0.326	0
PRPF8	ENSG00000134824	FADS2	protein_coding	48	4	65	-0.954	-0.701	0
PRPF8	ENSG00000146830	GIGYF1	protein_coding	48	4	88	-0.381	NA	0
PRPF8	ENSG00000149091	DGKZ	protein_coding	48	4	84	0.463	0.639	0
PRPF8	ENSG00000149428	HYOU1	protein_coding	48	4	72	-0.928	NA	0
PRPF8	ENSG00000153113	CAST	protein_coding	48	4	72	0.399	NA	0
PRPF8	ENSG00000161996	WDR90	protein_coding	48	4	68	NA	-0.992	0
PRPF8	ENSG00000162402	USP24	protein_coding	48	4	65	NA	-0.408	0
PRPF8	ENSG00000197694	SPTAN1	protein_coding	48	4	64	0.167	0.613	0
PRPF8	ENSG00000255508	AP002990.1	protein_coding	48	4	83	NA	NA	0
PRPF8	ENSG00000272333	KMT2B	protein_coding	48	4	76	0.368	NA	0
PRPF8	ENSG00000005810	MYCBP2	protein_coding	47	4	60	NA	-0.456	0
PRPF8	ENSG00000007202	KIAA0100	protein_coding	47	4	80	NA	-0.469	0
PRPF8	ENSG00000087365	SF3B2	protein_coding	47	4	101	NA	0.598	0
PRPF8	ENSG00000089053	ANAPC5	protein_coding	47	4	87	-0.274	-0.228	0
PRPF8	ENSG00000102908	NFAT5	protein_coding	47	4	74	NA	NA	0
PRPF8	ENSG00000104517	UBR5	protein_coding	47	4	81	-0.312	-0.486	0
PRPF8	ENSG00000105429	MEGF8	protein_coding	47	4	59	NA	-0.773	0
PRPF8	ENSG00000105443	CYTH2	protein_coding	47	4	79	NA	NA	0
PRPF8	ENSG00000128829	EIF2AK4	protein_coding	47	4	74	0.659	-0.419	0
PRPF8	ENSG00000129292	PHF20L1	protein_coding	47	4	68	0.405	NA	0
PRPF8	ENSG00000133030	MPRIP	protein_coding	47	4	82	NA	NA	0
PRPF8	ENSG00000138674	SEC31A	protein_coding	47	4	82	-0.207	NA	0
PRPF8	ENSG00000139436	GIT2	protein_coding	47	4	77	0.360	-0.506	0
PRPF8	ENSG00000148634	HERC4	protein_coding	47	4	78	NA	NA	0
PRPF8	ENSG00000182095	TNRC18	protein_coding	47	4	74	NA	0.688	0
PRPF8	ENSG00000185842	DNAH14	protein_coding	47	4	69	NA	NA	0
PRPF8	ENSG00000186635	ARAP1	protein_coding	47	4	80	NA	NA	0
PRPF8	ENSG00000007047	MARK4	protein_coding	46	4	77	NA	-0.934	0
PRPF8	ENSG00000008294	SPAG9	protein_coding	46	4	69	NA	-0.268	0
PRPF8	ENSG00000080345	RIF1	protein_coding	46	4	86	-0.473	NA	0
PRPF8	ENSG00000102710	SUPT20H	protein_coding	46	4	67	NA	-0.529	0
PRPF8	ENSG00000103335	PIEZO1	protein_coding	46	4	73	NA	NA	0
PRPF8	ENSG00000109111	SUPT6H	protein_coding	46	4	81	NA	NA	0
PRPF8	ENSG00000112200	ZNF451	protein_coding	46	4	75	0.451	NA	0
PRPF8	ENSG00000114270	COL7A1	protein_coding	46	4	57	0.483	NA	0
PRPF8	ENSG00000124920	MYRF	protein_coding	46	4	78	0.669	-0.731	0
PRPF8	ENSG00000132694	ARHGEF11	protein_coding	46	4	60	NA	0.662	0
PRPF8	ENSG00000141736	ERBB2	protein_coding	46	4	72	-0.584	-1117	0
PRPF8	ENSG00000157741	UBN2	protein_coding	46	4	78	NA	NA	0
PRPF8	ENSG00000164327	RICTOR	protein_coding	46	4	68	NA	NA	0
PRPF8	ENSG00000165494	PCF11	protein_coding	46	4	67	0.314	0.254	0
PRPF8	ENSG00000204120	GIGYF2	protein_coding	46	4	76	NA	NA	0
PRPF8	ENSG00000256861	AC048338.1	protein_coding	46	4	75	NA	NA	0
PRPF8	ENSG00000070814	TCOF1	protein_coding	45	4	80	-0.746	NA	0
PRPF8	ENSG00000072609	CHFR	protein_coding	45	4	72	0.865	NA	0
PRPF8	ENSG00000083857	FAT1	protein_coding	45	4	60	-0.376	-0.461	0
PRPF8	ENSG00000089154	GCN1	protein_coding	45	4	67	NA	-0.509	0
PRPF8	ENSG00000089280	FUS	protein_coding	45	4	95	NA	0.446	0
PRPF8	ENSG00000090060	PAPOLA	protein_coding	45	4	70	-0.446	NA	0
PRPF8	ENSG00000100201	DDX17	protein_coding	45	4	85	NA	-0.814	0
PRPF8	ENSG00000100888	CHD8	protein_coding	45	4	75	NA	NA	0
PRPF8	ENSG00000104731	KLHDC4	protein_coding	45	4	64	NA	NA	0
PRPF8	ENSG00000106948	AKNA	protein_coding	45	4	67	NA	-1361	0
PRPF8	ENSG00000108582	CPD	protein_coding	45	4	64	NA	NA	0
PRPF8	ENSG00000109118	PHF12	protein_coding	45	4	82	NA	NA	0
PRPF8	ENSG00000110274	CEP164	protein_coding	45	4	69	NA	NA	0
PRPF8	ENSG00000112659	CUL9	protein_coding	45	4	74	0.511	-0.904	0
PRPF8	ENSG00000125755	SYMPK	protein_coding	45	4	75	NA	-0.430	0
PRPF8	ENSG00000135912	TTLL4	protein_coding	45	4	74	NA	-0.380	0
PRPF8	ENSG00000136381	IREB2	protein_coding	45	4	71	NA	NA	0
PRPF8	ENSG00000137497	NUMA1	protein_coding	45	4	86	-0.201	NA	0
PRPF8	ENSG00000148180	GSN	protein_coding	45	4	72	0.991	NA	0
PRPF8	ENSG00000148396	SEC16A	protein_coding	45	4	94	NA	NA	0
PRPF8	ENSG00000154305	MIA3	protein_coding	45	4	66	0.383	-0.202	0
PRPF8	ENSG00000159140	SON	protein_coding	45	4	71	0.241	0.436	0
PRPF8	ENSG00000166783	MARF1	protein_coding	45	4	71	NA	-0.403	0
PRPF8	ENSG00000167978	SRRM2	protein_coding	45	4	99	-0.519	-0.612	0
PRPF8	ENSG00000181090	EHMT1	protein_coding	45	4	73	NA	NA	0
PRPF8	ENSG00000184445	KNTC1	protein_coding	45	4	67	-1651	-1130	0
PRPF8	ENSG00000198265	HELZ	protein_coding	45	4	79	-0.530	NA	0
PRPF8	ENSG00000005339	CREBBP	protein_coding	44	4	74	NA	0.777	0
PRPF8	ENSG00000047410	TPR	protein_coding	44	4	58	NA	-0.675	0
PRPF8	ENSG00000058272	PPP1R12A	protein_coding	44	4	60	NA	NA	0
PRPF8	ENSG00000113441	LNPEP	protein_coding	44	4	66	0.417	NA	0
PRPF8	ENSG00000134899	ERCC5	protein_coding	44	4	66	NA	NA	0
PRPF8	ENSG00000137076	TLN1	protein_coding	44	4	67	NA	-0.818	0
PRPF8	ENSG00000138095	LRPPRC	protein_coding	44	4	80	-0.514	NA	0
PRPF8	ENSG00000139613	SMARCC2	protein_coding	44	4	70	NA	-0.813	0
PRPF8	ENSG00000139697	SBNO1	protein_coding	44	4	71	-0.534	NA	0
PRPF8	ENSG00000143379	SETDB1	protein_coding	44	4	67	NA	NA	0
PRPF8	ENSG00000145833	DDX46	protein_coding	44	4	68	NA	NA	0
PRPF8	ENSG00000164828	SUN1	protein_coding	44	4	87	NA	-0.524	0
PRPF8	ENSG00000168137	SETD5	protein_coding	44	4	92	NA	-0.269	0
PRPF8	ENSG00000171570	RAB4B-EGLN2	protein_coding	44	4	80	NA	NA	0
PRPF8	ENSG00000173230	GOLGB1	protein_coding	44	4	63	0.639	0.295	0
PRPF8	ENSG00000196642	RABL6	protein_coding	44	4	88	NA	NA	0
PRPF8	ENSG00000213983	AP1G2	protein_coding	44	4	80	NA	NA	0
PRPF8	ENSG00000244255	AL645922.1	protein_coding	44	2	60	7111	NA	0
PRPF8	ENSG00000254996	ANKHD1-EIF4EBP3	protein_coding	44	4	69	NA	-1769	0
PRPF8	ENSG00000260537	AC012184.2	protein_coding	44	4	80	NA	NA	0
PRPF8	ENSG00000008300	CELSR3	protein_coding	43	4	58	0.616	NA	0
PRPF8	ENSG00000088179	PTPN4	protein_coding	43	4	64	0.593	NA	0
PRPF8	ENSG00000100106	TRIOBP	protein_coding	43	4	68	-0.604	NA	0
PRPF8	ENSG00000107186	MPDZ	protein_coding	43	4	60	NA	-0.467	0
PRPF8	ENSG00000108654	DDX5	protein_coding	43	4	86	0.279	0.322	0
PRPF8	ENSG00000111642	CHD4	protein_coding	43	4	68	-0.174	-0.185	0
PRPF8	ENSG00000112531	QKI	protein_coding	43	4	68	-0.404	NA	0
PRPF8	ENSG00000114770	ABCC5	protein_coding	43	4	68	NA	-0.487	0
PRPF8	ENSG00000114841	DNAH1	protein_coding	43	4	59	NA	-1002	0
PRPF8	ENSG00000115355	CCDC88A	protein_coding	43	4	79	-0.626	-0.661	0
PRPF8	ENSG00000116641	DOCK7	protein_coding	43	4	56	-0.209	NA	0
PRPF8	ENSG00000118873	RAB3GAP2	protein_coding	43	4	57	NA	-0.416	0
PRPF8	ENSG00000120071	KANSL1	protein_coding	43	4	71	NA	NA	0
PRPF8	ENSG00000124177	CHD6	protein_coding	43	4	77	NA	-0.543	0
PRPF8	ENSG00000130779	CLIP1	protein_coding	43	4	71	0.529	NA	0
PRPF8	ENSG00000141956	PRDM15	protein_coding	43	4	70	NA	0.456	0
PRPF8	ENSG00000141959	PFKL	protein_coding	43	4	72	NA	NA	0
PRPF8	ENSG00000142949	PTPRF	protein_coding	43	4	72	NA	NA	0
PRPF8	ENSG00000165525	NEMF	protein_coding	43	4	58	NA	NA	0
PRPF8	ENSG00000167615	LENG8	protein_coding	43	4	82	NA	-0.574	0
PRPF8	ENSG00000173273	TNKS	protein_coding	43	4	68	NA	-0.443	0
PRPF8	ENSG00000187741	FANCA	protein_coding	43	4	82	-1955	-0.658	0
PRPF8	ENSG00000189091	SF3B3	protein_coding	43	4	87	-1227	-0.644	0
PRPF8	ENSG00000197136	PCNX3	protein_coding	43	4	74	NA	0.815	0
PRPF8	ENSG00000198700	IPO9	protein_coding	43	4	89	-0.744	-0.759	0
PRPF8	ENSG00000204580	DDR1	protein_coding	43	4	64	0.827	0.389	0
PRPF8	ENSG00000214021	TTLL3	protein_coding	43	4	70	0.361	-1412	0
PRPF8	ENSG00000258465	AL139011.2	protein_coding	43	4	74	NA	NA	0
PRPF8	ENSG00000264187	AC055811.2	protein_coding	43	4	79	NA	NA	0
PRPF8	ENSG00000030066	NUP160	protein_coding	42	4	64	NA	0.233	0
PRPF8	ENSG00000055483	USP36	protein_coding	42	4	77	NA	0.487	0
PRPF8	ENSG00000065534	MYLK	protein_coding	42	2	59	0.668	NA	0
PRPF8	ENSG00000075292	ZNF638	protein_coding	42	4	77	NA	-0.410	0
PRPF8	ENSG00000084774	CAD	protein_coding	42	4	74	-0.469	-0.992	0
PRPF8	ENSG00000092929	UNC13D	protein_coding	42	4	86	0.629	NA	0
PRPF8	ENSG00000100731	PCNX1	protein_coding	42	4	61	NA	NA	0
PRPF8	ENSG00000101361	NOP56	protein_coding	42	4	88	-0.866	NA	0
PRPF8	ENSG00000103197	TSC2	protein_coding	42	4	64	0.400	NA	0
PRPF8	ENSG00000106263	EIF3B	protein_coding	42	4	82	-0.388	0.158	0
PRPF8	ENSG00000107890	ANKRD26	protein_coding	42	4	50	NA	-0.690	0
PRPF8	ENSG00000115020	PIKFYVE	protein_coding	42	4	67	NA	-0.601	0
PRPF8	ENSG00000115762	PLEKHB2	protein_coding	42	4	65	0.408	0.576	0
PRPF8	ENSG00000119707	RBM25	protein_coding	42	4	64	-0.432	NA	0
PRPF8	ENSG00000127463	EMC1	protein_coding	42	4	80	-0.720	-0.272	0
PRPF8	ENSG00000129933	MAU2	protein_coding	42	4	80	NA	NA	0
PRPF8	ENSG00000131584	ACAP3	protein_coding	42	4	80	NA	NA	0
PRPF8	ENSG00000132300	PTCD3	protein_coding	42	4	88	-0.498	-0.576	0
PRPF8	ENSG00000137955	RABGGTB	protein_coding	42	4	92	-0.485	NA	0
PRPF8	ENSG00000145907	G3BP1	protein_coding	42	4	87	-0.218	NA	0
PRPF8	ENSG00000147133	TAF1	protein_coding	42	4	60	NA	-0.396	0
PRPF8	ENSG00000151148	UBE3B	protein_coding	42	4	66	NA	NA	0
PRPF8	ENSG00000160613	PCSK7	protein_coding	42	4	68	0.518	NA	0
PRPF8	ENSG00000164050	PLXNB1	protein_coding	42	4	71	NA	-0.839	0
PRPF8	ENSG00000164880	INTS1	protein_coding	42	4	59	NA	NA	0
PRPF8	ENSG00000166012	TAF1D	protein_coding	42	4	99	0.339	0.567	0
PRPF8	ENSG00000166747	AP1G1	protein_coding	42	4	71	0.260	0.956	0
PRPF8	ENSG00000169905	TOR1AIP2	protein_coding	42	4	57	NA	0.476	0
PRPF8	ENSG00000170242	USP47	protein_coding	42	4	52	0.502	0.838	0
PRPF8	ENSG00000171316	CHD7	protein_coding	42	4	66	NA	-0.436	0
PRPF8	ENSG00000178950	GAK	protein_coding	42	4	78	0.607	NA	0
PRPF8	ENSG00000198793	MTOR	protein_coding	42	4	71	NA	-0.566	0
PRPF8	ENSG00000205726	ITSN1	protein_coding	42	3	63	NA	1219	0
PRPF8	ENSG00000241973	PI4KA	protein_coding	42	4	79	-0.688	-0.603	0
PRPF8	ENSG00000266074	BAHCC1	protein_coding	42	4	57	NA	-0.740	0
PRPF8	ENSG00000285238	AC006064.6	protein_coding	42	4	87	NA	NA	0
PRPF8	ENSG00000056586	RC3H2	protein_coding	41	4	73	NA	NA	0
PRPF8	ENSG00000069329	VPS35	protein_coding	41	4	62	NA	NA	0
PRPF8	ENSG00000072310	SREBF1	protein_coding	41	4	91	NA	-1066	0
PRPF8	ENSG00000090615	GOLGA3	protein_coding	41	4	68	NA	NA	0
PRPF8	ENSG00000092847	2020-08-01	protein_coding	41	4	69	NA	-0.277	0
PRPF8	ENSG00000096696	DSP	protein_coding	41	2	51	0.283	NA	0
PRPF8	ENSG00000103994	ZNF106	protein_coding	41	4	62	NA	-0.191	0
PRPF8	ENSG00000104133	SPG11	protein_coding	41	4	62	NA	-1078	0
PRPF8	ENSG00000105993	DNAJB6	protein_coding	41	4	66	NA	NA	0
PRPF8	ENSG00000110321	EIF4G2	protein_coding	41	4	93	-0.302	0.600	0
PRPF8	ENSG00000131503	ANKHD1	protein_coding	41	4	64	NA	NA	0
PRPF8	ENSG00000131626	PPFIA1	protein_coding	41	4	56	NA	NA	0
PRPF8	ENSG00000136709	WDR33	protein_coding	41	4	75	NA	0.434	0
PRPF8	ENSG00000138834	MAPK8IP3	protein_coding	41	4	75	1058	NA	0
PRPF8	ENSG00000139645	ANKRD52	protein_coding	41	4	68	-0.193	NA	0
PRPF8	ENSG00000140575	IQGAP1	protein_coding	41	4	60	0.564	NA	0
PRPF8	ENSG00000143624	INTS3	protein_coding	41	4	63	-0.451	-0.306	0
PRPF8	ENSG00000149930	TAOK2	protein_coding	41	4	71	0.393	0.667	0
PRPF8	ENSG00000152223	EPG5	protein_coding	41	4	62	NA	-0.712	0
PRPF8	ENSG00000160294	MCM3AP	protein_coding	41	4	69	NA	NA	0
PRPF8	ENSG00000164944	VIRMA	protein_coding	41	4	63	NA	0.504	0
PRPF8	ENSG00000182473	EXOC7	protein_coding	41	4	80	NA	NA	0
PRPF8	ENSG00000183495	EP400	protein_coding	41	4	73	NA	-0.514	0
PRPF8	ENSG00000185359	HGS	protein_coding	41	4	87	NA	0.430	0
PRPF8	ENSG00000196235	SUPT5H	protein_coding	41	4	68	0.528	0.609	0
PRPF8	ENSG00000196504	PRPF40A	protein_coding	41	4	68	NA	0.266	0
PRPF8	ENSG00000197879	MYO1C	protein_coding	41	4	60	NA	NA	0
PRPF8	ENSG00000198707	CEP290	protein_coding	41	4	51	NA	-0.688	0
PRPF8	ENSG00000198837	DENND4B	protein_coding	41	4	82	0.402	NA	0
PRPF8	ENSG00000205356	TECPR1	protein_coding	41	4	59	NA	NA	0
PRPF8	ENSG00000219481	NBPF1	protein_coding	41	4	84	NA	NA	0
PRPF8	ENSG00000273734	AC005258.1	protein_coding	41	4	94	NA	NA	0
PRPF8	ENSG00000284431	AL022238.4	protein_coding	41	4	69	NA	NA	0
PRPF8	ENSG00000284820	AC068946.2	protein_coding	41	4	67	NA	NA	0
PRPF8	ENSG00000049759	NEDD4L	protein_coding	40	4	57	-0.588	0.427	0
PRPF8	ENSG00000061987	MON2	protein_coding	40	4	62	0.278	-0.362	0
PRPF8	ENSG00000071537	SEL1L	protein_coding	40	4	67	-0.706	NA	0
PRPF8	ENSG00000075702	WDR62	protein_coding	40	4	62	-0.699	NA	0
PRPF8	ENSG00000079805	DNM2	protein_coding	40	4	84	NA	-0.627	0
PRPF8	ENSG00000083642	PDS5B	protein_coding	40	4	57	NA	NA	0
PRPF8	ENSG00000089916	GPATCH2L	protein_coding	40	4	72	NA	-0.489	0
PRPF8	ENSG00000090857	PDPR	protein_coding	40	4	65	-0.768	-0.385	0
PRPF8	ENSG00000101596	SMCHD1	protein_coding	40	4	69	-0.429	NA	0
PRPF8	ENSG00000102144	PGK1	protein_coding	40	4	74	-1430	-1219	0
PRPF8	ENSG00000104067	TJP1	protein_coding	40	4	61	0.250	NA	0
PRPF8	ENSG00000108312	UBTF	protein_coding	40	4	60	NA	0.350	0
PRPF8	ENSG00000112893	MAN2A1	protein_coding	40	4	58	-0.389	NA	0
PRPF8	ENSG00000115657	ABCB6	protein_coding	40	4	66	-0.634	-1191	0
PRPF8	ENSG00000124006	OBSL1	protein_coding	40	4	65	-0.983	-0.595	0
PRPF8	ENSG00000124067	SLC12A4	protein_coding	40	4	83	0.364	-0.923	0
PRPF8	ENSG00000126012	KDM5C	protein_coding	40	4	63	NA	NA	0
PRPF8	ENSG00000126217	MCF2L	protein_coding	40	2	64	NA	NA	0
PRPF8	ENSG00000128915	ICE2	protein_coding	40	4	60	NA	NA	0
PRPF8	ENSG00000130723	PRRC2B	protein_coding	40	4	78	NA	-0.347	0
PRPF8	ENSG00000131018	SYNE1	protein_coding	40	2	46	1506	4749	0
PRPF8	ENSG00000132510	KDM6B	protein_coding	40	4	57	0.842	NA	0
PRPF8	ENSG00000136279	DBNL	protein_coding	40	4	62	NA	-0.651	0
PRPF8	ENSG00000140332	TLE3	protein_coding	40	4	82	NA	0.708	0
PRPF8	ENSG00000142208	AKT1	protein_coding	40	4	66	-0.282	NA	0
PRPF8	ENSG00000148773	MKI67	protein_coding	40	4	68	-2292	-0.171	0
PRPF8	ENSG00000149485	FADS1	protein_coding	40	4	86	-1920	-2520	0
PRPF8	ENSG00000149577	SIDT2	protein_coding	40	4	67	NA	-0.553	0
PRPF8	ENSG00000153944	MSI2	protein_coding	40	4	78	NA	-0.639	0
PRPF8	ENSG00000163681	SLMAP	protein_coding	40	4	65	NA	NA	0
PRPF8	ENSG00000165029	ABCA1	protein_coding	40	2	56	0.477	NA	0
PRPF8	ENSG00000168395	ING5	protein_coding	40	4	59	-1019	NA	0
PRPF8	ENSG00000170004	CHD3	protein_coding	40	4	56	NA	-0.719	0
PRPF8	ENSG00000177106	EPS8L2	protein_coding	40	4	66	0.951	NA	0
PRPF8	ENSG00000177728	TMEM94	protein_coding	40	4	67	NA	NA	0
PRPF8	ENSG00000185920	PTCH1	protein_coding	40	4	68	-1163	NA	0
PRPF8	ENSG00000186001	LRCH3	protein_coding	40	4	65	NA	NA	0
PRPF8	ENSG00000189079	ARID2	protein_coding	40	4	56	NA	NA	0
PRPF8	ENSG00000197111	PCBP2	protein_coding	40	4	89	-0.153	-0.440	0
PRPF8	ENSG00000215440	NPEPL1	protein_coding	40	4	61	-0.698	NA	0
PRPF8	ENSG00000258653	AC005520.1	protein_coding	40	4	58	NA	NA	0
PRPF8	ENSG00000033627	ATP6V0A1	protein_coding	39	4	69	0.808	NA	0
PRPF8	ENSG00000054690	PLEKHH1	protein_coding	39	4	57	NA	-1790	0
PRPF8	ENSG00000061273	HDAC7	protein_coding	39	4	72	NA	-0.490	0
PRPF8	ENSG00000065526	SPEN	protein_coding	39	4	71	-0.408	NA	0
PRPF8	ENSG00000076555	ACACB	protein_coding	39	4	65	NA	NA	0
PRPF8	ENSG00000082898	XPO1	protein_coding	39	4	84	-0.645	NA	0
PRPF8	ENSG00000090863	GLG1	protein_coding	39	4	54	-0.223	-0.528	0
PRPF8	ENSG00000103249	CLCN7	protein_coding	39	4	67	NA	NA	0
PRPF8	ENSG00000103549	RNF40	protein_coding	39	4	68	0.456	0.869	0
PRPF8	ENSG00000104824	HNRNPL	protein_coding	39	4	77	-0.775	NA	0
PRPF8	ENSG00000105576	TNPO2	protein_coding	39	4	78	-0.492	NA	0
PRPF8	ENSG00000108848	LUC7L3	protein_coding	39	4	58	-0.274	NA	0
PRPF8	ENSG00000113387	SUB1	protein_coding	39	4	60	NA	0.447	0
PRPF8	ENSG00000113648	H2AFY	protein_coding	39	4	71	0.406	NA	0
PRPF8	ENSG00000113649	TCERG1	protein_coding	39	4	58	NA	NA	0
PRPF8	ENSG00000114127	XRN1	protein_coding	39	4	59	0.546	NA	0
PRPF8	ENSG00000115053	NCL	protein_coding	39	4	91	-0.521	NA	0
PRPF8	ENSG00000115091	ACTR3	protein_coding	39	4	71	-0.212	0.334	0
PRPF8	ENSG00000117724	CENPF	protein_coding	39	4	54	-1911	NA	0
PRPF8	ENSG00000119285	HEATR1	protein_coding	39	4	57	NA	NA	0
PRPF8	ENSG00000124574	ABCC10	protein_coding	39	4	58	0.772	NA	0
PRPF8	ENSG00000127616	SMARCA4	protein_coding	39	4	65	NA	-0.517	0
PRPF8	ENSG00000129351	ILF3	protein_coding	39	4	76	-0.645	NA	0
PRPF8	ENSG00000132780	NASP	protein_coding	39	4	66	-1411	-0.293	0
PRPF8	ENSG00000133657	ATP13A3	protein_coding	39	4	63	0.738	NA	0
PRPF8	ENSG00000141458	NPC1	protein_coding	39	4	65	NA	-0.746	0
PRPF8	ENSG00000141551	CSNK1D	protein_coding	39	4	86	0.340	0.266	0
PRPF8	ENSG00000141556	TBCD	protein_coding	39	4	53	-0.554	-0.641	0
PRPF8	ENSG00000151503	NCAPD3	protein_coding	39	4	57	-1657	-0.786	0
PRPF8	ENSG00000159459	UBR1	protein_coding	39	4	50	0.552	NA	0
PRPF8	ENSG00000160299	PCNT	protein_coding	39	4	64	-1026	-0.457	0
PRPF8	ENSG00000161533	ACOX1	protein_coding	39	4	59	0.333	NA	0
PRPF8	ENSG00000164190	NIPBL	protein_coding	39	4	58	NA	0.378	0
PRPF8	ENSG00000166986	MARS	protein_coding	39	4	86	0.555	NA	0
PRPF8	ENSG00000168488	ATXN2L	protein_coding	39	4	73	NA	NA	0
PRPF8	ENSG00000177084	POLE	protein_coding	39	4	63	-1299	-0.732	0
PRPF8	ENSG00000178921	PFAS	protein_coding	39	4	55	-0.970	-0.402	0
PRPF8	ENSG00000179364	PACS2	protein_coding	39	4	60	NA	NA	0
PRPF8	ENSG00000186174	BCL9L	protein_coding	39	4	58	NA	0.660	0
PRPF8	ENSG00000187775	DNAH17	protein_coding	39	2	51	1474	NA	0
PRPF8	ENSG00000196547	MAN2A2	protein_coding	39	4	76	NA	-0.499	0
PRPF8	ENSG00000197226	TBC1D9B	protein_coding	39	4	79	NA	NA	0
PRPF8	ENSG00000215301	DDX3X	protein_coding	39	4	73	NA	0.463	0
PRPF8	ENSG00000249209	AP000311.1	protein_coding	39	4	61	NA	NA	0
PRPF8	ENSG00000259522	AL136295.4	protein_coding	39	4	58	NA	NA	0
PRPF8	ENSG00000260729	AC009690.1	protein_coding	39	4	65	NA	NA	0
PRPF8	ENSG00000275066	SYNRG	protein_coding	39	4	68	NA	NA	0
PRPF8	ENSG00000285404	Z82190.2	protein_coding	39	4	49	NA	NA	0
PRPF8	ENSG00000013573	DDX11	protein_coding	38	4	74	NA	NA	0
PRPF8	ENSG00000015133	CCDC88C	protein_coding	38	4	53	NA	NA	0
PRPF8	ENSG00000047849	MAP4	protein_coding	38	4	66	NA	-0.717	0
PRPF8	ENSG00000065150	IPO5	protein_coding	38	4	65	-0.635	NA	0
PRPF8	ENSG00000077235	GTF3C1	protein_coding	38	4	74	0.308	NA	0
PRPF8	ENSG00000087266	SH3BP2	protein_coding	38	4	58	1039	NA	0
PRPF8	ENSG00000100083	GGA1	protein_coding	38	4	61	NA	-0.295	0
PRPF8	ENSG00000100664	EIF5	protein_coding	38	4	77	0.226	0.619	0
PRPF8	ENSG00000101191	DIDO1	protein_coding	38	4	80	NA	0.203	0
PRPF8	ENSG00000101290	CDS2	protein_coding	38	4	65	0.258	NA	0
PRPF8	ENSG00000104365	IKBKB	protein_coding	38	4	60	0.616	NA	0
PRPF8	ENSG00000105220	GPI	protein_coding	38	4	70	-1347	-1307	0
PRPF8	ENSG00000105726	ATP13A1	protein_coding	38	4	76	NA	NA	0
PRPF8	ENSG00000108424	KPNB1	protein_coding	38	4	69	-0.656	NA	0
PRPF8	ENSG00000111530	CAND1	protein_coding	38	4	59	NA	NA	0
PRPF8	ENSG00000111596	CNOT2	protein_coding	38	4	64	NA	0.302	0
PRPF8	ENSG00000112701	SENP6	protein_coding	38	4	68	NA	NA	0
PRPF8	ENSG00000112739	PRPF4B	protein_coding	38	4	66	NA	0.421	0
PRPF8	ENSG00000113161	HMGCR	protein_coding	38	4	69	NA	-0.530	0
PRPF8	ENSG00000114982	KANSL3	protein_coding	38	4	70	NA	NA	0
PRPF8	ENSG00000121892	PDS5A	protein_coding	38	4	56	NA	NA	0
PRPF8	ENSG00000123200	ZC3H13	protein_coding	38	4	51	NA	NA	0
PRPF8	ENSG00000124486	USP9X	protein_coding	38	4	55	-0.426	-0.351	0
PRPF8	ENSG00000128512	DOCK4	protein_coding	38	4	58	0.775	NA	0
PRPF8	ENSG00000130158	DOCK6	protein_coding	38	4	57	NA	-1139	0
PRPF8	ENSG00000131149	GSE1	protein_coding	38	4	71	NA	-0.505	0
PRPF8	ENSG00000132549	VPS13B	protein_coding	38	4	52	NA	-0.705	0
PRPF8	ENSG00000135164	DMTF1	protein_coding	38	4	66	NA	NA	0
PRPF8	ENSG00000135486	HNRNPA1	protein_coding	38	4	74	-0.806	-0.470	0
PRPF8	ENSG00000135837	CEP350	protein_coding	38	4	56	NA	NA	0
PRPF8	ENSG00000137801	THBS1	protein_coding	38	2	58	0.226	4582	0
PRPF8	ENSG00000139618	BRCA2	protein_coding	38	4	47	-1208	0.371	0
PRPF8	ENSG00000139725	RHOF	protein_coding	38	4	59	-0.373	NA	0
PRPF8	ENSG00000147854	UHRF2	protein_coding	38	4	64	0.502	NA	0
PRPF8	ENSG00000153147	SMARCA5	protein_coding	38	4	54	NA	0.445	0
PRPF8	ENSG00000159217	IGF2BP1	protein_coding	38	4	75	-0.677	-0.233	0
PRPF8	ENSG00000163660	CCNL1	protein_coding	38	4	80	NA	NA	0
PRPF8	ENSG00000163946	FAM208A	protein_coding	38	4	57	NA	-0.376	0
PRPF8	ENSG00000164733	CTSB	protein_coding	38	4	68	-0.354	NA	0
PRPF8	ENSG00000164877	MICALL2	protein_coding	38	4	77	NA	NA	0
PRPF8	ENSG00000164889	SLC4A2	protein_coding	38	4	68	NA	NA	0
PRPF8	ENSG00000165795	NDRG2	protein_coding	38	4	62	-0.875	NA	0
PRPF8	ENSG00000165801	ARHGEF40	protein_coding	38	4	62	-1120	NA	0
PRPF8	ENSG00000167258	CDK12	protein_coding	38	4	62	NA	NA	0
PRPF8	ENSG00000172375	C2CD2L	protein_coding	38	4	71	NA	NA	0
PRPF8	ENSG00000172534	HCFC1	protein_coding	38	4	71	NA	0.349	0
PRPF8	ENSG00000175634	RPS6KB2	protein_coding	38	4	64	NA	NA	0
PRPF8	ENSG00000175727	MLXIP	protein_coding	38	4	78	NA	NA	0
PRPF8	ENSG00000185344	ATP6V0A2	protein_coding	38	4	74	0.488	-0.505	0
PRPF8	ENSG00000185722	ANKFY1	protein_coding	38	4	75	0.296	-0.580	0
PRPF8	ENSG00000196497	IPO4	protein_coding	38	4	56	-0.789	NA	0
PRPF8	ENSG00000196498	NCOR2	protein_coding	38	4	49	NA	NA	0
PRPF8	ENSG00000197150	ABCB8	protein_coding	38	4	70	NA	NA	0
PRPF8	ENSG00000197603	C5orf42	protein_coding	38	2	51	0.537	NA	0
PRPF8	ENSG00000198000	NOL8	protein_coding	38	4	58	NA	0.417	0
PRPF8	ENSG00000198363	ASPH	protein_coding	38	4	68	NA	-0.694	0
PRPF8	ENSG00000204371	EHMT2	protein_coding	38	4	71	-0.487	NA	0
PRPF8	ENSG00000213949	ITGA1	protein_coding	38	4	46	-0.832	3245	0
PRPF8	ENSG00000258643	BCL2L2-PABPN1	protein_coding	38	4	87	NA	1330	0
PRPF8	ENSG00000277957	SENP3-EIF4A1	protein_coding	38	4	100	NA	2434	0
PRPF8	ENSG00000284946	AC068831.7	protein_coding	38	4	64	NA	NA	0
PRPF8	ENSG00000026036	RTEL1-TNFRSF6B	protein_coding	37	4	66	NA	NA	0
PRPF8	ENSG00000047188	YTHDC2	protein_coding	37	4	53	0.514	-0.434	0
PRPF8	ENSG00000052841	TTC17	protein_coding	37	4	62	NA	-0.420	0
PRPF8	ENSG00000058600	POLR3E	protein_coding	37	4	73	-0.365	NA	0
PRPF8	ENSG00000066739	ATG2B	protein_coding	37	4	57	0.473	-0.699	0
PRPF8	ENSG00000066933	MYO9A	protein_coding	37	4	55	NA	NA	0
PRPF8	ENSG00000072110	ACTN1	protein_coding	37	4	64	NA	NA	0
PRPF8	ENSG00000073614	KDM5A	protein_coding	37	4	64	0.319	NA	0
PRPF8	ENSG00000074054	CLASP1	protein_coding	37	4	53	NA	NA	0
PRPF8	ENSG00000085788	DDHD2	protein_coding	37	4	60	NA	-0.582	0
PRPF8	ENSG00000092201	SUPT16H	protein_coding	37	4	54	-0.536	0.255	0
PRPF8	ENSG00000099194	SCD	protein_coding	37	4	68	-0.880	-1861	0
PRPF8	ENSG00000100345	MYH9	protein_coding	37	3	58	0.452	NA	0
PRPF8	ENSG00000100813	ACIN1	protein_coding	37	4	74	NA	0.541	0
PRPF8	ENSG00000105053	VRK3	protein_coding	37	4	66	NA	-0.873	0
PRPF8	ENSG00000107863	ARHGAP21	protein_coding	37	4	55	NA	NA	0
PRPF8	ENSG00000110514	MADD	protein_coding	37	4	58	NA	NA	0
PRPF8	ENSG00000112655	PTK7	protein_coding	37	4	50	NA	-1318	0
PRPF8	ENSG00000119688	ABCD4	protein_coding	37	4	79	0.333	NA	0
PRPF8	ENSG00000120800	UTP20	protein_coding	37	4	47	-0.931	NA	0
PRPF8	ENSG00000125676	THOC2	protein_coding	37	4	61	-0.499	-0.397	0
PRPF8	ENSG00000130816	DNMT1	protein_coding	37	4	72	-1524	-0.627	0
PRPF8	ENSG00000132330	SCLY	protein_coding	37	4	61	NA	-0.491	0
PRPF8	ENSG00000134352	IL6ST	protein_coding	37	4	54	0.823	0.845	0
PRPF8	ENSG00000134444	KIAA1468	protein_coding	37	4	52	0.640	NA	0
PRPF8	ENSG00000135476	ESPL1	protein_coding	37	4	55	-1373	-0.639	0
PRPF8	ENSG00000136527	TRA2B	protein_coding	37	4	75	-0.696	0.442	0
PRPF8	ENSG00000137073	UBAP2	protein_coding	37	4	60	-0.475	-0.590	0
PRPF8	ENSG00000137411	VARS2	protein_coding	37	4	52	-0.536	NA	0
PRPF8	ENSG00000137802	MAPKBP1	protein_coding	37	4	57	0.437	0.622	0
PRPF8	ENSG00000137812	KNL1	protein_coding	37	4	59	-0.330	NA	0
PRPF8	ENSG00000140943	MBTPS1	protein_coding	37	4	67	NA	NA	0
PRPF8	ENSG00000141867	BRD4	protein_coding	37	4	72	NA	0.879	0
PRPF8	ENSG00000142207	URB1	protein_coding	37	4	70	NA	-0.447	0
PRPF8	ENSG00000143382	ADAMTSL4	protein_coding	37	4	74	-1480	-1547	0
PRPF8	ENSG00000147526	TACC1	protein_coding	37	4	63	0.703	NA	0
PRPF8	ENSG00000149639	SOGA1	protein_coding	37	4	66	NA	NA	0
PRPF8	ENSG00000162601	MYSM1	protein_coding	37	4	61	0.232	NA	0
PRPF8	ENSG00000163872	YEATS2	protein_coding	37	4	54	-0.656	-1618	0
PRPF8	ENSG00000163931	TKT	protein_coding	37	4	69	NA	NA	0
PRPF8	ENSG00000166377	ATP9B	protein_coding	37	4	54	NA	NA	0
PRPF8	ENSG00000166436	TRIM66	protein_coding	37	4	62	NA	-1351	0
PRPF8	ENSG00000168056	LTBP3	protein_coding	37	4	61	0.568	-0.568	0
PRPF8	ENSG00000168610	STAT3	protein_coding	37	4	68	0.456	-0.762	0
PRPF8	ENSG00000180376	CCDC66	protein_coding	37	4	58	NA	NA	0
PRPF8	ENSG00000182149	IST1	protein_coding	37	4	57	-0.181	NA	0
PRPF8	ENSG00000198026	ZNF335	protein_coding	37	4	63	NA	0.892	0
PRPF8	ENSG00000198399	ITSN2	protein_coding	37	4	55	0.745	NA	0
PRPF8	ENSG00000258890	CEP95	protein_coding	37	4	65	NA	NA	0
PRPF8	ENSG00000278311	GGNBP2	protein_coding	37	4	62	0.266	0.311	0
PRPF8	ENSG00000005007	UPF1	protein_coding	36	4	68	NA	0.464	0
PRPF8	ENSG00000021776	AQR	protein_coding	36	4	46	0.344	0.367	0
PRPF8	ENSG00000067066	SP100	protein_coding	36	4	53	1384	NA	0
PRPF8	ENSG00000067225	PKM	protein_coding	36	4	94	-1468	-0.582	0
PRPF8	ENSG00000081760	AACS	protein_coding	36	4	70	NA	-1141	0
PRPF8	ENSG00000083520	DIS3	protein_coding	36	4	52	NA	0.504	0
PRPF8	ENSG00000087274	ADD1	protein_coding	36	4	71	-0.247	NA	0
PRPF8	ENSG00000090905	TNRC6A	protein_coding	36	4	61	0.469	0.453	0
PRPF8	ENSG00000099991	CABIN1	protein_coding	36	4	53	NA	-0.630	0
PRPF8	ENSG00000104885	DOT1L	protein_coding	36	4	61	-1019	NA	0
PRPF8	ENSG00000108883	EFTUD2	protein_coding	36	4	74	-0.211	-0.129	0
PRPF8	ENSG00000114933	INO80D	protein_coding	36	4	46	NA	1078	0
PRPF8	ENSG00000116539	ASH1L	protein_coding	36	4	60	0.593	-0.285	0
PRPF8	ENSG00000116560	SFPQ	protein_coding	36	4	77	-0.294	0.574	0
PRPF8	ENSG00000116754	SRSF11	protein_coding	36	4	59	-0.516	NA	0
PRPF8	ENSG00000119596	YLPM1	protein_coding	36	4	51	NA	NA	0
PRPF8	ENSG00000119927	GPAM	protein_coding	36	4	60	NA	1165	0
PRPF8	ENSG00000120616	EPC1	protein_coding	36	4	65	NA	1082	0
PRPF8	ENSG00000123104	ITPR2	protein_coding	36	2	45	-1329	NA	0
PRPF8	ENSG00000124571	XPO5	protein_coding	36	4	57	-0.399	-0.474	0
PRPF8	ENSG00000125503	PPP1R12C	protein_coding	36	4	60	NA	NA	0
PRPF8	ENSG00000127980	PEX1	protein_coding	36	4	49	NA	-0.594	0
PRPF8	ENSG00000131747	TOP2A	protein_coding	36	4	48	-1859	-0.661	0
PRPF8	ENSG00000132463	GRSF1	protein_coding	36	4	60	-0.361	NA	0
PRPF8	ENSG00000133226	SRRM1	protein_coding	36	4	56	NA	NA	0
PRPF8	ENSG00000135365	PHF21A	protein_coding	36	4	51	NA	-0.453	0
PRPF8	ENSG00000135870	RC3H1	protein_coding	36	4	63	0.484	0.393	0
PRPF8	ENSG00000136699	SMPD4	protein_coding	36	4	65	-0.660	0.399	0
PRPF8	ENSG00000137177	KIF13A	protein_coding	36	4	54	0.226	-0.361	0
PRPF8	ENSG00000137776	SLTM	protein_coding	36	4	53	-0.653	NA	0
PRPF8	ENSG00000138002	IFT172	protein_coding	36	4	51	-1056	-1151	0
PRPF8	ENSG00000138434	SSFA2	protein_coding	36	4	56	0.416	0.320	0
PRPF8	ENSG00000138448	ITGAV	protein_coding	36	4	55	0.708	0.285	0
PRPF8	ENSG00000141646	SMAD4	protein_coding	36	4	68	NA	0.354	0
PRPF8	ENSG00000143569	UBAP2L	protein_coding	36	4	59	NA	NA	0
PRPF8	ENSG00000154803	FLCN	protein_coding	36	4	70	NA	NA	0
PRPF8	ENSG00000158636	EMSY	protein_coding	36	4	57	NA	-0.602	0
PRPF8	ENSG00000163867	ZMYM6	protein_coding	36	4	52	NA	0.310	0
PRPF8	ENSG00000170471	RALGAPB	protein_coding	36	4	56	0.381	NA	0
PRPF8	ENSG00000170759	KIF5B	protein_coding	36	4	43	NA	0.291	0
PRPF8	ENSG00000174953	DHX36	protein_coding	36	4	59	NA	NA	0
PRPF8	ENSG00000175899	A2M	protein_coding	36	2	50	-0.095	NA	0
PRPF8	ENSG00000177000	MTHFR	protein_coding	36	4	70	NA	-0.912	0
PRPF8	ENSG00000179335	CLK3	protein_coding	36	4	71	NA	NA	0
PRPF8	ENSG00000182944	EWSR1	protein_coding	36	4	84	-0.223	NA	0
PRPF8	ENSG00000187742	SECISBP2	protein_coding	36	4	58	NA	-0.506	0
PRPF8	ENSG00000198231	DDX42	protein_coding	36	4	64	0.107	NA	0
PRPF8	ENSG00000266173	STRADA	protein_coding	36	4	66	NA	NA	0
PRPF8	ENSG00000271741	AC114490.2	protein_coding	36	4	54	NA	NA	0
PRPF8	ENSG00000273217	AC008695.1	protein_coding	36	4	72	NA	NA	0
PRPF8	ENSG00000274810	NPHP3-ACAD11	protein_coding	36	4	52	NA	NA	0
PRPF8	ENSG00000004399	PLXND1	protein_coding	35	4	53	NA	-1818	0
PRPF8	ENSG00000005206	SPPL2B	protein_coding	35	4	76	NA	-0.738	0
PRPF8	ENSG00000015479	MATR3	protein_coding	35	4	66	NA	NA	0
PRPF8	ENSG00000042429	MED17	protein_coding	35	4	64	NA	0.771	0
PRPF8	ENSG00000057019	DCBLD2	protein_coding	35	4	53	NA	NA	0
PRPF8	ENSG00000061938	TNK2	protein_coding	35	4	56	NA	NA	0
PRPF8	ENSG00000064393	HIPK2	protein_coding	35	4	60	NA	-0.563	0
PRPF8	ENSG00000066777	ARFGEF1	protein_coding	35	4	52	NA	NA	0
PRPF8	ENSG00000067596	DHX8	protein_coding	35	4	58	0.210	0.829	0
PRPF8	ENSG00000070371	CLTCL1	protein_coding	35	4	53	NA	-0.930	0
PRPF8	ENSG00000071189	SNX13	protein_coding	35	4	62	NA	NA	0
PRPF8	ENSG00000073578	SDHA	protein_coding	35	4	63	-0.540	-0.589	0
PRPF8	ENSG00000075711	DLG1	protein_coding	35	4	59	NA	NA	0
PRPF8	ENSG00000077044	DGKD	protein_coding	35	4	57	NA	NA	0
PRPF8	ENSG00000090372	STRN4	protein_coding	35	4	68	NA	0.766	0
PRPF8	ENSG00000090621	PABPC4	protein_coding	35	4	75	-0.523	NA	0
PRPF8	ENSG00000094631	HDAC6	protein_coding	35	4	66	NA	-0.809	0
PRPF8	ENSG00000100393	EP300	protein_coding	35	4	57	NA	0.332	0
PRPF8	ENSG00000102189	EEA1	protein_coding	35	4	45	0.348	NA	0
PRPF8	ENSG00000102893	PHKB	protein_coding	35	4	49	NA	-1002	0
PRPF8	ENSG00000103275	UBE2I	protein_coding	35	4	67	NA	0.298	0
PRPF8	ENSG00000107290	SETX	protein_coding	35	4	59	NA	0.243	0
PRPF8	ENSG00000115183	TANC1	protein_coding	35	3	50	1514	NA	0
PRPF8	ENSG00000115216	NRBP1	protein_coding	35	4	53	0.299	1194	0
PRPF8	ENSG00000117859	OSBPL9	protein_coding	35	4	58	NA	-0.378	0
PRPF8	ENSG00000120008	WDR11	protein_coding	35	4	63	NA	-0.373	0
PRPF8	ENSG00000122257	RBBP6	protein_coding	35	4	51	-0.212	0.390	0
PRPF8	ENSG00000127054	INTS11	protein_coding	35	4	70	NA	NA	0
PRPF8	ENSG00000129250	KIF1C	protein_coding	35	4	59	NA	NA	0
PRPF8	ENSG00000131242	RAB11FIP4	protein_coding	35	4	62	-0.231	-0.815	0
PRPF8	ENSG00000131711	MAP1B	protein_coding	35	4	45	0.740	-0.952	0
PRPF8	ENSG00000132153	DHX30	protein_coding	35	4	72	NA	0.443	0
PRPF8	ENSG00000132953	XPO4	protein_coding	35	4	58	NA	NA	0
PRPF8	ENSG00000133858	ZFC3H1	protein_coding	35	4	58	NA	-0.370	0
PRPF8	ENSG00000136731	UGGT1	protein_coding	35	4	51	-1103	-0.752	0
PRPF8	ENSG00000137171	KLC4	protein_coding	35	4	54	NA	-0.690	0
PRPF8	ENSG00000139496	NUP58	protein_coding	35	4	58	-0.494	NA	0
PRPF8	ENSG00000140983	RHOT2	protein_coding	35	4	72	NA	NA	0
PRPF8	ENSG00000141503	MINK1	protein_coding	35	4	53	NA	-0.755	0
PRPF8	ENSG00000143442	POGZ	protein_coding	35	4	66	NA	NA	0
PRPF8	ENSG00000146063	TRIM41	protein_coding	35	4	64	NA	0.371	0
PRPF8	ENSG00000149136	SSRP1	protein_coding	35	4	58	-1066	-0.269	0
PRPF8	ENSG00000157212	PAXIP1	protein_coding	35	4	63	NA	NA	0
PRPF8	ENSG00000158863	FAM160B2	protein_coding	35	4	64	0.703	0.472	0
PRPF8	ENSG00000160218	TRAPPC10	protein_coding	35	4	60	0.417	NA	0
PRPF8	ENSG00000160285	LSS	protein_coding	35	4	62	NA	-1304	0
PRPF8	ENSG00000163945	UVSSA	protein_coding	35	4	56	NA	NA	0
PRPF8	ENSG00000164307	ERAP1	protein_coding	35	4	48	NA	-0.614	0
PRPF8	ENSG00000164941	INTS8	protein_coding	35	4	59	NA	-0.322	0
PRPF8	ENSG00000166348	USP54	protein_coding	35	4	49	NA	NA	0
PRPF8	ENSG00000166833	NAV2	protein_coding	35	2	50	-0.563	NA	0
PRPF8	ENSG00000167632	TRAPPC9	protein_coding	35	4	55	NA	-0.902	0
PRPF8	ENSG00000171456	ASXL1	protein_coding	35	4	70	NA	NA	0
PRPF8	ENSG00000172869	DMXL1	protein_coding	35	4	58	0.595	-0.912	0
PRPF8	ENSG00000179832	MROH1	protein_coding	35	4	51	NA	-1177	0
PRPF8	ENSG00000183020	AP2A2	protein_coding	35	4	54	0.467	NA	0
PRPF8	ENSG00000187109	NAP1L1	protein_coding	35	4	79	-0.421	-0.086	0
PRPF8	ENSG00000196313	POM121	protein_coding	35	4	63	-0.269	NA	0
PRPF8	ENSG00000196576	PLXNB2	protein_coding	35	4	51	NA	NA	0
PRPF8	ENSG00000214944	ARHGEF28	protein_coding	35	2	52	NA	NA	0
PRPF8	ENSG00000260007	AC107871.1	protein_coding	35	4	49	NA	NA	0
PRPF8	ENSG00000006459	KDM7A	protein_coding	34	4	51	-0.477	NA	0
PRPF8	ENSG00000009413	REV3L	protein_coding	34	4	50	0.579	-0.356	0
PRPF8	ENSG00000014216	CAPN1	protein_coding	34	4	62	0.785	NA	0
PRPF8	ENSG00000028310	BRD9	protein_coding	34	4	52	NA	NA	0
PRPF8	ENSG00000028528	SNX1	protein_coding	34	4	61	NA	NA	0
PRPF8	ENSG00000058673	ZC3H11A	protein_coding	34	4	55	NA	0.354	0
PRPF8	ENSG00000067900	ROCK1	protein_coding	34	4	45	0.676	0.251	0
PRPF8	ENSG00000070018	LRP6	protein_coding	34	4	46	-0.287	NA	0
PRPF8	ENSG00000075568	TMEM131	protein_coding	34	4	52	NA	NA	0
PRPF8	ENSG00000077157	PPP1R12B	protein_coding	34	4	50	NA	-0.689	0
PRPF8	ENSG00000078687	TNRC6C	protein_coding	34	4	45	-0.418	NA	0
PRPF8	ENSG00000079308	TNS1	protein_coding	34	4	42	-2231	-1105	0
PRPF8	ENSG00000099331	MYO9B	protein_coding	34	4	63	0.343	NA	0
PRPF8	ENSG00000099917	MED15	protein_coding	34	4	62	NA	0.662	0
PRPF8	ENSG00000100403	ZC3H7B	protein_coding	34	4	60	NA	NA	0
PRPF8	ENSG00000102900	NUP93	protein_coding	34	4	54	-0.669	NA	0
PRPF8	ENSG00000107331	ABCA2	protein_coding	34	4	50	-1177	-2250	0
PRPF8	ENSG00000107581	EIF3A	protein_coding	34	4	47	-0.355	NA	0
PRPF8	ENSG00000108349	CASC3	protein_coding	34	4	55	-0.282	0.149	0
PRPF8	ENSG00000108510	MED13	protein_coding	34	4	62	-0.286	NA	0
PRPF8	ENSG00000110046	ATG2A	protein_coding	34	4	59	NA	0.535	0
PRPF8	ENSG00000110367	DDX6	protein_coding	34	4	62	NA	NA	0
PRPF8	ENSG00000110911	SLC11A2	protein_coding	34	4	56	-0.608	NA	0
PRPF8	ENSG00000112339	HBS1L	protein_coding	34	4	65	0.307	0.306	0
PRPF8	ENSG00000112715	VEGFA	protein_coding	34	4	75	-0.771	-2285	0
PRPF8	ENSG00000112983	BRD8	protein_coding	34	4	56	-0.441	NA	0
PRPF8	ENSG00000113810	SMC4	protein_coding	34	4	55	-1511	NA	0
PRPF8	ENSG00000115421	PAPOLG	protein_coding	34	4	47	0.411	NA	0
PRPF8	ENSG00000116984	MTR	protein_coding	34	4	53	-0.408	-1199	0
PRPF8	ENSG00000117713	ARID1A	protein_coding	34	4	67	NA	NA	0
PRPF8	ENSG00000118260	CREB1	protein_coding	34	4	54	NA	NA	0
PRPF8	ENSG00000119685	TTLL5	protein_coding	34	4	49	NA	NA	0
PRPF8	ENSG00000119778	ATAD2B	protein_coding	34	4	52	NA	NA	0
PRPF8	ENSG00000126001	CEP250	protein_coding	34	4	55	-1006	-1135	0
PRPF8	ENSG00000127483	HP1BP3	protein_coding	34	4	57	-0.206	-0.847	0
PRPF8	ENSG00000130787	HIP1R	protein_coding	34	4	55	0.775	NA	0
PRPF8	ENSG00000130821	SLC6A8	protein_coding	34	4	66	-2254	-2088	0
PRPF8	ENSG00000132382	MYBBP1A	protein_coding	34	4	55	NA	NA	0
PRPF8	ENSG00000132424	PNISR	protein_coding	34	4	69	NA	-0.589	0
PRPF8	ENSG00000134294	SLC38A2	protein_coding	34	4	68	NA	NA	0
PRPF8	ENSG00000135387	CAPRIN1	protein_coding	34	4	60	-0.395	-0.301	0
PRPF8	ENSG00000136861	CDK5RAP2	protein_coding	34	4	54	-0.462	-0.677	0
PRPF8	ENSG00000140750	ARHGAP17	protein_coding	34	4	56	0.225	NA	0
PRPF8	ENSG00000140829	DHX38	protein_coding	34	4	53	NA	0.738	0
PRPF8	ENSG00000143776	CDC42BPA	protein_coding	34	4	51	NA	-0.548	0
PRPF8	ENSG00000156030	ELMSAN1	protein_coding	34	4	69	NA	NA	0
PRPF8	ENSG00000156531	PHF6	protein_coding	34	4	45	NA	NA	0
PRPF8	ENSG00000160796	NBEAL2	protein_coding	34	4	64	0.963	NA	0
PRPF8	ENSG00000163214	DHX57	protein_coding	34	4	47	NA	NA	0
PRPF8	ENSG00000164068	RNF123	protein_coding	34	4	56	NA	-0.485	0
PRPF8	ENSG00000165119	HNRNPK	protein_coding	34	4	59	-0.366	NA	0
PRPF8	ENSG00000167110	GOLGA2	protein_coding	34	4	62	0.442	NA	0
PRPF8	ENSG00000168724	DNAJC21	protein_coding	34	4	50	NA	NA	0
PRPF8	ENSG00000169375	SIN3A	protein_coding	34	4	55	-0.853	NA	0
PRPF8	ENSG00000169398	PTK2	protein_coding	34	4	59	-0.230	-0.576	0
PRPF8	ENSG00000173120	KDM2A	protein_coding	34	4	58	-0.209	0.351	0
PRPF8	ENSG00000174373	RALGAPA1	protein_coding	34	4	54	-0.394	NA	0
PRPF8	ENSG00000177189	RPS6KA3	protein_coding	34	4	51	-1011	-0.566	0
PRPF8	ENSG00000187535	IFT140	protein_coding	34	4	43	NA	NA	0
PRPF8	ENSG00000188529	SRSF10	protein_coding	34	4	63	NA	0.539	0
PRPF8	ENSG00000188554	NBR1	protein_coding	34	4	57	NA	-0.199	0
PRPF8	ENSG00000196187	TMEM63A	protein_coding	34	4	68	-0.508	-1696	0
PRPF8	ENSG00000196912	ANKRD36B	protein_coding	34	4	52	NA	-1014	0
PRPF8	ENSG00000197312	DDI2	protein_coding	34	4	62	-0.741	NA	0
PRPF8	ENSG00000197892	KIF13B	protein_coding	34	4	51	NA	NA	0
PRPF8	ENSG00000197912	SPG7	protein_coding	34	4	69	NA	-0.331	0
PRPF8	ENSG00000198561	CTNND1	protein_coding	34	4	56	NA	NA	0
PRPF8	ENSG00000198799	LRIG2	protein_coding	34	4	45	0.694	NA	0
PRPF8	ENSG00000214655	ZSWIM8	protein_coding	34	4	66	1039	0.803	0
PRPF8	ENSG00000215041	NEURL4	protein_coding	34	4	52	NA	NA	0
PRPF8	ENSG00000221978	CCNL2	protein_coding	34	4	71	0.259	NA	0
PRPF8	ENSG00000255872	AL138752.2	protein_coding	34	4	59	NA	NA	0
PRPF8	ENSG00000257315	ZBED6	protein_coding	34	4	55	NA	-0.466	0
PRPF8	ENSG00000258366	RTEL1	protein_coding	34	4	61	-0.956	-0.601	0
PRPF8	ENSG00000268173	AC007192.1	protein_coding	34	4	58	NA	NA	0
PRPF8	ENSG00000273749	CYFIP1	protein_coding	34	4	55	NA	-0.777	0
PRPF8	ENSG00000283515	AC020915.5	protein_coding	34	4	60	NA	NA	0
PRPF8	ENSG00000003393	ALS2	protein_coding	33	4	51	0.472	NA	0
PRPF8	ENSG00000005483	KMT2E	protein_coding	33	4	51	-0.339	NA	0
PRPF8	ENSG00000008838	MED24	protein_coding	33	4	59	NA	-0.211	0
PRPF8	ENSG00000011304	PTBP1	protein_coding	33	4	71	-0.517	0.239	0
PRPF8	ENSG00000023191	RNH1	protein_coding	33	4	60	NA	0.842	0
PRPF8	ENSG00000055332	EIF2AK2	protein_coding	33	4	48	NA	NA	0
PRPF8	ENSG00000059588	TARBP1	protein_coding	33	4	47	NA	-1228	0
PRPF8	ENSG00000061936	SFSWAP	protein_coding	33	4	67	NA	0.381	0
PRPF8	ENSG00000073584	SMARCE1	protein_coding	33	4	61	NA	0.361	0
PRPF8	ENSG00000077684	JADE1	protein_coding	33	4	54	-1210	NA	0
PRPF8	ENSG00000077782	FGFR1	protein_coding	33	2	50	-0.938	NA	0
PRPF8	ENSG00000091513	TF	protein_coding	33	2	54	NA	NA	0
PRPF8	ENSG00000095787	WAC	protein_coding	33	4	52	NA	NA	0
PRPF8	ENSG00000096433	ITPR3	protein_coding	33	4	49	NA	-0.607	0
PRPF8	ENSG00000100099	HPS4	protein_coding	33	4	65	NA	-0.586	0
PRPF8	ENSG00000100226	GTPBP1	protein_coding	33	4	55	-0.621	-0.813	0
PRPF8	ENSG00000100503	NIN	protein_coding	33	4	43	0.654	NA	0
PRPF8	ENSG00000100697	DICER1	protein_coding	33	4	49	-0.857	-0.501	0
PRPF8	ENSG00000100867	DHRS2	protein_coding	33	4	60	-0.508	-0.398	0
PRPF8	ENSG00000100934	SEC23A	protein_coding	33	4	51	NA	NA	0
PRPF8	ENSG00000101199	ARFGAP1	protein_coding	33	4	65	NA	0.814	0
PRPF8	ENSG00000104960	PTOV1	protein_coding	33	4	63	NA	NA	0
PRPF8	ENSG00000107938	EDRF1	protein_coding	33	4	49	NA	NA	0
PRPF8	ENSG00000108465	CDK5RAP3	protein_coding	33	4	67	NA	-0.632	0
PRPF8	ENSG00000109332	UBE2D3	protein_coding	33	4	58	NA	0.288	0
PRPF8	ENSG00000110172	CHORDC1	protein_coding	33	4	58	NA	0.285	0
PRPF8	ENSG00000110888	CAPRIN2	protein_coding	33	4	47	NA	-0.692	0
PRPF8	ENSG00000111300	NAA25	protein_coding	33	4	53	NA	NA	0
PRPF8	ENSG00000112146	FBXO9	protein_coding	33	4	53	0.351	0.637	0
PRPF8	ENSG00000112282	MED23	protein_coding	33	4	49	0.522	0.391	0
PRPF8	ENSG00000116198	CEP104	protein_coding	33	4	46	NA	NA	0
PRPF8	ENSG00000116497	S100PBP	protein_coding	33	4	48	-0.745	-0.728	0
PRPF8	ENSG00000116679	IVNS1ABP	protein_coding	33	4	67	-0.420	-0.562	0
PRPF8	ENSG00000119321	FKBP15	protein_coding	33	4	54	NA	-0.380	0
PRPF8	ENSG00000121741	ZMYM2	protein_coding	33	4	52	NA	-0.875	0
PRPF8	ENSG00000125944	HNRNPR	protein_coding	33	4	65	-0.827	NA	0
PRPF8	ENSG00000128159	TUBGCP6	protein_coding	33	4	53	NA	NA	0
PRPF8	ENSG00000128641	MYO1B	protein_coding	33	2	45	0.251	NA	0
PRPF8	ENSG00000130827	PLXNA3	protein_coding	33	4	47	NA	-0.716	0
PRPF8	ENSG00000132361	CLUH	protein_coding	33	4	55	NA	NA	0
PRPF8	ENSG00000132466	ANKRD17	protein_coding	33	4	49	-0.288	-0.155	0
PRPF8	ENSG00000133026	MYH10	protein_coding	33	4	54	-0.899	-0.675	0
PRPF8	ENSG00000133313	CNDP2	protein_coding	33	4	54	-0.454	-0.353	0
PRPF8	ENSG00000134250	NOTCH2	protein_coding	33	2	46	0.532	2112	0
PRPF8	ENSG00000134318	ROCK2	protein_coding	33	4	50	NA	NA	0
PRPF8	ENSG00000135596	MICAL1	protein_coding	33	4	50	0.713	NA	0
PRPF8	ENSG00000135775	COG2	protein_coding	33	4	53	0.475	0.452	0
PRPF8	ENSG00000135945	REV1	protein_coding	33	4	46	NA	NA	0
PRPF8	ENSG00000136205	TNS3	protein_coding	33	2	47	0.411	NA	0
PRPF8	ENSG00000136813	ECPAS	protein_coding	33	4	57	-0.606	-0.515	0
PRPF8	ENSG00000138246	DNAJC13	protein_coding	33	4	49	NA	NA	0
PRPF8	ENSG00000139218	SCAF11	protein_coding	33	4	54	NA	-0.244	0
PRPF8	ENSG00000141068	KSR1	protein_coding	33	4	61	0.694	-0.681	0
PRPF8	ENSG00000142002	DPP9	protein_coding	33	4	55	NA	0.320	0
PRPF8	ENSG00000142330	CAPN10	protein_coding	33	4	55	NA	NA	0
PRPF8	ENSG00000143515	ATP8B2	protein_coding	33	4	53	NA	-0.862	0
PRPF8	ENSG00000144357	UBR3	protein_coding	33	4	48	NA	NA	0
PRPF8	ENSG00000144504	ANKMY1	protein_coding	33	4	55	NA	NA	0
PRPF8	ENSG00000144554	FANCD2	protein_coding	33	4	54	-1938	-0.676	0
PRPF8	ENSG00000145675	PIK3R1	protein_coding	33	4	48	NA	0.982	0
PRPF8	ENSG00000149182	ARFGAP2	protein_coding	33	4	58	NA	-0.682	0
PRPF8	ENSG00000149476	TKFC	protein_coding	33	4	57	-1142	-0.787	0
PRPF8	ENSG00000150961	SEC24D	protein_coding	33	4	54	-0.340	NA	0
PRPF8	ENSG00000154222	CC2D1B	protein_coding	33	4	58	0.742	0.684	0
PRPF8	ENSG00000156860	FBRS	protein_coding	33	4	66	NA	0.909	0
PRPF8	ENSG00000156931	VPS8	protein_coding	33	4	44	0.678	NA	0
PRPF8	ENSG00000160072	ATAD3B	protein_coding	33	4	72	NA	0.588	0
PRPF8	ENSG00000160633	SAFB	protein_coding	33	4	62	-0.310	0.502	0
PRPF8	ENSG00000160949	TONSL	protein_coding	33	4	57	-1041	NA	0
PRPF8	ENSG00000163161	ERCC3	protein_coding	33	4	55	NA	0.362	0
PRPF8	ENSG00000163399	ATP1A1	protein_coding	33	4	58	NA	-0.529	0
PRPF8	ENSG00000163486	SRGAP2	protein_coding	33	4	51	NA	NA	0
PRPF8	ENSG00000165699	TSC1	protein_coding	33	4	55	NA	0.629	0
PRPF8	ENSG00000166164	BRD7	protein_coding	33	4	53	-0.358	NA	0
PRPF8	ENSG00000166598	HSP90B1	protein_coding	33	4	66	-1203	NA	0
PRPF8	ENSG00000169045	HNRNPH1	protein_coding	33	4	69	-0.333	0.149	0
PRPF8	ENSG00000173020	GRK2	protein_coding	33	4	60	NA	NA	0
PRPF8	ENSG00000173638	SLC19A1	protein_coding	33	4	47	-0.970	NA	0
PRPF8	ENSG00000175166	PSMD2	protein_coding	33	4	55	-0.181	0.130	0
PRPF8	ENSG00000176715	ACSF3	protein_coding	33	4	51	NA	-0.465	0
PRPF8	ENSG00000178188	SH2B1	protein_coding	33	4	71	NA	NA	0
PRPF8	ENSG00000178904	DPY19L3	protein_coding	33	4	57	NA	-0.699	0
PRPF8	ENSG00000178971	CTC1	protein_coding	33	4	48	0.775	-0.689	0
PRPF8	ENSG00000183963	SMTN	protein_coding	33	4	55	1007	NA	0
PRPF8	ENSG00000185813	PCYT2	protein_coding	33	4	70	NA	NA	0
PRPF8	ENSG00000187555	USP7	protein_coding	33	4	59	-0.465	0.311	0
PRPF8	ENSG00000197530	MIB2	protein_coding	33	4	56	NA	NA	0
PRPF8	ENSG00000198466	ZNF587	protein_coding	33	4	43	NA	-0.564	0
PRPF8	ENSG00000213240	AC239799.1	protein_coding	33	4	58	NA	NA	0
PRPF8	ENSG00000258677	AC022826.2	protein_coding	33	4	43	NA	2300	0
PRPF8	ENSG00000263001	GTF2I	protein_coding	33	4	63	NA	-0.339	0
PRPF8	ENSG00000264058	AC073508.2	protein_coding	33	4	61	NA	NA	0
PRPF8	ENSG00000267618	AC004223.3	protein_coding	33	4	56	NA	NA	0
PRPF8	ENSG00000272391	POM121C	protein_coding	33	4	59	NA	NA	0
PRPF8	ENSG00000283228	AC068547.1	protein_coding	33	4	52	NA	NA	0
PRPF8	ENSG00000285245	AL162417.1	protein_coding	33	4	50	NA	NA	0
PRPF8	ENSG00000003436	TFPI	protein_coding	32	4	53	NA	1168	0
PRPF8	ENSG00000005700	IBTK	protein_coding	32	4	55	NA	NA	0
PRPF8	ENSG00000011021	CLCN6	protein_coding	32	4	51	NA	NA	0
PRPF8	ENSG00000011451	WIZ	protein_coding	32	4	61	NA	NA	0
PRPF8	ENSG00000024048	UBR2	protein_coding	32	4	51	NA	NA	0
PRPF8	ENSG00000039319	ZFYVE16	protein_coding	32	4	43	NA	NA	0
PRPF8	ENSG00000054267	ARID4B	protein_coding	32	4	52	NA	0.276	0
PRPF8	ENSG00000065029	ZNF76	protein_coding	32	4	49	NA	NA	0
PRPF8	ENSG00000067369	TP53BP1	protein_coding	32	4	46	NA	NA	0
PRPF8	ENSG00000072778	ACADVL	protein_coding	32	4	68	-0.878	-0.800	0
PRPF8	ENSG00000083168	KAT6A	protein_coding	32	4	47	-0.541	NA	0
PRPF8	ENSG00000084234	APLP2	protein_coding	32	4	54	NA	NA	0
PRPF8	ENSG00000090975	PITPNM2	protein_coding	32	4	47	0.898	NA	0
PRPF8	ENSG00000100592	DAAM1	protein_coding	32	4	44	NA	NA	0
PRPF8	ENSG00000101040	ZMYND8	protein_coding	32	4	49	-0.485	-1227	0
PRPF8	ENSG00000101558	VAPA	protein_coding	32	4	61	0.248	0.324	0
PRPF8	ENSG00000103540	CCP110	protein_coding	32	4	49	-0.342	-0.507	0
PRPF8	ENSG00000108946	PRKAR1A	protein_coding	32	4	52	0.466	NA	0
PRPF8	ENSG00000109756	RAPGEF2	protein_coding	32	4	39	NA	0.475	0
PRPF8	ENSG00000113569	NUP155	protein_coding	32	4	47	-0.556	-0.257	0
PRPF8	ENSG00000116127	ALMS1	protein_coding	32	4	44	-0.488	-0.660	0
PRPF8	ENSG00000116580	GON4L	protein_coding	32	4	50	0.527	NA	0
PRPF8	ENSG00000116584	ARHGEF2	protein_coding	32	4	67	-0.722	NA	0
PRPF8	ENSG00000119772	DNMT3A	protein_coding	32	4	51	NA	-0.989	0
PRPF8	ENSG00000120802	TMPO	protein_coding	32	4	52	-1210	NA	0
PRPF8	ENSG00000122299	ZC3H7A	protein_coding	32	4	55	NA	-0.275	0
PRPF8	ENSG00000124198	ARFGEF2	protein_coding	32	4	51	-0.253	NA	0
PRPF8	ENSG00000124201	ZNFX1	protein_coding	32	4	61	1039	0.544	0
PRPF8	ENSG00000127022	CANX	protein_coding	32	4	53	-1545	NA	0
PRPF8	ENSG00000127511	SIN3B	protein_coding	32	4	60	NA	0.351	0
PRPF8	ENSG00000130164	LDLR	protein_coding	32	4	71	-0.472	-1041	0
PRPF8	ENSG00000133706	LARS	protein_coding	32	4	59	NA	-0.648	0
PRPF8	ENSG00000133812	SBF2	protein_coding	32	4	39	NA	NA	0
PRPF8	ENSG00000134324	LPIN1	protein_coding	32	4	51	0.528	-0.418	0
PRPF8	ENSG00000134369	NAV1	protein_coding	32	2	37	NA	-1452	0
PRPF8	ENSG00000137337	MDC1	protein_coding	32	4	52	-0.553	-0.327	0
PRPF8	ENSG00000140526	ABHD2	protein_coding	32	4	50	0.890	-0.670	0
PRPF8	ENSG00000140992	PDPK1	protein_coding	32	4	54	0.478	0.474	0
PRPF8	ENSG00000147416	ATP6V1B2	protein_coding	32	4	57	NA	1074	0
PRPF8	ENSG00000150527	CTAGE5	protein_coding	32	4	40	0.557	0.485	0
PRPF8	ENSG00000154864	PIEZO2	protein_coding	32	2	42	NA	NA	0
PRPF8	ENSG00000156650	KAT6B	protein_coding	32	4	47	-0.693	NA	0
PRPF8	ENSG00000157800	SLC37A3	protein_coding	32	4	60	NA	NA	0
PRPF8	ENSG00000161217	PCYT1A	protein_coding	32	4	57	NA	NA	0
PRPF8	ENSG00000165288	BRWD3	protein_coding	32	4	43	NA	-1050	0
PRPF8	ENSG00000166444	ST5	protein_coding	32	2	47	0.526	NA	0
PRPF8	ENSG00000166987	MBD6	protein_coding	32	4	50	NA	0.539	0
PRPF8	ENSG00000168758	SEMA4C	protein_coding	32	4	58	NA	NA	0
PRPF8	ENSG00000172037	LAMB2	protein_coding	32	4	50	NA	-0.705	0
PRPF8	ENSG00000174444	RPL4	protein_coding	32	4	87	-0.435	-0.073	0
PRPF8	ENSG00000174501	ANKRD36C	protein_coding	32	4	43	NA	-1272	0
PRPF8	ENSG00000177731	FLII	protein_coding	32	4	56	NA	NA	0
PRPF8	ENSG00000183117	CSMD1	protein_coding	32	2	38	NA	-0.596	0
PRPF8	ENSG00000185101	ANO9	protein_coding	32	4	69	0.575	-1545	0
PRPF8	ENSG00000196208	GREB1	protein_coding	32	2	55	-0.289	NA	0
PRPF8	ENSG00000196961	AP2A1	protein_coding	32	4	51	NA	NA	0
PRPF8	ENSG00000197816	CCDC180	protein_coding	32	4	55	NA	-1942	0
PRPF8	ENSG00000198162	MAN1A2	protein_coding	32	4	51	-0.580	-0.294	0
PRPF8	ENSG00000198589	LRBA	protein_coding	32	4	44	NA	-1140	0
PRPF8	ENSG00000198947	DMD	protein_coding	32	4	43	NA	NA	0
PRPF8	ENSG00000203546	AL139353.1	protein_coding	32	4	54	NA	NA	0
PRPF8	ENSG00000204394	VARS	protein_coding	32	4	52	NA	-0.340	0
PRPF8	ENSG00000206560	ANKRD28	protein_coding	32	4	51	NA	-0.383	0
PRPF8	ENSG00000213918	DNASE1	protein_coding	32	4	45	1026	NA	0
PRPF8	ENSG00000214078	CPNE1	protein_coding	32	4	65	-0.244	NA	0
PRPF8	ENSG00000242802	AP5Z1	protein_coding	32	4	59	1056	1826	0
PRPF8	ENSG00000005156	LIG3	protein_coding	31	4	49	-1049	-0.639	0
PRPF8	ENSG00000006607	FARP2	protein_coding	31	4	50	NA	-0.705	0
PRPF8	ENSG00000011405	PIK3C2A	protein_coding	31	4	49	NA	NA	0
PRPF8	ENSG00000025796	SEC63	protein_coding	31	4	43	NA	NA	0
PRPF8	ENSG00000026297	RNASET2	protein_coding	31	4	60	-2205	-1002	0
PRPF8	ENSG00000032444	PNPLA6	protein_coding	31	4	47	NA	NA	0
PRPF8	ENSG00000033030	ZCCHC8	protein_coding	31	4	49	NA	0.844	0
PRPF8	ENSG00000048649	RSF1	protein_coding	31	4	51	0.261	NA	0
PRPF8	ENSG00000064687	ABCA7	protein_coding	31	4	54	-1111	-1361	0
PRPF8	ENSG00000065000	AP3D1	protein_coding	31	4	55	NA	0.244	0
PRPF8	ENSG00000070061	ELP1	protein_coding	31	4	42	0.092	NA	0
PRPF8	ENSG00000070159	PTPN3	protein_coding	31	2	43	NA	NA	0
PRPF8	ENSG00000075413	MARK3	protein_coding	31	4	55	0.292	NA	0
PRPF8	ENSG00000075420	FNDC3B	protein_coding	31	4	52	-0.586	-0.320	0
PRPF8	ENSG00000079277	MKNK1	protein_coding	31	4	55	NA	NA	0
PRPF8	ENSG00000080824	HSP90AA1	protein_coding	31	4	72	-0.424	-0.343	0
PRPF8	ENSG00000089094	KDM2B	protein_coding	31	4	64	-0.629	NA	0
PRPF8	ENSG00000089597	GANAB	protein_coding	31	4	45	-0.639	-0.666	0
PRPF8	ENSG00000095319	NUP188	protein_coding	31	4	63	-0.915	-0.384	0
PRPF8	ENSG00000100150	DEPDC5	protein_coding	31	4	39	NA	NA	0
PRPF8	ENSG00000100815	TRIP11	protein_coding	31	4	41	NA	0.262	0
PRPF8	ENSG00000100897	DCAF11	protein_coding	31	4	49	NA	-0.236	0
PRPF8	ENSG00000103342	GSPT1	protein_coding	31	4	54	-0.221	0.207	0
PRPF8	ENSG00000104884	ERCC2	protein_coding	31	4	49	-0.433	-1020	0
PRPF8	ENSG00000105135	ILVBL	protein_coding	31	4	51	NA	NA	0
PRPF8	ENSG00000105483	CARD8	protein_coding	31	4	49	NA	NA	0
PRPF8	ENSG00000106397	PLOD3	protein_coding	31	4	59	NA	NA	0
PRPF8	ENSG00000108021	FAM208B	protein_coding	31	4	47	0.291	0.456	0
PRPF8	ENSG00000109920	FNBP4	protein_coding	31	4	54	-0.321	-0.321	0
PRPF8	ENSG00000110619	CARS	protein_coding	31	4	56	0.617	NA	0
PRPF8	ENSG00000111271	ACAD10	protein_coding	31	4	55	NA	-1527	0
PRPF8	ENSG00000115419	GLS	protein_coding	31	4	54	NA	NA	0
PRPF8	ENSG00000115687	PASK	protein_coding	31	4	47	-0.829	-0.813	0
PRPF8	ENSG00000119397	CNTRL	protein_coding	31	4	42	NA	-0.690	0
PRPF8	ENSG00000123066	MED13L	protein_coding	31	4	52	0.464	NA	0
PRPF8	ENSG00000123607	TTC21B	protein_coding	31	4	44	-0.226	-0.599	0
PRPF8	ENSG00000123908	2020-08-02	protein_coding	31	4	42	NA	-0.237	0
PRPF8	ENSG00000124181	PLCG1	protein_coding	31	4	51	-0.265	-0.890	0
PRPF8	ENSG00000125746	EML2	protein_coding	31	4	55	NA	-1545	0
PRPF8	ENSG00000128833	MYO5C	protein_coding	31	2	46	NA	NA	0
PRPF8	ENSG00000129657	SEC14L1	protein_coding	31	4	58	0.426	-0.604	0
PRPF8	ENSG00000132155	RAF1	protein_coding	31	4	54	-0.367	0.483	0
PRPF8	ENSG00000132199	ENOSF1	protein_coding	31	4	59	-0.440	-1599	0
PRPF8	ENSG00000132326	PER2	protein_coding	31	4	45	0.622	0.920	0
PRPF8	ENSG00000134283	PPHLN1	protein_coding	31	4	49	NA	NA	0
PRPF8	ENSG00000134317	GRHL1	protein_coding	31	4	46	NA	NA	0
PRPF8	ENSG00000134852	CLOCK	protein_coding	31	4	48	0.344	0.433	0
PRPF8	ENSG00000135679	MDM2	protein_coding	31	4	56	1001	0.195	0
PRPF8	ENSG00000135829	DHX9	protein_coding	31	4	47	-0.595	NA	0
PRPF8	ENSG00000135862	LAMC1	protein_coding	31	2	39	0.173	NA	0
PRPF8	ENSG00000135976	ANKRD36	protein_coding	31	4	52	NA	-1478	0
PRPF8	ENSG00000139437	TCHP	protein_coding	31	4	45	NA	NA	0
PRPF8	ENSG00000141002	TCF25	protein_coding	31	4	51	NA	NA	0
PRPF8	ENSG00000141644	MBD1	protein_coding	31	4	49	0.785	0.741	0
PRPF8	ENSG00000141664	ZCCHC2	protein_coding	31	4	47	-0.795	0.624	0
PRPF8	ENSG00000142661	MYOM3	protein_coding	31	2	41	NA	NA	0
PRPF8	ENSG00000143190	POU2F1	protein_coding	31	4	56	-0.888	-0.616	0
PRPF8	ENSG00000143549	TPM3	protein_coding	31	4	65	NA	0.252	0
PRPF8	ENSG00000143702	CEP170	protein_coding	31	4	40	NA	-0.396	0
PRPF8	ENSG00000143924	EML4	protein_coding	31	4	49	-0.366	NA	0
PRPF8	ENSG00000144674	GOLGA4	protein_coding	31	4	45	-0.646	0.260	0
PRPF8	ENSG00000146648	EGFR	protein_coding	31	2	43	1087	NA	0
PRPF8	ENSG00000147475	ERLIN2	protein_coding	31	4	53	-0.314	NA	0
PRPF8	ENSG00000147548	NSD3	protein_coding	31	4	49	-0.644	-0.582	0
PRPF8	ENSG00000148843	PDCD11	protein_coding	31	4	45	0.308	-0.284	0
PRPF8	ENSG00000149187	CELF1	protein_coding	31	4	54	-0.343	-0.184	0
PRPF8	ENSG00000149480	MTA2	protein_coding	31	4	51	0.350	0.513	0
PRPF8	ENSG00000150764	DIXDC1	protein_coding	31	4	45	NA	-0.736	0
PRPF8	ENSG00000153207	AHCTF1	protein_coding	31	4	52	NA	NA	0
PRPF8	ENSG00000154124	OTULIN	protein_coding	31	4	43	NA	NA	0
PRPF8	ENSG00000156976	EIF4A2	protein_coding	31	4	76	0.383	NA	0
PRPF8	ENSG00000159314	ARHGAP27	protein_coding	31	4	52	1100	0.735	0
PRPF8	ENSG00000160200	CBS	protein_coding	31	4	59	NA	-0.835	0
PRPF8	ENSG00000160695	VPS11	protein_coding	31	4	52	NA	NA	0
PRPF8	ENSG00000163050	COQ8A	protein_coding	31	4	55	-0.442	-0.657	0
PRPF8	ENSG00000164151	ICE1	protein_coding	31	4	46	NA	0.618	0
PRPF8	ENSG00000164754	RAD21	protein_coding	31	4	55	-0.626	0.361	0
PRPF8	ENSG00000164946	FREM1	protein_coding	31	2	44	NA	NA	0
PRPF8	ENSG00000166278	C2	protein_coding	31	4	41	NA	NA	0
PRPF8	ENSG00000166483	WEE1	protein_coding	31	4	51	-0.417	0.199	0
PRPF8	ENSG00000166507	NDST2	protein_coding	31	4	46	NA	-0.476	0
PRPF8	ENSG00000166887	VPS39	protein_coding	31	4	46	0.394	NA	0
PRPF8	ENSG00000168036	CTNNB1	protein_coding	31	4	55	NA	0.638	0
PRPF8	ENSG00000168385	2020-09-02	protein_coding	31	4	57	NA	NA	0
PRPF8	ENSG00000168827	GFM1	protein_coding	31	4	46	0.963	0.752	0
PRPF8	ENSG00000168970	JMJD7-PLA2G4B	protein_coding	31	4	58	NA	-1013	0
PRPF8	ENSG00000172845	SP3	protein_coding	31	4	56	NA	0.375	0
PRPF8	ENSG00000172943	PHF8	protein_coding	31	4	53	NA	NA	0
PRPF8	ENSG00000178295	GEN1	protein_coding	31	4	45	NA	NA	0
PRPF8	ENSG00000180182	MED14	protein_coding	31	4	46	-0.498	NA	0
PRPF8	ENSG00000184640	2020-09-09	protein_coding	31	4	51	NA	NA	0
PRPF8	ENSG00000186815	TPCN1	protein_coding	31	4	49	NA	-1161	0
PRPF8	ENSG00000187954	CYHR1	protein_coding	31	4	48	NA	NA	0
PRPF8	ENSG00000196678	ERI2	protein_coding	31	4	47	NA	NA	0
PRPF8	ENSG00000196730	DAPK1	protein_coding	31	4	60	NA	-0.505	0
PRPF8	ENSG00000196943	NOP9	protein_coding	31	4	50	0.229	NA	0
PRPF8	ENSG00000197558	SSPO	protein_coding	31	4	38	NA	NA	0
PRPF8	ENSG00000198625	MDM4	protein_coding	31	4	54	NA	NA	0
PRPF8	ENSG00000198836	OPA1	protein_coding	31	4	45	NA	NA	0
PRPF8	ENSG00000255152	MSH5-SAPCD1	protein_coding	31	4	59	-2059	-1656	0
PRPF8	ENSG00000269897	COMMD3-BMI1	protein_coding	31	4	58	NA	NA	0
PRPF8	ENSG00000270106	TSNAX-DISC1	protein_coding	31	4	46	NA	NA	0
PRPF8	ENSG00000272916	AC022400.6	protein_coding	31	4	46	NA	NA	0
PRPF8	ENSG00000274276	CBSL	protein_coding	31	4	59	NA	NA	0
PRPF8	ENSG00000278053	DDX52	protein_coding	31	4	49	0.481	0.277	0
PRPF8	ENSG00000003402	CFLAR	protein_coding	30	4	59	NA	-0.589	0
PRPF8	ENSG00000028203	VEZT	protein_coding	30	4	51	0.711	NA	0
PRPF8	ENSG00000033178	UBA6	protein_coding	30	4	42	0.501	NA	0
PRPF8	ENSG00000062650	WAPL	protein_coding	30	4	39	NA	0.359	0
PRPF8	ENSG00000065060	UHRF1BP1	protein_coding	30	4	56	NA	-0.675	0
PRPF8	ENSG00000068903	SIRT2	protein_coding	30	4	48	NA	NA	0
PRPF8	ENSG00000072274	TFRC	protein_coding	30	4	56	NA	-0.793	0
PRPF8	ENSG00000072364	AFF4	protein_coding	30	4	58	NA	NA	0
PRPF8	ENSG00000074356	NCBP3	protein_coding	30	4	44	NA	-0.493	0
PRPF8	ENSG00000077232	DNAJC10	protein_coding	30	4	42	NA	NA	0
PRPF8	ENSG00000083097	DOPEY1	protein_coding	30	4	39	0.646	1218	0
PRPF8	ENSG00000083896	YTHDC1	protein_coding	30	4	45	NA	0.495	0
PRPF8	ENSG00000085224	ATRX	protein_coding	30	4	39	NA	NA	0
PRPF8	ENSG00000086015	MAST2	protein_coding	30	4	49	0.436	-0.254	0
PRPF8	ENSG00000090924	PLEKHG2	protein_coding	30	4	61	NA	NA	0
PRPF8	ENSG00000092439	TRPM7	protein_coding	30	4	43	-0.503	-0.446	0
PRPF8	ENSG00000095015	MAP3K1	protein_coding	30	4	42	NA	0.532	0
PRPF8	ENSG00000100023	PPIL2	protein_coding	30	4	63	-0.244	-0.199	0
PRPF8	ENSG00000100316	RPL3	protein_coding	30	4	70	-0.410	NA	0
PRPF8	ENSG00000100441	KHNYN	protein_coding	30	4	58	-0.103	-0.418	0
PRPF8	ENSG00000101639	CEP192	protein_coding	30	4	46	-0.820	-0.688	0
PRPF8	ENSG00000101752	MIB1	protein_coding	30	4	46	NA	-0.782	0
PRPF8	ENSG00000102858	MGRN1	protein_coding	30	4	48	NA	NA	0
PRPF8	ENSG00000102910	LONP2	protein_coding	30	4	48	0.290	-0.305	0
PRPF8	ENSG00000103365	GGA2	protein_coding	30	4	61	-0.572	-0.450	0
PRPF8	ENSG00000103426	CORO7-PAM16	protein_coding	30	4	49	NA	NA	0
PRPF8	ENSG00000105373	NOP53	protein_coding	30	4	52	NA	NA	0
PRPF8	ENSG00000105486	LIG1	protein_coding	30	4	47	-1035	-0.682	0
PRPF8	ENSG00000105778	AVL9	protein_coding	30	4	53	-0.612	-0.370	0
PRPF8	ENSG00000106144	CASP2	protein_coding	30	4	52	-0.400	NA	0
PRPF8	ENSG00000107937	GTPBP4	protein_coding	30	4	46	NA	0.325	0
PRPF8	ENSG00000107957	SH3PXD2A	protein_coding	30	4	46	NA	-1020	0
PRPF8	ENSG00000108389	MTMR4	protein_coding	30	4	50	NA	NA	0
PRPF8	ENSG00000108469	RECQL5	protein_coding	30	4	54	NA	-0.290	0
PRPF8	ENSG00000111077	TNS2	protein_coding	30	4	45	NA	NA	0
PRPF8	ENSG00000114331	ACAP2	protein_coding	30	4	53	NA	-0.217	0
PRPF8	ENSG00000115286	NDUFS7	protein_coding	30	4	56	NA	NA	0
PRPF8	ENSG00000117139	KDM5B	protein_coding	30	4	46	NA	-0.345	0
PRPF8	ENSG00000118482	PHF3	protein_coding	30	4	46	-0.376	-0.479	0
PRPF8	ENSG00000118900	UBN1	protein_coding	30	4	50	-0.432	0.214	0
PRPF8	ENSG00000119906	SLF2	protein_coding	30	4	40	NA	NA	0
PRPF8	ENSG00000120709	FAM53C	protein_coding	30	4	43	NA	0.727	0
PRPF8	ENSG00000122515	ZMIZ2	protein_coding	30	4	58	0.910	NA	0
PRPF8	ENSG00000122779	TRIM24	protein_coding	30	4	53	-0.821	NA	0
PRPF8	ENSG00000122786	CALD1	protein_coding	30	2	40	0.403	NA	0
PRPF8	ENSG00000126215	XRCC3	protein_coding	30	4	37	-1896	NA	0
PRPF8	ENSG00000130589	HELZ2	protein_coding	30	4	50	1373	1445	0
PRPF8	ENSG00000131697	NPHP4	protein_coding	30	4	57	NA	NA	0
PRPF8	ENSG00000132128	LRRC41	protein_coding	30	4	50	NA	NA	0
PRPF8	ENSG00000132680	KHDC4	protein_coding	30	4	52	NA	0.172	0
PRPF8	ENSG00000133103	COG6	protein_coding	30	4	40	0.615	NA	0
PRPF8	ENSG00000133612	AGAP3	protein_coding	30	4	59	NA	NA	0
PRPF8	ENSG00000134313	KIDINS220	protein_coding	30	4	42	0.355	NA	0
PRPF8	ENSG00000135048	TMEM2	protein_coding	30	4	50	0.639	NA	0
PRPF8	ENSG00000135821	GLUL	protein_coding	30	4	70	0.156	-0.706	0
PRPF8	ENSG00000137822	TUBGCP4	protein_coding	30	4	54	NA	NA	0
PRPF8	ENSG00000137871	ZNF280D	protein_coding	30	4	42	NA	NA	0
PRPF8	ENSG00000139116	KIF21A	protein_coding	30	4	39	NA	NA	0
PRPF8	ENSG00000140299	BNIP2	protein_coding	30	4	47	0.194	0.656	0
PRPF8	ENSG00000140632	GLYR1	protein_coding	30	4	56	-0.400	NA	0
PRPF8	ENSG00000141258	SGSM2	protein_coding	30	4	51	NA	-0.346	0
PRPF8	ENSG00000141279	NPEPPS	protein_coding	30	4	65	NA	-0.298	0
PRPF8	ENSG00000143322	ABL2	protein_coding	30	4	52	NA	0.249	0
PRPF8	ENSG00000144524	COPS7B	protein_coding	30	4	46	-0.295	NA	0
PRPF8	ENSG00000145016	RUBCN	protein_coding	30	4	43	NA	NA	0
PRPF8	ENSG00000145868	FBXO38	protein_coding	30	4	52	NA	NA	0
PRPF8	ENSG00000150995	ITPR1	protein_coding	30	4	43	NA	NA	0
PRPF8	ENSG00000151150	ANK3	protein_coding	30	2	32	NA	NA	0
PRPF8	ENSG00000151338	MIPOL1	protein_coding	30	4	52	NA	NA	0
PRPF8	ENSG00000152234	ATP5F1A	protein_coding	30	4	50	-0.565	NA	0
PRPF8	ENSG00000153560	UBP1	protein_coding	30	4	59	0.236	NA	0
PRPF8	ENSG00000158023	WDR66	protein_coding	30	4	43	1987	NA	0
PRPF8	ENSG00000158545	ZC3H18	protein_coding	30	4	53	NA	0.937	0
PRPF8	ENSG00000159131	GART	protein_coding	30	4	68	-0.516	-0.158	0
PRPF8	ENSG00000159399	HK2	protein_coding	30	4	48	-2791	-1878	0
PRPF8	ENSG00000160710	ADAR	protein_coding	30	4	59	-0.250	-0.126	0
PRPF8	ENSG00000161204	ABCF3	protein_coding	30	4	55	0.476	0.372	0
PRPF8	ENSG00000162613	FUBP1	protein_coding	30	4	58	-0.520	NA	0
PRPF8	ENSG00000162688	AGL	protein_coding	30	4	43	NA	NA	0
PRPF8	ENSG00000162909	CAPN2	protein_coding	30	4	46	0.774	-0.440	0
PRPF8	ENSG00000163635	ATXN7	protein_coding	30	4	43	NA	NA	0
PRPF8	ENSG00000163930	BAP1	protein_coding	30	4	52	NA	0.657	0
PRPF8	ENSG00000164741	DLC1	protein_coding	30	4	45	NA	NA	0
PRPF8	ENSG00000165271	NOL6	protein_coding	30	4	48	NA	0.399	0
PRPF8	ENSG00000168765	GSTM4	protein_coding	30	4	54	NA	-0.388	0
PRPF8	ENSG00000168872	DDX19A	protein_coding	30	4	57	NA	NA	0
PRPF8	ENSG00000169967	MAP3K2	protein_coding	30	4	43	NA	0.496	0
PRPF8	ENSG00000171490	RSL1D1	protein_coding	30	4	58	NA	0.660	0
PRPF8	ENSG00000172046	USP19	protein_coding	30	4	40	NA	NA	0
PRPF8	ENSG00000173327	MAP3K11	protein_coding	30	4	63	NA	0.964	0
PRPF8	ENSG00000173898	SPTBN2	protein_coding	30	4	41	0.513	NA	0
PRPF8	ENSG00000175054	ATR	protein_coding	30	4	47	NA	-0.378	0
PRPF8	ENSG00000175455	CCDC14	protein_coding	30	4	55	NA	-0.748	0
PRPF8	ENSG00000177225	GATD1	protein_coding	30	4	60	-0.318	-0.455	0
PRPF8	ENSG00000177311	ZBTB38	protein_coding	30	4	47	-0.421	NA	0
PRPF8	ENSG00000180357	ZNF609	protein_coding	30	4	38	NA	-0.852	0
PRPF8	ENSG00000182472	CAPN12	protein_coding	30	4	39	NA	-1415	0
PRPF8	ENSG00000183751	TBL3	protein_coding	30	4	53	NA	NA	0
PRPF8	ENSG00000184014	DENND5A	protein_coding	30	4	56	-0.223	-0.733	0
PRPF8	ENSG00000185624	P4HB	protein_coding	30	4	65	-0.925	NA	0
PRPF8	ENSG00000188153	COL4A5	protein_coding	30	3	43	0.382	NA	0
PRPF8	ENSG00000196233	LCOR	protein_coding	30	4	47	NA	NA	0
PRPF8	ENSG00000198380	GFPT1	protein_coding	30	4	51	NA	NA	0
PRPF8	ENSG00000198586	TLK1	protein_coding	30	4	47	NA	NA	0
PRPF8	ENSG00000198862	LTN1	protein_coding	30	4	42	NA	NA	0
PRPF8	ENSG00000204590	GNL1	protein_coding	30	4	55	NA	NA	0
PRPF8	ENSG00000213614	HEXA	protein_coding	30	4	54	NA	NA	0
PRPF8	ENSG00000225697	SLC26A6	protein_coding	30	4	60	-0.331	-0.505	0
PRPF8	ENSG00000243207	PPAN-P2RY11	protein_coding	30	4	54	NA	NA	0
PRPF8	ENSG00000260272	AC093525.2	protein_coding	30	4	50	NA	NA	0
PRPF8	ENSG00000269858	EGLN2	protein_coding	30	4	53	NA	NA	0
PRPF8	ENSG00000285130	AL358113.1	protein_coding	30	4	50	NA	NA	0
PRPF8	ENSG00000285258	ATXN7	protein_coding	30	4	43	NA	NA	0
PRPF8	ENSG00000001630	CYP51A1	protein_coding	29	4	50	NA	-0.584	0
PRPF8	ENSG00000009830	POMT2	protein_coding	29	4	44	NA	NA	0
PRPF8	ENSG00000012817	KDM5D	protein_coding	29	2	33	0.453	NA	0
PRPF8	ENSG00000023839	ABCC2	protein_coding	29	2	36	NA	NA	0
PRPF8	ENSG00000033867	SLC4A7	protein_coding	29	4	40	NA	-1206	0
PRPF8	ENSG00000044446	PHKA2	protein_coding	29	4	51	-0.785	-1132	0
PRPF8	ENSG00000051341	POLQ	protein_coding	29	4	46	-1886	-0.685	0
PRPF8	ENSG00000051825	MPHOSPH9	protein_coding	29	4	50	-0.675	-0.439	0
PRPF8	ENSG00000052126	PLEKHA5	protein_coding	29	4	42	NA	-0.666	0
PRPF8	ENSG00000053900	ANAPC4	protein_coding	29	4	50	0.342	NA	0
PRPF8	ENSG00000066084	DIP2B	protein_coding	29	4	54	-0.376	NA	0
PRPF8	ENSG00000066279	ASPM	protein_coding	29	4	50	-1815	-0.264	0
PRPF8	ENSG00000071626	DAZAP1	protein_coding	29	4	57	-0.581	NA	0
PRPF8	ENSG00000073350	LLGL2	protein_coding	29	4	51	1279	NA	0
PRPF8	ENSG00000077254	USP33	protein_coding	29	4	42	0.387	NA	0
PRPF8	ENSG00000080815	PSEN1	protein_coding	29	4	40	0.423	NA	0
PRPF8	ENSG00000080845	DLGAP4	protein_coding	29	4	41	0.373	NA	0
PRPF8	ENSG00000082258	CCNT2	protein_coding	29	4	54	0.741	0.463	0
PRPF8	ENSG00000089159	PXN	protein_coding	29	4	38	NA	0.434	0
PRPF8	ENSG00000090686	USP48	protein_coding	29	4	58	NA	-0.684	0
PRPF8	ENSG00000092098	RNF31	protein_coding	29	4	44	NA	NA	0
PRPF8	ENSG00000092445	TYRO3	protein_coding	29	4	42	NA	NA	0
PRPF8	ENSG00000100519	PSMC6	protein_coding	29	4	57	NA	0.409	0
PRPF8	ENSG00000100714	MTHFD1	protein_coding	29	4	40	-1168	-0.304	0
PRPF8	ENSG00000103222	ABCC1	protein_coding	29	4	47	0.184	-0.915	0
PRPF8	ENSG00000103353	UBFD1	protein_coding	29	4	53	NA	NA	0
PRPF8	ENSG00000104738	MCM4	protein_coding	29	4	49	-1925	-0.447	0
PRPF8	ENSG00000104852	SNRNP70	protein_coding	29	4	56	NA	NA	0
PRPF8	ENSG00000104936	DMPK	protein_coding	29	4	46	0.449	0.490	0
PRPF8	ENSG00000105323	HNRNPUL1	protein_coding	29	4	52	-0.997	-0.213	0
PRPF8	ENSG00000106443	PHF14	protein_coding	29	4	42	NA	-0.351	0
PRPF8	ENSG00000107262	BAG1	protein_coding	29	4	43	NA	NA	0
PRPF8	ENSG00000108840	HDAC5	protein_coding	29	4	39	0.837	NA	0
PRPF8	ENSG00000108963	DPH1	protein_coding	29	4	52	NA	NA	0
PRPF8	ENSG00000109606	DHX15	protein_coding	29	4	47	NA	0.489	0
PRPF8	ENSG00000110395	CBL	protein_coding	29	4	45	NA	-0.599	0
PRPF8	ENSG00000110429	FBXO3	protein_coding	29	4	48	NA	NA	0
PRPF8	ENSG00000110844	PRPF40B	protein_coding	29	4	41	NA	NA	0
PRPF8	ENSG00000111011	RSRC2	protein_coding	29	4	54	NA	NA	0
PRPF8	ENSG00000113163	COL4A3BP	protein_coding	29	4	35	0.461	NA	0
PRPF8	ENSG00000114030	KPNA1	protein_coding	29	4	42	1022	0.620	0
PRPF8	ENSG00000114554	PLXNA1	protein_coding	29	4	44	NA	NA	0
PRPF8	ENSG00000114650	SCAP	protein_coding	29	4	45	0.506	NA	0
PRPF8	ENSG00000115207	GTF3C2	protein_coding	29	4	43	NA	NA	0
PRPF8	ENSG00000116747	TROVE2	protein_coding	29	4	45	0.677	0.262	0
PRPF8	ENSG00000117335	CD46	protein_coding	29	4	64	NA	-0.837	0
PRPF8	ENSG00000117597	DIEXF	protein_coding	29	4	51	NA	0.642	0
PRPF8	ENSG00000125637	PSD4	protein_coding	29	4	50	0.533	NA	0
PRPF8	ENSG00000128881	TTBK2	protein_coding	29	4	38	NA	-0.823	0
PRPF8	ENSG00000129493	HEATR5A	protein_coding	29	4	48	0.226	NA	0
PRPF8	ENSG00000131504	DIAPH1	protein_coding	29	4	45	NA	NA	0
PRPF8	ENSG00000132182	NUP210	protein_coding	29	4	53	-0.867	-1341	0
PRPF8	ENSG00000134684	YARS	protein_coding	29	4	55	0.330	NA	0
PRPF8	ENSG00000134759	ELP2	protein_coding	29	4	50	NA	-0.548	0
PRPF8	ENSG00000134910	STT3A	protein_coding	29	4	45	-0.390	NA	0
PRPF8	ENSG00000135297	MTO1	protein_coding	29	4	56	NA	NA	0
PRPF8	ENSG00000135913	USP37	protein_coding	29	4	43	-0.635	NA	0
PRPF8	ENSG00000136270	TBRG4	protein_coding	29	4	67	-0.742	NA	0
PRPF8	ENSG00000137770	CTDSPL2	protein_coding	29	4	48	-0.810	NA	0
PRPF8	ENSG00000138398	PPIG	protein_coding	29	4	61	-0.607	NA	0
PRPF8	ENSG00000139636	LMBR1L	protein_coding	29	4	48	NA	NA	0
PRPF8	ENSG00000140416	TPM1	protein_coding	29	4	43	0.397	NA	0
PRPF8	ENSG00000140553	UNC45A	protein_coding	29	4	52	NA	NA	0
PRPF8	ENSG00000140859	KIFC3	protein_coding	29	4	60	0.924	NA	0
PRPF8	ENSG00000141456	PELP1	protein_coding	29	4	49	NA	NA	0
PRPF8	ENSG00000143537	ADAM15	protein_coding	29	4	40	-1014	-0.840	0
PRPF8	ENSG00000144791	LIMD1	protein_coding	29	4	45	NA	-0.372	0
PRPF8	ENSG00000145555	MYO10	protein_coding	29	2	44	NA	NA	0
PRPF8	ENSG00000147130	ZMYM3	protein_coding	29	4	52	-0.745	-0.764	0
PRPF8	ENSG00000147874	HAUS6	protein_coding	29	4	48	-1341	NA	0
PRPF8	ENSG00000148606	POLR3A	protein_coding	29	4	53	NA	NA	0
PRPF8	ENSG00000151208	DLG5	protein_coding	29	4	49	0.549	NA	0
PRPF8	ENSG00000151498	ACAD8	protein_coding	29	4	53	0.782	NA	0
PRPF8	ENSG00000154556	SORBS2	protein_coding	29	2	39	0.632	NA	0
PRPF8	ENSG00000155363	MOV10	protein_coding	29	4	57	0.442	NA	0
PRPF8	ENSG00000155506	LARP1	protein_coding	29	4	60	NA	NA	0
PRPF8	ENSG00000158941	CCAR2	protein_coding	29	4	50	NA	0.508	0
PRPF8	ENSG00000160007	ARHGAP35	protein_coding	29	4	43	NA	NA	0
PRPF8	ENSG00000160145	KALRN	protein_coding	29	4	42	NA	0.699	0
PRPF8	ENSG00000162065	TBC1D24	protein_coding	29	4	50	NA	NA	0
PRPF8	ENSG00000162231	NXF1	protein_coding	29	4	54	NA	0.881	0
PRPF8	ENSG00000162714	ZNF496	protein_coding	29	4	52	NA	-0.546	0
PRPF8	ENSG00000162923	WDR26	protein_coding	29	4	68	NA	NA	0
PRPF8	ENSG00000163013	FBXO41	protein_coding	29	4	49	-0.870	-1112	0
PRPF8	ENSG00000163110	PDLIM5	protein_coding	29	4	47	0.650	NA	0
PRPF8	ENSG00000163939	PBRM1	protein_coding	29	4	45	-0.620	NA	0
PRPF8	ENSG00000164164	OTUD4	protein_coding	29	4	45	0.276	NA	0
PRPF8	ENSG00000164924	YWHAZ	protein_coding	29	4	48	NA	0.258	0
PRPF8	ENSG00000166004	CEP295	protein_coding	29	4	49	NA	NA	0
PRPF8	ENSG00000166450	PRTG	protein_coding	29	2	36	-0.634	NA	0
PRPF8	ENSG00000167460	TPM4	protein_coding	29	4	51	NA	0.682	0
PRPF8	ENSG00000171735	CAMTA1	protein_coding	29	4	40	NA	NA	0
PRPF8	ENSG00000171914	TLN2	protein_coding	29	2	38	NA	NA	0
PRPF8	ENSG00000174485	DENND4A	protein_coding	29	4	38	NA	NA	0
PRPF8	ENSG00000175115	PACS1	protein_coding	29	4	43	0.732	-0.946	0
PRPF8	ENSG00000175387	SMAD2	protein_coding	29	4	48	NA	NA	0
PRPF8	ENSG00000176155	CCDC57	protein_coding	29	4	51	NA	-1583	0
PRPF8	ENSG00000177239	MAN1B1	protein_coding	29	4	45	NA	-0.287	0
PRPF8	ENSG00000177426	TGIF1	protein_coding	29	4	49	NA	NA	0
PRPF8	ENSG00000177663	IL17RA	protein_coding	29	4	43	NA	NA	0
PRPF8	ENSG00000182446	NPLOC4	protein_coding	29	4	50	NA	NA	0
PRPF8	ENSG00000182606	TRAK1	protein_coding	29	4	47	NA	-0.456	0
PRPF8	ENSG00000182871	COL18A1	protein_coding	29	4	45	NA	NA	0
PRPF8	ENSG00000183856	IQGAP3	protein_coding	29	4	34	-1784	-0.949	0
PRPF8	ENSG00000184432	COPB2	protein_coding	29	4	57	NA	NA	0
PRPF8	ENSG00000184634	MED12	protein_coding	29	4	41	-0.250	-0.839	0
PRPF8	ENSG00000185033	SEMA4B	protein_coding	29	4	46	NA	NA	0
PRPF8	ENSG00000185946	RNPC3	protein_coding	29	4	35	NA	NA	0
PRPF8	ENSG00000186260	MKL2	protein_coding	29	4	53	NA	-0.708	0
PRPF8	ENSG00000186716	BCR	protein_coding	29	4	55	NA	NA	0
PRPF8	ENSG00000186908	ZDHHC17	protein_coding	29	4	38	NA	NA	0
PRPF8	ENSG00000198752	CDC42BPB	protein_coding	29	3	41	NA	-0.460	0
PRPF8	ENSG00000204130	RUFY2	protein_coding	29	4	49	0.324	NA	0
PRPF8	ENSG00000204351	SKIV2L	protein_coding	29	4	45	-0.198	-0.459	0
PRPF8	ENSG00000243725	TTC4	protein_coding	29	4	52	NA	0.778	0
PRPF8	ENSG00000255439	AC135050.2	protein_coding	29	4	51	NA	NA	0
PRPF8	ENSG00000258388	PPT2-EGFL8	protein_coding	29	4	60	NA	-1104	0
PRPF8	ENSG00000270647	TAF15	protein_coding	29	4	57	-0.721	-0.654	0
PRPF8	ENSG00000271723	MROH7-TTC4	protein_coding	29	4	52	NA	NA	0
PRPF8	ENSG00000285253	AC090517.4	protein_coding	29	4	38	NA	NA	0
PRPF8	ENSG00000006025	OSBPL7	protein_coding	28	4	48	1034	0.870	0
PRPF8	ENSG00000036257	CUL3	protein_coding	28	4	47	NA	0.404	0
PRPF8	ENSG00000038532	CLEC16A	protein_coding	28	4	43	NA	-0.438	0
PRPF8	ENSG00000039123	MTREX	protein_coding	28	4	36	NA	NA	0
PRPF8	ENSG00000039523	RIPOR1	protein_coding	28	4	36	NA	-0.481	0
PRPF8	ENSG00000040933	INPP4A	protein_coding	28	4	46	0.888	-0.706	0
PRPF8	ENSG00000056097	ZFR	protein_coding	28	4	41	NA	0.290	0
PRPF8	ENSG00000060138	YBX3	protein_coding	28	4	50	NA	NA	0
PRPF8	ENSG00000060339	CCAR1	protein_coding	28	4	41	NA	NA	0
PRPF8	ENSG00000061676	NCKAP1	protein_coding	28	4	44	NA	NA	0
PRPF8	ENSG00000063046	EIF4B	protein_coding	28	4	49	-0.424	-0.118	0
PRPF8	ENSG00000065357	DGKA	protein_coding	28	4	40	NA	-1468	0
PRPF8	ENSG00000068024	HDAC4	protein_coding	28	4	44	NA	NA	0
PRPF8	ENSG00000074964	ARHGEF10L	protein_coding	28	2	43	NA	NA	0
PRPF8	ENSG00000077454	LRCH4	protein_coding	28	4	58	0.464	0.853	0
PRPF8	ENSG00000078269	SYNJ2	protein_coding	28	4	56	-0.218	-0.660	0
PRPF8	ENSG00000078618	NRDC	protein_coding	28	4	45	NA	-0.318	0
PRPF8	ENSG00000084112	SSH1	protein_coding	28	4	47	NA	NA	0
PRPF8	ENSG00000085185	BCORL1	protein_coding	28	4	42	NA	-0.311	0
PRPF8	ENSG00000085415	SEH1L	protein_coding	28	4	49	-0.350	NA	0
PRPF8	ENSG00000085982	USP40	protein_coding	28	4	44	NA	NA	0
PRPF8	ENSG00000087087	SRRT	protein_coding	28	4	42	-0.677	1183	0
PRPF8	ENSG00000087470	DNM1L	protein_coding	28	4	38	NA	-0.306	0
PRPF8	ENSG00000088247	KHSRP	protein_coding	28	4	52	NA	NA	0
PRPF8	ENSG00000089737	DDX24	protein_coding	28	4	45	0.191	0.197	0
PRPF8	ENSG00000091164	TXNL1	protein_coding	28	4	49	NA	0.949	0
PRPF8	ENSG00000092758	COL9A3	protein_coding	28	2	37	NA	NA	0
PRPF8	ENSG00000100296	THOC5	protein_coding	28	4	52	NA	-0.462	0
PRPF8	ENSG00000101782	RIOK3	protein_coding	28	4	40	0.667	0.390	0
PRPF8	ENSG00000104529	EEF1D	protein_coding	28	4	53	NA	0.395	0
PRPF8	ENSG00000105063	PPP6R1	protein_coding	28	4	53	NA	0.641	0
PRPF8	ENSG00000106009	BRAT1	protein_coding	28	4	54	NA	0.901	0
PRPF8	ENSG00000106012	IQCE	protein_coding	28	4	39	NA	NA	0
PRPF8	ENSG00000108256	NUFIP2	protein_coding	28	4	51	NA	NA	0
PRPF8	ENSG00000108443	RPS6KB1	protein_coding	28	4	51	NA	NA	0
PRPF8	ENSG00000108587	GOSR1	protein_coding	28	4	50	NA	1091	0
PRPF8	ENSG00000109971	HSPA8	protein_coding	28	4	74	-0.448	0.234	0
PRPF8	ENSG00000110066	KMT5B	protein_coding	28	4	47	0.348	NA	0
PRPF8	ENSG00000110697	PITPNM1	protein_coding	28	4	41	NA	NA	0
PRPF8	ENSG00000110713	NUP98	protein_coding	28	4	47	-0.516	NA	0
PRPF8	ENSG00000110756	HPS5	protein_coding	28	4	35	NA	NA	0
PRPF8	ENSG00000113360	DROSHA	protein_coding	28	4	42	-0.212	-0.218	0
PRPF8	ENSG00000113645	WWC1	protein_coding	28	2	36	0.744	NA	0
PRPF8	ENSG00000113719	ERGIC1	protein_coding	28	4	50	-0.154	-0.717	0
PRPF8	ENSG00000114126	TFDP2	protein_coding	28	4	46	-0.678	0.223	0
PRPF8	ENSG00000115486	GGCX	protein_coding	28	4	48	-0.374	NA	0
PRPF8	ENSG00000117155	SSX2IP	protein_coding	28	4	44	0.816	0.370	0
PRPF8	ENSG00000118515	SGK1	protein_coding	28	4	50	NA	2392	0
PRPF8	ENSG00000118965	WDR35	protein_coding	28	4	41	NA	-0.448	0
PRPF8	ENSG00000125124	BBS2	protein_coding	28	4	41	NA	-0.972	0
PRPF8	ENSG00000125695	AC046185.1	protein_coding	28	4	52	NA	NA	0
PRPF8	ENSG00000127586	CHTF18	protein_coding	28	4	58	-1595	NA	0
PRPF8	ENSG00000127831	VIL1	protein_coding	28	2	41	0.122	-2525	0
PRPF8	ENSG00000130254	SAFB2	protein_coding	28	4	52	NA	NA	0
PRPF8	ENSG00000130529	TRPM4	protein_coding	28	4	41	0.896	-0.972	0
PRPF8	ENSG00000130939	UBE4B	protein_coding	28	4	46	NA	-0.419	0
PRPF8	ENSG00000131899	LLGL1	protein_coding	28	4	43	NA	NA	0
PRPF8	ENSG00000132600	PRMT7	protein_coding	28	4	64	NA	NA	0
PRPF8	ENSG00000133056	PIK3C2B	protein_coding	28	2	36	NA	3875	0
PRPF8	ENSG00000134138	MEIS2	protein_coding	28	4	44	NA	NA	0
PRPF8	ENSG00000134569	LRP4	protein_coding	28	2	39	-1314	NA	0
PRPF8	ENSG00000137815	RTF1	protein_coding	28	4	42	-0.371	NA	0
PRPF8	ENSG00000138081	FBXO11	protein_coding	28	4	49	NA	0.247	0
PRPF8	ENSG00000138385	SSB	protein_coding	28	4	51	NA	0.265	0
PRPF8	ENSG00000138593	SECISBP2L	protein_coding	28	4	48	NA	NA	0
PRPF8	ENSG00000138668	HNRNPD	protein_coding	28	4	54	-0.797	NA	0
PRPF8	ENSG00000138767	CNOT6L	protein_coding	28	4	39	-0.385	NA	0
PRPF8	ENSG00000139641	ESYT1	protein_coding	28	4	42	NA	-0.918	0
PRPF8	ENSG00000140534	TICRR	protein_coding	28	4	44	-2114	-0.933	0
PRPF8	ENSG00000140577	CRTC3	protein_coding	28	4	42	NA	NA	0
PRPF8	ENSG00000140854	KATNB1	protein_coding	28	4	43	-0.699	NA	0
PRPF8	ENSG00000143799	PARP1	protein_coding	28	4	42	-0.433	-0.392	0
PRPF8	ENSG00000143933	CALM2	protein_coding	28	4	63	-0.225	0.258	0
PRPF8	ENSG00000144535	DIS3L2	protein_coding	28	4	45	NA	NA	0
PRPF8	ENSG00000145216	FIP1L1	protein_coding	28	4	50	NA	0.342	0
PRPF8	ENSG00000147140	NONO	protein_coding	28	4	57	-0.384	-0.203	0
PRPF8	ENSG00000147454	SLC25A37	protein_coding	28	4	49	0.656	-1220	0
PRPF8	ENSG00000148343	MIGA2	protein_coding	28	4	41	0.631	NA	0
PRPF8	ENSG00000151247	EIF4E	protein_coding	28	4	45	-0.453	0.289	0
PRPF8	ENSG00000152291	TGOLN2	protein_coding	28	4	45	-0.382	-0.213	0
PRPF8	ENSG00000152457	DCLRE1C	protein_coding	28	4	43	NA	NA	0
PRPF8	ENSG00000153922	CHD1	protein_coding	28	4	37	NA	0.325	0
PRPF8	ENSG00000154845	PPP4R1	protein_coding	28	4	48	NA	NA	0
PRPF8	ENSG00000155561	NUP205	protein_coding	28	4	38	-0.822	NA	0
PRPF8	ENSG00000156261	CCT8	protein_coding	28	4	40	-0.156	0.280	0
PRPF8	ENSG00000156304	SCAF4	protein_coding	28	4	41	NA	0.441	0
PRPF8	ENSG00000157637	SLC38A10	protein_coding	28	4	42	NA	NA	0
PRPF8	ENSG00000157873	TNFRSF14	protein_coding	28	4	38	0.930	NA	0
PRPF8	ENSG00000157954	WIPI2	protein_coding	28	4	53	NA	NA	0
PRPF8	ENSG00000158805	ZNF276	protein_coding	28	4	53	0.438	NA	0
PRPF8	ENSG00000160209	PDXK	protein_coding	28	4	49	-1108	NA	0
PRPF8	ENSG00000160867	FGFR4	protein_coding	28	4	53	NA	NA	0
PRPF8	ENSG00000160953	MUM1	protein_coding	28	4	56	NA	NA	0
PRPF8	ENSG00000164031	DNAJB14	protein_coding	28	4	42	0.382	NA	0
PRPF8	ENSG00000164402	2020-09-08	protein_coding	28	4	60	NA	-0.878	0
PRPF8	ENSG00000164466	SFXN1	protein_coding	28	4	50	-0.481	-0.731	0
PRPF8	ENSG00000164916	FOXK1	protein_coding	28	4	46	NA	NA	0
PRPF8	ENSG00000165238	WNK2	protein_coding	28	2	42	NA	NA	0
PRPF8	ENSG00000165458	INPPL1	protein_coding	28	4	48	0.583	NA	0
PRPF8	ENSG00000166888	STAT6	protein_coding	28	4	47	0.198	-0.958	0
PRPF8	ENSG00000167522	ANKRD11	protein_coding	28	4	49	0.226	0.261	0
PRPF8	ENSG00000167721	TSR1	protein_coding	28	4	51	-0.750	NA	0
PRPF8	ENSG00000168066	SF1	protein_coding	28	4	61	-0.291	0.350	0
PRPF8	ENSG00000168259	DNAJC7	protein_coding	28	4	59	NA	0.558	0
PRPF8	ENSG00000168502	MTCL1	protein_coding	28	4	32	NA	-1608	0
PRPF8	ENSG00000169432	SCN9A	protein_coding	28	4	43	0.965	NA	0
PRPF8	ENSG00000170145	SIK2	protein_coding	28	4	40	NA	NA	0
PRPF8	ENSG00000170322	NFRKB	protein_coding	28	4	49	NA	NA	0
PRPF8	ENSG00000171105	INSR	protein_coding	28	2	40	NA	NA	0
PRPF8	ENSG00000171862	PTEN	protein_coding	28	4	44	NA	NA	0
PRPF8	ENSG00000172932	ANKRD13D	protein_coding	28	4	54	0.425	0.480	0
PRPF8	ENSG00000175931	UBE2O	protein_coding	28	4	45	-0.805	NA	0
PRPF8	ENSG00000177479	ARIH2	protein_coding	28	4	56	-0.489	-0.432	0
PRPF8	ENSG00000177853	ZNF518A	protein_coding	28	4	44	0.480	NA	0
PRPF8	ENSG00000179134	SAMD4B	protein_coding	28	4	45	NA	NA	0
PRPF8	ENSG00000179889	PDXDC1	protein_coding	28	4	57	0.102	0.213	0
PRPF8	ENSG00000180822	PSMG4	protein_coding	28	4	37	NA	-0.788	0
PRPF8	ENSG00000184465	WDR27	protein_coding	28	4	59	-0.812	-1857	0
PRPF8	ENSG00000185189	NRBP2	protein_coding	28	4	49	NA	-1207	0
PRPF8	ENSG00000185787	MORF4L1	protein_coding	28	4	47	-0.263	0.480	0
PRPF8	ENSG00000185896	LAMP1	protein_coding	28	4	47	0.250	0.422	0
PRPF8	ENSG00000186298	PPP1CC	protein_coding	28	4	53	-0.436	NA	0
PRPF8	ENSG00000186575	NF2	protein_coding	28	4	38	NA	NA	0
PRPF8	ENSG00000187097	ENTPD5	protein_coding	28	4	52	NA	-1257	0
PRPF8	ENSG00000187605	TET3	protein_coding	28	4	45	NA	NA	0
PRPF8	ENSG00000197283	SYNGAP1	protein_coding	28	4	42	-0.864	-0.595	0
PRPF8	ENSG00000197323	TRIM33	protein_coding	28	4	48	NA	NA	0
PRPF8	ENSG00000198646	NCOA6	protein_coding	28	4	44	NA	NA	0
PRPF8	ENSG00000204084	INPP5B	protein_coding	28	4	47	NA	NA	0
PRPF8	ENSG00000213390	ARHGAP19	protein_coding	28	4	37	-1191	-0.526	0
PRPF8	ENSG00000214595	EML6	protein_coding	28	2	39	NA	NA	0
PRPF8	ENSG00000221968	FADS3	protein_coding	28	4	50	NA	-1527	0
PRPF8	ENSG00000257524	AL157935.2	protein_coding	28	4	38	NA	NA	0
PRPF8	ENSG00000269891	ARHGAP19-SLIT1	protein_coding	28	4	37	NA	NA	0
PRPF8	ENSG00000273269	AC073283.3	protein_coding	28	4	63	NA	NA	0
PRPF8	ENSG00000285441	SOD2	protein_coding	28	4	38	NA	NA	0
PRPF8	ENSG00000003400	CASP10	protein_coding	27	4	43	0.327	NA	0
PRPF8	ENSG00000007392	LUC7L	protein_coding	27	4	47	NA	-0.706	0
PRPF8	ENSG00000009335	UBE3C	protein_coding	27	4	50	NA	NA	0
PRPF8	ENSG00000010322	NISCH	protein_coding	27	4	45	NA	NA	0
PRPF8	ENSG00000011243	AKAP8L	protein_coding	27	4	52	0.782	0.534	0
PRPF8	ENSG00000012983	MAP4K5	protein_coding	27	4	45	NA	NA	0
PRPF8	ENSG00000013375	PGM3	protein_coding	27	4	44	-0.417	NA	0
PRPF8	ENSG00000023228	NDUFS1	protein_coding	27	4	34	-0.376	-0.319	0
PRPF8	ENSG00000032219	ARID4A	protein_coding	27	4	37	0.584	NA	0
PRPF8	ENSG00000040199	PHLPP2	protein_coding	27	4	41	0.864	NA	0
PRPF8	ENSG00000044115	CTNNA1	protein_coding	27	4	37	-0.465	-0.136	0
PRPF8	ENSG00000050426	LETMD1	protein_coding	27	4	43	-0.463	-1147	0
PRPF8	ENSG00000052749	RRP12	protein_coding	27	4	41	NA	0.741	0
PRPF8	ENSG00000057935	MTA3	protein_coding	27	4	33	NA	NA	0
PRPF8	ENSG00000058668	ATP2B4	protein_coding	27	4	50	NA	-0.882	0
PRPF8	ENSG00000059145	UNKL	protein_coding	27	4	41	-0.655	NA	0
PRPF8	ENSG00000070610	GBA2	protein_coding	27	4	52	NA	-0.538	0
PRPF8	ENSG00000070756	PABPC1	protein_coding	27	4	54	-0.223	-0.418	0
PRPF8	ENSG00000070961	ATP2B1	protein_coding	27	4	40	NA	NA	0
PRPF8	ENSG00000072134	EPN2	protein_coding	27	4	35	NA	NA	0
PRPF8	ENSG00000074603	DPP8	protein_coding	27	4	47	NA	NA	0
PRPF8	ENSG00000074800	ENO1	protein_coding	27	4	51	-2150	-0.291	0
PRPF8	ENSG00000075624	ACTB	protein_coding	27	4	61	NA	0.514	0
PRPF8	ENSG00000076944	STXBP2	protein_coding	27	4	54	0.450	NA	0
PRPF8	ENSG00000077458	FAM76B	protein_coding	27	4	45	NA	NA	0
PRPF8	ENSG00000082269	FAM135A	protein_coding	27	4	42	NA	-0.609	0
PRPF8	ENSG00000082805	ERC1	protein_coding	27	4	32	NA	NA	0
PRPF8	ENSG00000090539	CHRD	protein_coding	27	3	39	NA	NA	0
PRPF8	ENSG00000091136	LAMB1	protein_coding	27	4	49	-0.396	-0.986	0
PRPF8	ENSG00000092140	G2E3	protein_coding	27	4	48	-0.812	NA	0
PRPF8	ENSG00000096060	FKBP5	protein_coding	27	4	43	-0.816	-0.682	0
PRPF8	ENSG00000100241	SBF1	protein_coding	27	4	48	NA	NA	0
PRPF8	ENSG00000100297	MCM5	protein_coding	27	4	60	-1978	NA	0
PRPF8	ENSG00000100395	L3MBTL2	protein_coding	27	4	43	NA	NA	0
PRPF8	ENSG00000100650	SRSF5	protein_coding	27	4	52	-0.189	NA	0
PRPF8	ENSG00000101158	NELFCD	protein_coding	27	4	52	NA	NA	0
PRPF8	ENSG00000101384	JAG1	protein_coding	27	2	35	NA	NA	0
PRPF8	ENSG00000102606	ARHGEF7	protein_coding	27	4	51	NA	NA	0
PRPF8	ENSG00000103202	NME4	protein_coding	27	4	49	-1363	NA	0
PRPF8	ENSG00000103404	USP31	protein_coding	27	4	41	NA	0.352	0
PRPF8	ENSG00000103932	RPAP1	protein_coding	27	4	33	NA	NA	0
PRPF8	ENSG00000103978	TMEM87A	protein_coding	27	4	39	0.660	1563	0
PRPF8	ENSG00000104093	DMXL2	protein_coding	27	4	42	0.648	-0.675	0
PRPF8	ENSG00000104866	PPP1R37	protein_coding	27	4	52	NA	1361	0
PRPF8	ENSG00000105186	ANKRD27	protein_coding	27	4	52	NA	-0.630	0
PRPF8	ENSG00000105197	TIMM50	protein_coding	27	4	57	-0.561	NA	0
PRPF8	ENSG00000105426	PTPRS	protein_coding	27	4	40	NA	-1411	0
PRPF8	ENSG00000106346	USP42	protein_coding	27	4	38	NA	NA	0
PRPF8	ENSG00000107036	RIC1	protein_coding	27	4	39	0.352	-0.400	0
PRPF8	ENSG00000107862	GBF1	protein_coding	27	4	37	0.358	0.377	0
PRPF8	ENSG00000110422	HIPK3	protein_coding	27	4	36	0.310	0.554	0
PRPF8	ENSG00000110719	TCIRG1	protein_coding	27	4	43	NA	NA	0
PRPF8	ENSG00000110917	MLEC	protein_coding	27	4	39	-0.957	-0.294	0
PRPF8	ENSG00000111371	SLC38A1	protein_coding	27	4	44	-0.626	-0.396	0
PRPF8	ENSG00000111877	MCM9	protein_coding	27	4	44	NA	NA	0
PRPF8	ENSG00000112096	SOD2	protein_coding	27	4	37	0.476	-0.136	0
PRPF8	ENSG00000113407	TARS	protein_coding	27	4	42	NA	NA	0
PRPF8	ENSG00000113522	RAD50	protein_coding	27	4	34	0.509	-0.311	0
PRPF8	ENSG00000114120	SLC25A36	protein_coding	27	4	50	NA	-0.238	0
PRPF8	ENSG00000114423	CBLB	protein_coding	27	4	38	0.461	NA	0
PRPF8	ENSG00000114735	HEMK1	protein_coding	27	4	47	-0.751	-0.611	0
PRPF8	ENSG00000114786	ABHD14A-ACY1	protein_coding	27	4	49	NA	NA	0
PRPF8	ENSG00000115827	DCAF17	protein_coding	27	4	37	0.389	NA	0
PRPF8	ENSG00000116337	AMPD2	protein_coding	27	4	47	NA	0.387	0
PRPF8	ENSG00000116698	SMG7	protein_coding	27	4	44	NA	0.235	0
PRPF8	ENSG00000119403	PHF19	protein_coding	27	4	42	-1674	-0.442	0
PRPF8	ENSG00000120438	TCP1	protein_coding	27	4	52	-0.261	0.383	0
PRPF8	ENSG00000120685	PROSER1	protein_coding	27	4	38	NA	-0.375	0
PRPF8	ENSG00000120733	KDM3B	protein_coding	27	4	42	NA	-0.491	0
PRPF8	ENSG00000122359	ANXA11	protein_coding	27	4	47	NA	-0.273	0
PRPF8	ENSG00000124783	SSR1	protein_coding	27	4	51	-0.630	NA	0
PRPF8	ENSG00000124831	LRRFIP1	protein_coding	27	4	39	NA	-0.382	0
PRPF8	ENSG00000125089	SH3TC1	protein_coding	27	4	46	NA	NA	0
PRPF8	ENSG00000125149	C16orf70	protein_coding	27	4	46	NA	NA	0
PRPF8	ENSG00000125386	FAM193A	protein_coding	27	4	38	NA	NA	0
PRPF8	ENSG00000125633	CCDC93	protein_coding	27	4	42	NA	NA	0
PRPF8	ENSG00000125844	RRBP1	protein_coding	27	4	44	NA	0.525	0
PRPF8	ENSG00000127663	KDM4B	protein_coding	27	4	44	NA	-0.854	0
PRPF8	ENSG00000128191	DGCR8	protein_coding	27	4	49	-0.519	NA	0
PRPF8	ENSG00000129245	FXR2	protein_coding	27	4	39	NA	0.659	0
PRPF8	ENSG00000129534	MIS18BP1	protein_coding	27	4	33	-0.985	NA	0
PRPF8	ENSG00000130024	PHF10	protein_coding	27	4	43	NA	-0.380	0
PRPF8	ENSG00000134243	SORT1	protein_coding	27	4	48	NA	NA	0
PRPF8	ENSG00000134255	CEPT1	protein_coding	27	4	43	0.462	0.498	0
PRPF8	ENSG00000134644	PUM1	protein_coding	27	4	45	-0.318	-0.144	0
PRPF8	ENSG00000135316	SYNCRIP	protein_coding	27	4	49	-0.227	0.417	0
PRPF8	ENSG00000135720	DYNC1LI2	protein_coding	27	4	54	NA	0.537	0
PRPF8	ENSG00000137700	SLC37A4	protein_coding	27	4	46	-0.547	-1218	0
PRPF8	ENSG00000138709	LARP1B	protein_coding	27	4	40	NA	NA	0
PRPF8	ENSG00000139718	SETD1B	protein_coding	27	4	54	NA	0.752	0
PRPF8	ENSG00000140326	CDAN1	protein_coding	27	4	41	-0.514	NA	0
PRPF8	ENSG00000141526	SLC16A3	protein_coding	27	3	43	-2182	NA	0
PRPF8	ENSG00000144802	NFKBIZ	protein_coding	27	4	52	0.494	NA	0
PRPF8	ENSG00000144908	ALDH1L1	protein_coding	27	2	35	NA	NA	0
PRPF8	ENSG00000146457	WTAP	protein_coding	27	4	49	NA	0.682	0
PRPF8	ENSG00000146828	SLC12A9	protein_coding	27	4	45	0.903	NA	0
PRPF8	ENSG00000146872	TLK2	protein_coding	27	4	41	NA	NA	0
PRPF8	ENSG00000148019	CEP78	protein_coding	27	4	41	-1531	NA	0
PRPF8	ENSG00000148690	FRA10AC1	protein_coding	27	4	40	0.478	NA	0
PRPF8	ENSG00000149925	ALDOA	protein_coding	27	4	60	-1593	-1056	0
PRPF8	ENSG00000152332	UHMK1	protein_coding	27	4	39	1416	0.412	0
PRPF8	ENSG00000152492	CCDC50	protein_coding	27	4	44	NA	NA	0
PRPF8	ENSG00000157353	FUK	protein_coding	27	4	47	0.782	NA	0
PRPF8	ENSG00000159256	MORC3	protein_coding	27	4	43	NA	NA	0
PRPF8	ENSG00000160226	C21orf2	protein_coding	27	4	36	NA	NA	0
PRPF8	ENSG00000160271	RALGDS	protein_coding	27	4	42	NA	NA	0
PRPF8	ENSG00000160584	SIK3	protein_coding	27	4	50	NA	NA	0
PRPF8	ENSG00000160789	LMNA	protein_coding	27	4	64	0.759	NA	0
PRPF8	ENSG00000161960	EIF4A1	protein_coding	27	4	80	-0.561	0.384	0
PRPF8	ENSG00000162298	SYVN1	protein_coding	27	4	53	NA	0.424	0
PRPF8	ENSG00000163029	SMC6	protein_coding	27	4	42	-0.398	NA	0
PRPF8	ENSG00000163913	IFT122	protein_coding	27	4	40	NA	NA	0
PRPF8	ENSG00000164062	APEH	protein_coding	27	4	39	-0.502	-0.930	0
PRPF8	ENSG00000164134	NAA15	protein_coding	27	4	44	NA	0.564	0
PRPF8	ENSG00000165280	VCP	protein_coding	27	4	47	-0.334	-0.102	0
PRPF8	ENSG00000165282	PIGO	protein_coding	27	4	45	-0.808	-0.748	0
PRPF8	ENSG00000166508	MCM7	protein_coding	27	4	55	-2419	-0.620	0
PRPF8	ENSG00000167967	E4F1	protein_coding	27	4	43	1305	1061	0
PRPF8	ENSG00000168092	PAFAH1B2	protein_coding	27	4	40	NA	0.265	0
PRPF8	ENSG00000168439	STIP1	protein_coding	27	4	49	-0.592	0.369	0
PRPF8	ENSG00000168538	TRAPPC11	protein_coding	27	4	36	NA	NA	0
PRPF8	ENSG00000171608	PIK3CD	protein_coding	27	4	47	NA	-0.706	0
PRPF8	ENSG00000172732	MUS81	protein_coding	27	4	60	-0.609	NA	0
PRPF8	ENSG00000173517	PEAK1	protein_coding	27	4	35	NA	-1073	0
PRPF8	ENSG00000173889	PHC3	protein_coding	27	4	47	NA	NA	0
PRPF8	ENSG00000175309	PHYKPL	protein_coding	27	4	48	NA	-1517	0
PRPF8	ENSG00000176853	FAM91A1	protein_coding	27	4	40	0.423	0.679	0
PRPF8	ENSG00000182150	ERCC6L2	protein_coding	27	4	37	NA	NA	0
PRPF8	ENSG00000182199	SHMT2	protein_coding	27	4	49	-0.965	-0.335	0
PRPF8	ENSG00000182979	MTA1	protein_coding	27	4	44	-0.787	-0.511	0
PRPF8	ENSG00000183337	BCOR	protein_coding	27	4	49	-0.772	-0.171	0
PRPF8	ENSG00000184047	DIABLO	protein_coding	27	4	44	0.398	0.566	0
PRPF8	ENSG00000184371	CSF1	protein_coding	27	4	37	1033	1368	0
PRPF8	ENSG00000185163	DDX51	protein_coding	27	4	58	NA	0.886	0
PRPF8	ENSG00000185591	SP1	protein_coding	27	4	34	-0.565	-0.516	0
PRPF8	ENSG00000186532	SMYD4	protein_coding	27	4	35	NA	NA	0
PRPF8	ENSG00000188895	MSL1	protein_coding	27	4	53	-0.323	NA	0
PRPF8	ENSG00000188976	NOC2L	protein_coding	27	4	53	NA	NA	0
PRPF8	ENSG00000196305	IARS	protein_coding	27	4	46	NA	-0.294	0
PRPF8	ENSG00000196531	NACA	protein_coding	27	4	59	NA	0.184	0
PRPF8	ENSG00000198160	MIER1	protein_coding	27	4	37	NA	0.653	0
PRPF8	ENSG00000198373	WWP2	protein_coding	27	4	42	NA	0.337	0
PRPF8	ENSG00000198604	BAZ1A	protein_coding	27	4	33	0.395	0.354	0
PRPF8	ENSG00000198753	PLXNB3	protein_coding	27	3	41	1413	NA	0
PRPF8	ENSG00000204304	PBX2	protein_coding	27	4	52	-0.510	-0.327	0
PRPF8	ENSG00000204410	MSH5	protein_coding	27	4	48	-1526	-2015	0
PRPF8	ENSG00000204463	BAG6	protein_coding	27	4	49	NA	NA	0
PRPF8	ENSG00000205339	IPO7	protein_coding	27	4	44	NA	NA	0
PRPF8	ENSG00000211456	SACM1L	protein_coding	27	4	44	0.304	0.284	0
PRPF8	ENSG00000214753	HNRNPUL2	protein_coding	27	4	46	-0.289	-0.221	0
PRPF8	ENSG00000249141	AL159163.1	protein_coding	27	4	54	NA	NA	0
PRPF8	ENSG00000257923	CUX1	protein_coding	27	4	43	NA	-0.398	0
PRPF8	ENSG00000258529	AP001781.2	protein_coding	27	4	46	NA	NA	0
PRPF8	ENSG00000259132	AL132780.3	protein_coding	27	4	48	NA	-1288	0
PRPF8	ENSG00000259529	AL136295.5	protein_coding	27	4	43	0.980	NA	0
PRPF8	ENSG00000262304	AC027796.3	protein_coding	27	4	44	NA	NA	0
PRPF8	ENSG00000268434	AC011530.1	protein_coding	27	4	42	NA	NA	0
PRPF8	ENSG00000282278	AC058822.1	protein_coding	27	4	49	NA	NA	0
PRPF8	ENSG00000283088	AC010487.3	protein_coding	27	4	39	NA	NA	0
PRPF8	ENSG00000283782	AC116366.3	protein_coding	27	4	34	NA	NA	0
PRPF8	ENSG00000284934	DIABLO	protein_coding	27	4	44	NA	NA	0
PRPF8	ENSG00000285043	ALDOA	protein_coding	27	4	60	NA	NA	0
PRPF8	ENSG00000001084	GCLC	protein_coding	26	4	44	NA	0.585	0
PRPF8	ENSG00000008869	HEATR5B	protein_coding	26	4	37	0.603	NA	0
PRPF8	ENSG00000008952	SEC62	protein_coding	26	4	44	NA	0.292	0
PRPF8	ENSG00000009954	BAZ1B	protein_coding	26	4	38	-0.994	NA	0
PRPF8	ENSG00000012822	CALCOCO1	protein_coding	26	4	48	NA	NA	0
PRPF8	ENSG00000013288	MAN2B2	protein_coding	26	4	36	NA	NA	0
PRPF8	ENSG00000035681	NSMAF	protein_coding	26	4	43	NA	NA	0
PRPF8	ENSG00000037637	FBXO42	protein_coding	26	4	45	NA	NA	0
PRPF8	ENSG00000042286	AIFM2	protein_coding	26	4	45	0.577	NA	0
PRPF8	ENSG00000044574	HSPA5	protein_coding	26	4	49	-1118	0.159	0
PRPF8	ENSG00000047315	POLR2B	protein_coding	26	4	32	NA	0.397	0
PRPF8	ENSG00000052795	FNIP2	protein_coding	26	4	36	-0.640	0.262	0
PRPF8	ENSG00000060749	QSER1	protein_coding	26	4	40	NA	NA	0
PRPF8	ENSG00000060971	ACAA1	protein_coding	26	4	57	NA	NA	0
PRPF8	ENSG00000069702	TGFBR3	protein_coding	26	4	44	-0.990	NA	0
PRPF8	ENSG00000069869	NEDD4	protein_coding	26	4	32	0.805	NA	0
PRPF8	ENSG00000071462	BUD23	protein_coding	26	4	58	NA	0.371	0
PRPF8	ENSG00000071894	CPSF1	protein_coding	26	4	43	NA	NA	0
PRPF8	ENSG00000073536	NLE1	protein_coding	26	4	47	-0.747	NA	0
PRPF8	ENSG00000073910	FRY	protein_coding	26	2	39	NA	NA	0
PRPF8	ENSG00000075856	SART3	protein_coding	26	4	50	NA	0.224	0
PRPF8	ENSG00000076201	PTPN23	protein_coding	26	4	44	NA	NA	0
PRPF8	ENSG00000076685	NT5C2	protein_coding	26	4	44	0.760	0.568	0
PRPF8	ENSG00000079819	EPB41L2	protein_coding	26	4	35	-0.695	-0.590	0
PRPF8	ENSG00000082781	ITGB5	protein_coding	26	4	37	-0.388	NA	0
PRPF8	ENSG00000083223	ZCCHC6	protein_coding	26	4	34	0.671	NA	0
PRPF8	ENSG00000085998	POMGNT1	protein_coding	26	4	48	-0.985	NA	0
PRPF8	ENSG00000086200	IPO11	protein_coding	26	4	42	-0.655	NA	0
PRPF8	ENSG00000088038	CNOT3	protein_coding	26	4	45	NA	0.462	0
PRPF8	ENSG00000088367	EPB41L1	protein_coding	26	3	36	0.428	NA	0
PRPF8	ENSG00000089006	SNX5	protein_coding	26	4	47	-0.438	NA	0
PRPF8	ENSG00000090447	TFAP4	protein_coding	26	4	40	-1231	NA	0
PRPF8	ENSG00000090520	DNAJB11	protein_coding	26	4	48	NA	0.847	0
PRPF8	ENSG00000094916	CBX5	protein_coding	26	4	38	NA	NA	0
PRPF8	ENSG00000099381	SETD1A	protein_coding	26	4	48	NA	0.723	0
PRPF8	ENSG00000100084	HIRA	protein_coding	26	4	43	-0.373	0.436	0
PRPF8	ENSG00000100242	SUN2	protein_coding	26	4	43	NA	NA	0
PRPF8	ENSG00000100416	TRMU	protein_coding	26	4	52	NA	0.663	0
PRPF8	ENSG00000100462	PRMT5	protein_coding	26	4	35	-0.336	NA	0
PRPF8	ENSG00000100836	PABPN1	protein_coding	26	4	61	-0.427	NA	0
PRPF8	ENSG00000102531	FNDC3A	protein_coding	26	4	34	0.479	0.715	0
PRPF8	ENSG00000103512	NOMO1	protein_coding	26	4	45	-0.417	NA	0
PRPF8	ENSG00000108509	CAMTA2	protein_coding	26	4	35	NA	-0.480	0
PRPF8	ENSG00000109861	CTSC	protein_coding	26	4	44	-0.371	NA	0
PRPF8	ENSG00000111640	GAPDH	protein_coding	26	4	51	-1117	-0.321	0
PRPF8	ENSG00000111696	NT5DC3	protein_coding	26	4	43	NA	NA	0
PRPF8	ENSG00000112787	FBRSL1	protein_coding	26	4	44	NA	NA	0
PRPF8	ENSG00000113319	RASGRF2	protein_coding	26	2	38	0.418	NA	0
PRPF8	ENSG00000113658	SMAD5	protein_coding	26	4	40	-0.285	NA	0
PRPF8	ENSG00000114374	USP9Y	protein_coding	26	2	33	NA	NA	0
PRPF8	ENSG00000115942	ORC2	protein_coding	26	4	38	-0.289	-0.243	0
PRPF8	ENSG00000116138	DNAJC16	protein_coding	26	4	42	NA	NA	0
PRPF8	ENSG00000120137	PANK3	protein_coding	26	4	40	NA	-0.735	0
PRPF8	ENSG00000120708	TGFBI	protein_coding	26	2	36	-1609	NA	0
PRPF8	ENSG00000123124	WWP1	protein_coding	26	4	34	-0.354	NA	0
PRPF8	ENSG00000123473	STIL	protein_coding	26	4	43	-1606	NA	0
PRPF8	ENSG00000123836	PFKFB2	protein_coding	26	4	41	NA	-1048	0
PRPF8	ENSG00000124164	VAPB	protein_coding	26	4	36	-0.264	NA	0
PRPF8	ENSG00000128578	STRIP2	protein_coding	26	4	44	-0.914	-0.605	0
PRPF8	ENSG00000130830	MPP1	protein_coding	26	4	46	1463	-0.829	0
PRPF8	ENSG00000132716	DCAF8	protein_coding	26	4	43	NA	-0.434	0
PRPF8	ENSG00000132849	PATJ	protein_coding	26	2	32	0.389	NA	0
PRPF8	ENSG00000134109	EDEM1	protein_coding	26	4	44	NA	-0.216	0
PRPF8	ENSG00000134698	2020-08-04	protein_coding	26	4	36	-0.436	-0.855	0
PRPF8	ENSG00000134755	DSC2	protein_coding	26	4	33	0.592	NA	0
PRPF8	ENSG00000134905	CARS2	protein_coding	26	4	48	NA	NA	0
PRPF8	ENSG00000135018	UBQLN1	protein_coding	26	4	40	NA	NA	0
PRPF8	ENSG00000135473	PAN2	protein_coding	26	4	54	-0.651	-1268	0
PRPF8	ENSG00000135506	OS9	protein_coding	26	4	48	0.256	0.177	0
PRPF8	ENSG00000136100	VPS36	protein_coding	26	4	41	NA	NA	0
PRPF8	ENSG00000136758	YME1L1	protein_coding	26	4	37	0.246	0.571	0
PRPF8	ENSG00000137145	DENND4C	protein_coding	26	4	41	NA	-0.544	0
PRPF8	ENSG00000137491	SLCO2B1	protein_coding	26	4	39	0.983	NA	0
PRPF8	ENSG00000137807	KIF23	protein_coding	26	4	40	-1498	NA	0
PRPF8	ENSG00000138162	TACC2	protein_coding	26	2	42	NA	NA	0
PRPF8	ENSG00000139182	CLSTN3	protein_coding	26	4	40	0.711	-0.451	0
PRPF8	ENSG00000139990	DCAF5	protein_coding	26	4	44	0.318	NA	0
PRPF8	ENSG00000140521	POLG	protein_coding	26	4	40	NA	NA	0
PRPF8	ENSG00000140525	FANCI	protein_coding	26	4	43	-1624	-0.770	0
PRPF8	ENSG00000140995	DEF8	protein_coding	26	4	47	0.497	0.453	0
PRPF8	ENSG00000143418	CERS2	protein_coding	26	4	54	0.287	NA	0
PRPF8	ENSG00000144567	RETREG2	protein_coding	26	4	40	NA	NA	0
PRPF8	ENSG00000145041	DCAF1	protein_coding	26	4	38	-0.419	0.282	0
PRPF8	ENSG00000145348	TBCK	protein_coding	26	4	39	NA	-0.475	0
PRPF8	ENSG00000145495	MARCH6	protein_coding	26	4	45	-0.251	-0.668	0
PRPF8	ENSG00000146223	RPL7L1	protein_coding	26	4	56	-0.276	NA	0
PRPF8	ENSG00000146918	NCAPG2	protein_coding	26	4	51	-1334	-0.464	0
PRPF8	ENSG00000147044	CASK	protein_coding	26	4	34	0.488	NA	0
PRPF8	ENSG00000147274	RBMX	protein_coding	26	4	58	-0.632	NA	0
PRPF8	ENSG00000148341	SH3GLB2	protein_coding	26	4	48	NA	-1224	0
PRPF8	ENSG00000151718	WWC2	protein_coding	26	4	35	-0.563	-0.498	0
PRPF8	ENSG00000152795	HNRNPDL	protein_coding	26	4	56	-0.685	NA	0
PRPF8	ENSG00000156787	TBC1D31	protein_coding	26	4	34	NA	-0.621	0
PRPF8	ENSG00000160959	LRRC14	protein_coding	26	4	34	NA	0.843	0
PRPF8	ENSG00000161010	MRNIP	protein_coding	26	4	47	NA	NA	0
PRPF8	ENSG00000161011	SQSTM1	protein_coding	26	4	60	0.431	0.913	0
PRPF8	ENSG00000163516	ANKZF1	protein_coding	26	4	45	-1052	-1468	0
PRPF8	ENSG00000163798	SLC4A1AP	protein_coding	26	4	34	0.233	0.881	0
PRPF8	ENSG00000164292	RHOBTB3	protein_coding	26	4	46	NA	-0.606	0
PRPF8	ENSG00000165792	METTL17	protein_coding	26	4	49	NA	NA	0
PRPF8	ENSG00000165802	NSMF	protein_coding	26	4	47	-1171	NA	0
PRPF8	ENSG00000167004	PDIA3	protein_coding	26	4	45	-0.440	0.310	0
PRPF8	ENSG00000167123	CERCAM	protein_coding	26	4	42	NA	-1433	0
PRPF8	ENSG00000167244	IGF2	protein_coding	26	2	40	-1261	NA	0
PRPF8	ENSG00000167930	FAM234A	protein_coding	26	4	37	NA	NA	0
PRPF8	ENSG00000168096	ANKS3	protein_coding	26	4	51	NA	NA	0
PRPF8	ENSG00000168397	ATG4B	protein_coding	26	4	45	NA	NA	0
PRPF8	ENSG00000168615	ADAM9	protein_coding	26	4	38	-0.765	NA	0
PRPF8	ENSG00000168924	LETM1	protein_coding	26	4	48	0.409	0.521	0
PRPF8	ENSG00000172053	QARS	protein_coding	26	4	46	-0.542	-0.931	0
PRPF8	ENSG00000174227	PIGG	protein_coding	26	4	49	0.761	NA	0
PRPF8	ENSG00000174483	BBS1	protein_coding	26	4	38	-0.888	-1127	0
PRPF8	ENSG00000175216	CKAP5	protein_coding	26	4	48	-0.625	-0.444	0
PRPF8	ENSG00000175792	RUVBL1	protein_coding	26	4	43	NA	-0.444	0
PRPF8	ENSG00000177685	CRACR2B	protein_coding	26	4	42	0.478	NA	0
PRPF8	ENSG00000178927	C17orf62	protein_coding	26	4	52	0.546	NA	0
PRPF8	ENSG00000182718	ANXA2	protein_coding	26	4	49	NA	0.217	0
PRPF8	ENSG00000184575	XPOT	protein_coding	26	4	53	-0.465	-0.428	0
PRPF8	ENSG00000185800	DMWD	protein_coding	26	4	40	NA	NA	0
PRPF8	ENSG00000187134	AKR1C1	protein_coding	26	4	48	0.349	NA	0
PRPF8	ENSG00000187244	BCAM	protein_coding	26	3	38	NA	-1960	0
PRPF8	ENSG00000188352	FOCAD	protein_coding	26	4	31	-1208	NA	0
PRPF8	ENSG00000188994	ZNF292	protein_coding	26	4	39	-0.540	-0.625	0
PRPF8	ENSG00000196586	MYO6	protein_coding	26	4	36	1024	NA	0
PRPF8	ENSG00000197324	LRP10	protein_coding	26	4	39	0.773	NA	0
PRPF8	ENSG00000198431	TXNRD1	protein_coding	26	4	42	NA	NA	0
PRPF8	ENSG00000198911	SREBF2	protein_coding	26	4	48	NA	-0.774	0
PRPF8	ENSG00000204574	ABCF1	protein_coding	26	4	49	NA	0.724	0
PRPF8	ENSG00000205937	RNPS1	protein_coding	26	4	52	-0.395	0.414	0
PRPF8	ENSG00000213341	CHUK	protein_coding	26	4	38	NA	0.480	0
PRPF8	ENSG00000215472	RPL17-C18orf32	protein_coding	26	4	50	1575	1157	0
PRPF8	ENSG00000231925	TAPBP	protein_coding	26	4	51	0.488	-0.738	0
PRPF8	ENSG00000241945	PWP2	protein_coding	26	4	47	-0.746	NA	0
PRPF8	ENSG00000247596	TWF2	protein_coding	26	4	45	NA	NA	0
PRPF8	ENSG00000256349	AP002748.4	protein_coding	26	4	38	NA	NA	0
PRPF8	ENSG00000258728	AL162231.3	protein_coding	26	4	46	NA	NA	0
PRPF8	ENSG00000261732	AL031708.1	protein_coding	26	4	57	NA	NA	0
PRPF8	ENSG00000273154	AL121845.3	protein_coding	26	4	42	1138	1098	0
PRPF8	ENSG00000274588	DGKK	protein_coding	26	2	33	-0.197	NA	0
PRPF8	ENSG00000275464	FP565260.1	protein_coding	26	4	47	NA	NA	0
PRPF8	ENSG00000284779	IGF2	protein_coding	26	2	40	NA	NA	0
PRPF8	ENSG00000004534	RBM6	protein_coding	25	4	41	NA	-0.331	0
PRPF8	ENSG00000004975	DVL2	protein_coding	25	4	49	-1101	-1088	0
PRPF8	ENSG00000005471	ABCB4	protein_coding	25	2	34	NA	NA	0
PRPF8	ENSG00000006194	ZNF263	protein_coding	25	4	39	NA	1347	0
PRPF8	ENSG00000006652	IFRD1	protein_coding	25	4	47	NA	NA	0
PRPF8	ENSG00000009950	MLXIPL	protein_coding	25	4	46	NA	-1427	0
PRPF8	ENSG00000011052	NME1-NME2	protein_coding	25	4	56	NA	NA	0
PRPF8	ENSG00000012048	BRCA1	protein_coding	25	4	39	-1855	-0.537	0
PRPF8	ENSG00000013441	CLK1	protein_coding	25	4	48	0.407	NA	0
PRPF8	ENSG00000017260	ATP2C1	protein_coding	25	4	41	NA	NA	0
PRPF8	ENSG00000018189	RUFY3	protein_coding	25	4	37	NA	-0.482	0
PRPF8	ENSG00000025434	NR1H3	protein_coding	25	4	38	-0.520	NA	0
PRPF8	ENSG00000035928	RFC1	protein_coding	25	4	38	-0.537	NA	0
PRPF8	ENSG00000043093	DCUN1D1	protein_coding	25	4	34	NA	0.299	0
PRPF8	ENSG00000049618	ARID1B	protein_coding	25	4	44	-0.404	-0.322	0
PRPF8	ENSG00000060656	PTPRU	protein_coding	25	4	37	NA	NA	0
PRPF8	ENSG00000062485	CS	protein_coding	25	4	51	-0.405	-0.225	0
PRPF8	ENSG00000062725	APPBP2	protein_coding	25	4	32	NA	NA	0
PRPF8	ENSG00000065613	SLK	protein_coding	25	4	37	NA	-0.197	0
PRPF8	ENSG00000067191	CACNB1	protein_coding	25	4	33	NA	NA	0
PRPF8	ENSG00000069020	MAST4	protein_coding	25	4	46	1691	0.779	0
PRPF8	ENSG00000070010	UFD1	protein_coding	25	4	58	-0.354	NA	0
PRPF8	ENSG00000070367	EXOC5	protein_coding	25	4	36	NA	NA	0
PRPF8	ENSG00000076382	SPAG5	protein_coding	25	4	41	-2028	NA	0
PRPF8	ENSG00000076513	ANKRD13A	protein_coding	25	4	40	NA	NA	0
PRPF8	ENSG00000085872	CHERP	protein_coding	25	4	37	NA	0.998	0
PRPF8	ENSG00000086848	ALG9	protein_coding	25	4	42	NA	0.294	0
PRPF8	ENSG00000090316	MAEA	protein_coding	25	4	46	NA	0.811	0
PRPF8	ENSG00000092108	SCFD1	protein_coding	25	4	42	0.414	NA	0
PRPF8	ENSG00000092199	HNRNPC	protein_coding	25	4	42	-0.569	NA	0
PRPF8	ENSG00000095539	SEMA4G	protein_coding	25	4	34	-0.345	-2102	0
PRPF8	ENSG00000099219	ERMP1	protein_coding	25	4	35	-1120	-0.630	0
PRPF8	ENSG00000099783	HNRNPM	protein_coding	25	4	42	-0.627	0.244	0
PRPF8	ENSG00000100030	MAPK1	protein_coding	25	4	50	-0.347	NA	0
PRPF8	ENSG00000100335	MIEF1	protein_coding	25	4	47	-0.348	NA	0
PRPF8	ENSG00000100614	PPM1A	protein_coding	25	4	34	NA	NA	0
PRPF8	ENSG00000101104	PABPC1L	protein_coding	25	4	49	NA	-1515	0
PRPF8	ENSG00000103091	WDR59	protein_coding	25	4	52	-0.573	-0.979	0
PRPF8	ENSG00000103199	ZNF500	protein_coding	25	4	38	NA	NA	0
PRPF8	ENSG00000103423	DNAJA3	protein_coding	25	4	49	-0.424	NA	0
PRPF8	ENSG00000103995	CEP152	protein_coding	25	4	43	-1376	-1214	0
PRPF8	ENSG00000104613	INTS10	protein_coding	25	4	41	-0.244	NA	0
PRPF8	ENSG00000104859	CLASRP	protein_coding	25	4	44	NA	1059	0
PRPF8	ENSG00000104973	MED25	protein_coding	25	4	42	NA	NA	0
PRPF8	ENSG00000106771	TMEM245	protein_coding	25	4	48	0.280	NA	0
PRPF8	ENSG00000107077	KDM4C	protein_coding	25	4	34	-0.387	-0.650	0
PRPF8	ENSG00000107651	SEC23IP	protein_coding	25	4	33	NA	0.480	0
PRPF8	ENSG00000107951	MTPAP	protein_coding	25	4	41	NA	NA	0
PRPF8	ENSG00000108506	INTS2	protein_coding	25	4	34	-0.713	NA	0
PRPF8	ENSG00000108591	DRG2	protein_coding	25	4	53	NA	NA	0
PRPF8	ENSG00000108825	PTGES3L-AARSD1	protein_coding	25	4	46	NA	NA	0
PRPF8	ENSG00000109572	CLCN3	protein_coding	25	4	41	NA	NA	0
PRPF8	ENSG00000110075	PPP6R3	protein_coding	25	4	45	NA	0.184	0
PRPF8	ENSG00000110237	ARHGEF17	protein_coding	25	3	36	0.750	NA	0
PRPF8	ENSG00000110344	UBE4A	protein_coding	25	4	37	0.570	0.381	0
PRPF8	ENSG00000111581	NUP107	protein_coding	25	4	29	-0.883	NA	0
PRPF8	ENSG00000111641	NOP2	protein_coding	25	4	57	-0.342	0.513	0
PRPF8	ENSG00000112249	ASCC3	protein_coding	25	4	35	0.668	NA	0
PRPF8	ENSG00000113851	CRBN	protein_coding	25	4	41	NA	NA	0
PRPF8	ENSG00000114859	CLCN2	protein_coding	25	4	34	NA	NA	0
PRPF8	ENSG00000115109	EPB41L5	protein_coding	25	4	35	0.362	NA	0
PRPF8	ENSG00000115839	RAB3GAP1	protein_coding	25	4	41	0.516	0.316	0
PRPF8	ENSG00000115993	TRAK2	protein_coding	25	4	36	NA	NA	0
PRPF8	ENSG00000116001	TIA1	protein_coding	25	4	53	NA	-0.497	0
PRPF8	ENSG00000116016	EPAS1	protein_coding	25	4	39	NA	2731	0
PRPF8	ENSG00000116171	SCP2	protein_coding	25	4	31	0.808	0.284	0
PRPF8	ENSG00000116260	QSOX1	protein_coding	25	4	38	NA	NA	0
PRPF8	ENSG00000116266	STXBP3	protein_coding	25	4	35	0.707	NA	0
PRPF8	ENSG00000117528	ABCD3	protein_coding	25	4	39	0.428	NA	0
PRPF8	ENSG00000118046	STK11	protein_coding	25	4	52	NA	NA	0
PRPF8	ENSG00000119139	TJP2	protein_coding	25	4	40	-0.292	0.627	0
PRPF8	ENSG00000119720	NRDE2	protein_coding	25	4	33	NA	NA	0
PRPF8	ENSG00000121022	COPS5	protein_coding	25	4	44	NA	0.588	0
PRPF8	ENSG00000121281	ADCY7	protein_coding	25	4	38	NA	-0.549	0
PRPF8	ENSG00000122126	OCRL	protein_coding	25	4	40	NA	NA	0
PRPF8	ENSG00000122218	COPA	protein_coding	25	4	37	NA	-0.395	0
PRPF8	ENSG00000124275	MTRR	protein_coding	25	4	45	NA	0.307	0
PRPF8	ENSG00000126214	KLC1	protein_coding	25	4	36	NA	NA	0
PRPF8	ENSG00000127526	SLC35E1	protein_coding	25	4	38	NA	NA	0
PRPF8	ENSG00000128585	MKLN1	protein_coding	25	4	42	NA	NA	0
PRPF8	ENSG00000129128	SPCS3	protein_coding	25	4	42	NA	NA	0
PRPF8	ENSG00000129968	ABHD17A	protein_coding	25	4	53	NA	1391	0
PRPF8	ENSG00000130270	ATP8B3	protein_coding	25	4	42	-0.987	-2003	0
PRPF8	ENSG00000130813	C19orf66	protein_coding	25	4	46	NA	-0.738	0
PRPF8	ENSG00000130856	ZNF236	protein_coding	25	4	39	NA	NA	0
PRPF8	ENSG00000132676	DAP3	protein_coding	25	4	45	-0.338	-0.342	0
PRPF8	ENSG00000133704	IPO8	protein_coding	25	4	36	NA	NA	0
PRPF8	ENSG00000134186	PRPF38B	protein_coding	25	4	50	NA	0.292	0
PRPF8	ENSG00000134452	FBXO18	protein_coding	25	4	44	NA	-0.249	0
PRPF8	ENSG00000134453	RBM17	protein_coding	25	4	45	-0.599	NA	0
PRPF8	ENSG00000134697	GNL2	protein_coding	25	4	38	NA	0.427	0
PRPF8	ENSG00000135124	P2RX4	protein_coding	25	4	44	NA	NA	0
PRPF8	ENSG00000135454	B4GALNT1	protein_coding	25	4	43	NA	NA	0
PRPF8	ENSG00000135597	REPS1	protein_coding	25	4	47	0.305	0.925	0
PRPF8	ENSG00000135924	DNAJB2	protein_coding	25	4	35	0.502	0.894	0
PRPF8	ENSG00000136153	LMO7	protein_coding	25	3	39	0.434	NA	0
PRPF8	ENSG00000137106	GRHPR	protein_coding	25	4	53	NA	-0.527	0
PRPF8	ENSG00000137166	FOXP4	protein_coding	25	4	48	NA	NA	0
PRPF8	ENSG00000138074	SLC5A6	protein_coding	25	4	47	-0.787	NA	0
PRPF8	ENSG00000138835	RGS3	protein_coding	25	2	39	1067	NA	0
PRPF8	ENSG00000140396	NCOA2	protein_coding	25	4	37	0.266	NA	0
PRPF8	ENSG00000140464	PML	protein_coding	25	4	40	0.637	0.364	0
PRPF8	ENSG00000140479	PCSK6	protein_coding	25	4	41	NA	-1048	0
PRPF8	ENSG00000141076	UTP4	protein_coding	25	4	40	NA	0.367	0
PRPF8	ENSG00000141298	SSH2	protein_coding	25	4	36	0.888	0.818	0
PRPF8	ENSG00000141568	FOXK2	protein_coding	25	4	47	NA	NA	0
PRPF8	ENSG00000142178	SIK1	protein_coding	25	4	46	NA	NA	0
PRPF8	ENSG00000143093	STRIP1	protein_coding	25	4	46	NA	-0.261	0
PRPF8	ENSG00000143870	PDIA6	protein_coding	25	4	40	-0.998	NA	0
PRPF8	ENSG00000144040	SFXN5	protein_coding	25	4	41	0.532	NA	0
PRPF8	ENSG00000144136	SLC20A1	protein_coding	25	4	51	-0.312	-0.361	0
PRPF8	ENSG00000144395	CCDC150	protein_coding	25	4	30	NA	NA	0
PRPF8	ENSG00000145725	PPIP5K2	protein_coding	25	4	40	NA	-0.477	0
PRPF8	ENSG00000145916	RMND5B	protein_coding	25	4	53	NA	-0.549	0
PRPF8	ENSG00000146909	NOM1	protein_coding	25	4	50	NA	NA	0
PRPF8	ENSG00000147789	ZNF7	protein_coding	25	4	41	0.568	NA	0
PRPF8	ENSG00000148358	GPR107	protein_coding	25	4	47	NA	0.325	0
PRPF8	ENSG00000148840	PPRC1	protein_coding	25	4	45	-0.471	NA	0
PRPF8	ENSG00000149016	TUT1	protein_coding	25	4	29	NA	NA	0
PRPF8	ENSG00000149100	EIF3M	protein_coding	25	4	50	0.264	0.241	0
PRPF8	ENSG00000150990	DHX37	protein_coding	25	4	37	NA	0.772	0
PRPF8	ENSG00000153339	TRAPPC8	protein_coding	25	4	35	NA	0.352	0
PRPF8	ENSG00000153933	DGKE	protein_coding	25	4	41	NA	-0.500	0
PRPF8	ENSG00000155229	MMS19	protein_coding	25	4	47	-0.382	-0.615	0
PRPF8	ENSG00000155744	FAM126B	protein_coding	25	4	36	0.666	NA	0
PRPF8	ENSG00000156675	RAB11FIP1	protein_coding	25	4	32	NA	-0.320	0
PRPF8	ENSG00000157796	WDR19	protein_coding	25	4	33	NA	-0.720	0
PRPF8	ENSG00000158286	RNF207	protein_coding	25	4	48	NA	-1252	0
PRPF8	ENSG00000158711	ELK4	protein_coding	25	4	40	NA	NA	0
PRPF8	ENSG00000159086	PAXBP1	protein_coding	25	4	41	NA	NA	0
PRPF8	ENSG00000159592	GPBP1L1	protein_coding	25	4	49	NA	NA	0
PRPF8	ENSG00000159788	RGS12	protein_coding	25	3	35	NA	NA	0
PRPF8	ENSG00000161036	LRWD1	protein_coding	25	4	45	NA	0.643	0
PRPF8	ENSG00000161847	RAVER1	protein_coding	25	4	46	NA	0.919	0
PRPF8	ENSG00000162063	CCNF	protein_coding	25	4	43	-1755	NA	0
PRPF8	ENSG00000163349	HIPK1	protein_coding	25	4	54	0.392	0.326	0
PRPF8	ENSG00000164163	ABCE1	protein_coding	25	4	39	-0.499	NA	0
PRPF8	ENSG00000164199	ADGRV1	protein_coding	25	2	35	1290	-1174	0
PRPF8	ENSG00000164244	PRRC1	protein_coding	25	4	44	NA	-0.368	0
PRPF8	ENSG00000166037	CEP57	protein_coding	25	4	36	-0.449	-0.537	0
PRPF8	ENSG00000166123	GPT2	protein_coding	25	4	44	NA	-1294	0
PRPF8	ENSG00000166479	TMX3	protein_coding	25	4	39	0.826	NA	0
PRPF8	ENSG00000166689	PLEKHA7	protein_coding	25	4	38	NA	NA	0
PRPF8	ENSG00000167291	TBC1D16	protein_coding	25	2	35	NA	NA	0
PRPF8	ENSG00000167306	MYO5B	protein_coding	25	3	31	0.416	NA	0
PRPF8	ENSG00000167880	EVPL	protein_coding	25	2	31	NA	NA	0
PRPF8	ENSG00000168268	NT5DC2	protein_coding	25	4	42	-1343	NA	0
PRPF8	ENSG00000168763	CNNM3	protein_coding	25	4	45	NA	NA	0
PRPF8	ENSG00000168918	INPP5D	protein_coding	25	4	38	0.535	-1252	0
PRPF8	ENSG00000169554	ZEB2	protein_coding	25	2	37	NA	NA	0
PRPF8	ENSG00000169679	BUB1	protein_coding	25	4	40	-1969	-0.652	0
PRPF8	ENSG00000171606	ZNF274	protein_coding	25	4	47	1007	0.521	0
PRPF8	ENSG00000173442	EHBP1L1	protein_coding	25	4	37	-0.762	-0.596	0
PRPF8	ENSG00000175224	ATG13	protein_coding	25	4	45	-0.270	NA	0
PRPF8	ENSG00000179698	WDR97	protein_coding	25	3	30	NA	NA	0
PRPF8	ENSG00000183258	DDX41	protein_coding	25	4	45	NA	0.373	0
PRPF8	ENSG00000183431	SF3A3	protein_coding	25	4	50	NA	0.186	0
PRPF8	ENSG00000188559	RALGAPA2	protein_coding	25	4	34	-0.603	-1228	0
PRPF8	ENSG00000196155	PLEKHG4	protein_coding	25	4	40	NA	-0.622	0
PRPF8	ENSG00000196510	ANAPC7	protein_coding	25	4	41	NA	NA	0
PRPF8	ENSG00000197321	SVIL	protein_coding	25	2	34	NA	NA	0
PRPF8	ENSG00000197565	COL4A6	protein_coding	25	2	29	NA	NA	0
PRPF8	ENSG00000197774	EME2	protein_coding	25	4	49	0.599	0.733	0
PRPF8	ENSG00000197818	SLC9A8	protein_coding	25	4	38	NA	NA	0
PRPF8	ENSG00000203485	INF2	protein_coding	25	4	34	NA	NA	0
PRPF8	ENSG00000204267	TAP2	protein_coding	25	4	43	NA	-0.410	0
PRPF8	ENSG00000204628	RACK1	protein_coding	25	4	61	-0.377	NA	0
PRPF8	ENSG00000205531	NAP1L4	protein_coding	25	4	44	-0.485	0.175	0
PRPF8	ENSG00000206530	CFAP44	protein_coding	25	3	29	-0.914	NA	0
PRPF8	ENSG00000225190	PLEKHM1	protein_coding	25	4	42	0.550	0.909	0
PRPF8	ENSG00000242259	C22orf39	protein_coding	25	4	41	NA	-0.919	0
PRPF8	ENSG00000250264	AL669918.1	protein_coding	25	4	43	NA	5729	0
PRPF8	ENSG00000255663	AP002373.1	protein_coding	25	4	37	NA	2717	0
PRPF8	ENSG00000261150	EPPK1	protein_coding	25	4	37	NA	-1008	0
PRPF8	ENSG00000262246	CORO7	protein_coding	25	4	40	NA	NA	0
PRPF8	ENSG00000267059	AC005943.1	protein_coding	25	4	38	NA	7747	0
PRPF8	ENSG00000269881	AC004754.1	protein_coding	25	4	35	NA	NA	0
PRPF8	ENSG00000272772	AC104109.3	protein_coding	25	4	51	NA	NA	0
PRPF8	ENSG00000273398	AC017083.3	protein_coding	25	4	35	NA	NA	0
PRPF8	ENSG00000275993	SIK1B	protein_coding	25	4	46	NA	NA	0
PRPF8	ENSG00000283900	Z98749.3	protein_coding	25	4	42	NA	NA	0
PRPF8	ENSG00000006125	AP2B1	protein_coding	24	4	35	0.392	-0.414	0
PRPF8	ENSG00000006744	ELAC2	protein_coding	24	4	43	NA	NA	0
PRPF8	ENSG00000011114	BTBD7	protein_coding	24	4	42	NA	NA	0
PRPF8	ENSG00000013523	ANGEL1	protein_coding	24	4	35	NA	-0.691	0
PRPF8	ENSG00000018510	AGPS	protein_coding	24	4	36	NA	NA	0
PRPF8	ENSG00000025800	KPNA6	protein_coding	24	4	46	NA	NA	0
PRPF8	ENSG00000039650	PNKP	protein_coding	24	4	36	NA	NA	0
PRPF8	ENSG00000048028	USP28	protein_coding	24	4	32	-0.784	NA	0
PRPF8	ENSG00000057252	SOAT1	protein_coding	24	4	39	-1327	NA	0
PRPF8	ENSG00000058453	CROCC	protein_coding	24	4	30	NA	NA	0
PRPF8	ENSG00000059122	FLYWCH1	protein_coding	24	4	44	NA	NA	0
PRPF8	ENSG00000062598	ELMO2	protein_coding	24	4	36	NA	NA	0
PRPF8	ENSG00000063176	SPHK2	protein_coding	24	4	30	NA	NA	0
PRPF8	ENSG00000063854	HAGH	protein_coding	24	4	36	NA	-1118	0
PRPF8	ENSG00000064012	CASP8	protein_coding	24	4	36	0.585	1033	0
PRPF8	ENSG00000064607	SUGP2	protein_coding	24	4	50	-0.528	-0.830	0
PRPF8	ENSG00000064651	SLC12A2	protein_coding	24	4	39	NA	NA	0
PRPF8	ENSG00000068078	FGFR3	protein_coding	24	4	39	NA	NA	0
PRPF8	ENSG00000071127	WDR1	protein_coding	24	4	44	0.338	0.559	0
PRPF8	ENSG00000072736	NFATC3	protein_coding	24	4	37	-0.404	-0.528	0
PRPF8	ENSG00000073060	SCARB1	protein_coding	24	4	44	-1066	-2044	0
PRPF8	ENSG00000074935	TUBE1	protein_coding	24	4	36	NA	NA	0
PRPF8	ENSG00000078043	PIAS2	protein_coding	24	4	34	-0.788	NA	0
PRPF8	ENSG00000078177	N4BP2	protein_coding	24	4	35	NA	-0.371	0
PRPF8	ENSG00000081791	KIAA0141	protein_coding	24	4	42	-0.267	-0.724	0
PRPF8	ENSG00000085733	CTTN	protein_coding	24	4	52	0.231	NA	0
PRPF8	ENSG00000089057	SLC23A2	protein_coding	24	4	40	NA	NA	0
PRPF8	ENSG00000090097	PCBP4	protein_coding	24	4	37	NA	NA	0
PRPF8	ENSG00000095564	BTAF1	protein_coding	24	4	34	-0.594	-0.352	0
PRPF8	ENSG00000096401	CDC5L	protein_coding	24	4	30	-0.535	0.345	0
PRPF8	ENSG00000099308	MAST3	protein_coding	24	4	40	0.507	NA	0
PRPF8	ENSG00000099821	POLRMT	protein_coding	24	4	44	NA	NA	0
PRPF8	ENSG00000099949	LZTR1	protein_coding	24	4	46	0.450	0.604	0
PRPF8	ENSG00000099995	SF3A1	protein_coding	24	4	40	NA	NA	0
PRPF8	ENSG00000100077	GRK3	protein_coding	24	4	37	-0.814	NA	0
PRPF8	ENSG00000100811	YY1	protein_coding	24	4	43	-0.255	NA	0
PRPF8	ENSG00000100918	REC8	protein_coding	24	4	34	2077	NA	0
PRPF8	ENSG00000101109	STK4	protein_coding	24	4	41	-0.306	NA	0
PRPF8	ENSG00000103064	SLC7A6	protein_coding	24	4	43	0.443	NA	0
PRPF8	ENSG00000103111	MON1B	protein_coding	24	4	43	0.402	NA	0
PRPF8	ENSG00000103245	NARFL	protein_coding	24	4	46	0.724	1032	0
PRPF8	ENSG00000104408	EIF3E	protein_coding	24	4	43	NA	NA	0
PRPF8	ENSG00000104946	TBC1D17	protein_coding	24	4	42	NA	NA	0
PRPF8	ENSG00000105810	CDK6	protein_coding	24	4	39	NA	-0.526	0
PRPF8	ENSG00000105821	DNAJC2	protein_coding	24	4	48	NA	0.857	0
PRPF8	ENSG00000106351	AGFG2	protein_coding	24	4	40	NA	NA	0
PRPF8	ENSG00000107959	PITRM1	protein_coding	24	4	40	NA	-0.464	0
PRPF8	ENSG00000108592	FTSJ3	protein_coding	24	4	36	NA	NA	0
PRPF8	ENSG00000108671	PSMD11	protein_coding	24	4	46	-0.469	0.355	0
PRPF8	ENSG00000108854	SMURF2	protein_coding	24	4	31	NA	NA	0
PRPF8	ENSG00000109046	WSB1	protein_coding	24	4	44	-0.779	-0.960	0
PRPF8	ENSG00000110497	AMBRA1	protein_coding	24	4	41	NA	0.588	0
PRPF8	ENSG00000111647	UHRF1BP1L	protein_coding	24	4	29	NA	NA	0
PRPF8	ENSG00000111707	SUDS3	protein_coding	24	4	35	NA	NA	0
PRPF8	ENSG00000112062	MAPK14	protein_coding	24	4	36	-0.259	NA	0
PRPF8	ENSG00000112130	RNF8	protein_coding	24	4	33	-0.665	NA	0
PRPF8	ENSG00000112419	PHACTR2	protein_coding	24	4	30	0.470	NA	0
PRPF8	ENSG00000114098	ARMC8	protein_coding	24	4	46	NA	NA	0
PRPF8	ENSG00000115568	ZNF142	protein_coding	24	4	37	NA	NA	0
PRPF8	ENSG00000115694	STK25	protein_coding	24	4	47	NA	-0.672	0
PRPF8	ENSG00000115902	SLC1A4	protein_coding	24	4	33	0.471	-0.658	0
PRPF8	ENSG00000116213	WRAP73	protein_coding	24	4	45	0.928	NA	0
PRPF8	ENSG00000117385	P3H1	protein_coding	24	4	51	-0.755	NA	0
PRPF8	ENSG00000117408	IPO13	protein_coding	24	4	39	NA	NA	0
PRPF8	ENSG00000117616	RSRP1	protein_coding	24	4	44	NA	NA	0
PRPF8	ENSG00000117625	RCOR3	protein_coding	24	4	41	NA	NA	0
PRPF8	ENSG00000119041	GTF3C3	protein_coding	24	4	38	0.224	NA	0
PRPF8	ENSG00000119042	SATB2	protein_coding	24	4	39	NA	NA	0
PRPF8	ENSG00000119185	ITGB1BP1	protein_coding	24	4	36	NA	NA	0
PRPF8	ENSG00000119682	AREL1	protein_coding	24	4	40	0.337	NA	0
PRPF8	ENSG00000119684	MLH3	protein_coding	24	4	42	NA	NA	0
PRPF8	ENSG00000122545	2020-09-07	protein_coding	24	4	44	NA	0.425	0
PRPF8	ENSG00000124151	NCOA3	protein_coding	24	4	36	-0.291	NA	0
PRPF8	ENSG00000125046	SSUH2	protein_coding	24	2	33	NA	NA	0
PRPF8	ENSG00000125450	NUP85	protein_coding	24	4	51	-0.717	NA	0
PRPF8	ENSG00000125686	MED1	protein_coding	24	4	46	NA	0.162	0
PRPF8	ENSG00000126107	HECTD3	protein_coding	24	4	37	0.306	NA	0
PRPF8	ENSG00000126562	WNK4	protein_coding	24	4	32	-1515	-0.586	0
PRPF8	ENSG00000126822	PLEKHG3	protein_coding	24	2	32	0.564	NA	0
PRPF8	ENSG00000127399	LRRC61	protein_coding	24	4	31	NA	-1396	0
PRPF8	ENSG00000127564	PKMYT1	protein_coding	24	4	53	-1940	NA	0
PRPF8	ENSG00000129315	CCNT1	protein_coding	24	4	41	0.355	0.389	0
PRPF8	ENSG00000129422	MTUS1	protein_coding	24	2	32	-0.553	NA	0
PRPF8	ENSG00000129691	ASH2L	protein_coding	24	4	38	NA	-0.357	0
PRPF8	ENSG00000130175	PRKCSH	protein_coding	24	4	39	NA	NA	0
PRPF8	ENSG00000130227	XPO7	protein_coding	24	4	36	-0.590	0.206	0
PRPF8	ENSG00000130338	TULP4	protein_coding	24	4	41	0.990	NA	0
PRPF8	ENSG00000130517	PGPEP1	protein_coding	24	4	37	NA	-0.675	0
PRPF8	ENSG00000130726	TRIM28	protein_coding	24	4	53	-0.599	NA	0
PRPF8	ENSG00000130803	ZNF317	protein_coding	24	4	37	NA	0.372	0
PRPF8	ENSG00000131023	LATS1	protein_coding	24	4	31	0.512	0.532	0
PRPF8	ENSG00000131381	RBSN	protein_coding	24	4	42	NA	NA	0
PRPF8	ENSG00000131389	SLC6A6	protein_coding	24	4	46	-0.777	-1553	0
PRPF8	ENSG00000131398	KCNC3	protein_coding	24	4	33	NA	-1066	0
PRPF8	ENSG00000132613	MTSS1L	protein_coding	24	4	46	NA	0.707	0
PRPF8	ENSG00000133816	MICAL2	protein_coding	24	3	30	0.898	NA	0
PRPF8	ENSG00000134262	AP4B1	protein_coding	24	4	36	NA	NA	0
PRPF8	ENSG00000134815	DHX34	protein_coding	24	4	45	NA	NA	0
PRPF8	ENSG00000135090	TAOK3	protein_coding	24	4	34	0.610	NA	0
PRPF8	ENSG00000135655	USP15	protein_coding	24	4	45	NA	NA	0
PRPF8	ENSG00000136051	WASHC4	protein_coding	24	4	37	0.729	NA	0
PRPF8	ENSG00000136237	RAPGEF5	protein_coding	24	3	34	NA	NA	0
PRPF8	ENSG00000138035	PNPT1	protein_coding	24	4	32	NA	NA	0
PRPF8	ENSG00000138078	PREPL	protein_coding	24	4	39	0.363	-0.721	0
PRPF8	ENSG00000138182	KIF20B	protein_coding	24	4	34	-1369	NA	0
PRPF8	ENSG00000138756	BMP2K	protein_coding	24	4	43	0.467	-0.418	0
PRPF8	ENSG00000138757	G3BP2	protein_coding	24	4	35	NA	NA	0
PRPF8	ENSG00000139644	TMBIM6	protein_coding	24	4	45	0.342	0.609	0
PRPF8	ENSG00000140386	SCAPER	protein_coding	24	4	33	NA	NA	0
PRPF8	ENSG00000140853	NLRC5	protein_coding	24	2	29	NA	NA	0
PRPF8	ENSG00000142599	RERE	protein_coding	24	4	39	NA	NA	0
PRPF8	ENSG00000142687	KIAA0319L	protein_coding	24	4	43	NA	-1084	0
PRPF8	ENSG00000142864	SERBP1	protein_coding	24	4	53	-0.598	NA	0
PRPF8	ENSG00000143889	HNRNPLL	protein_coding	24	4	42	NA	NA	0
PRPF8	ENSG00000144591	GMPPA	protein_coding	24	4	53	-0.574	NA	0
PRPF8	ENSG00000144747	TMF1	protein_coding	24	4	35	NA	NA	0
PRPF8	ENSG00000145390	USP53	protein_coding	24	4	34	NA	NA	0
PRPF8	ENSG00000146426	TIAM2	protein_coding	24	4	32	1112	NA	0
PRPF8	ENSG00000146731	CCT6A	protein_coding	24	4	39	NA	0.456	0
PRPF8	ENSG00000148120	C9orf3	protein_coding	24	4	33	NA	NA	0
PRPF8	ENSG00000155846	PPARGC1B	protein_coding	24	4	33	NA	-0.714	0
PRPF8	ENSG00000157107	FCHO2	protein_coding	24	4	34	0.548	NA	0
PRPF8	ENSG00000160767	FAM189B	protein_coding	24	4	34	-0.956	-0.484	0
PRPF8	ENSG00000160961	ZNF333	protein_coding	24	4	39	NA	NA	0
PRPF8	ENSG00000160972	PPP1R16A	protein_coding	24	4	39	NA	0.985	0
PRPF8	ENSG00000161526	SAP30BP	protein_coding	24	4	49	NA	0.826	0
PRPF8	ENSG00000162408	NOL9	protein_coding	24	4	45	NA	NA	0
PRPF8	ENSG00000163389	POGLUT1	protein_coding	24	4	36	NA	NA	0
PRPF8	ENSG00000163631	ALB	protein_coding	24	2	39	-0.307	NA	0
PRPF8	ENSG00000163900	TMEM41A	protein_coding	24	4	38	-0.936	-0.281	0
PRPF8	ENSG00000163904	SENP2	protein_coding	24	4	38	-0.477	0.231	0
[truncated: 11,096 more rows]

## Sheet: Pathways
pathwayName	log10(pval)	log10(FDR)	backgroundGeneNum	pathwayGeneNum	targetGeneNum	commonGeneNum
KEGG_Spliceosome	-16.7613	-14.4918	20628	128	12886	121
KEGG_Ribosome	-13.62	-11.6516	20628	88	12886	85
KEGG_Cell_Cycle	-13.1928	-11.4005	20628	128	12886	117
KEGG_Ubiquitin_Mediated_Proteolysis	-11.844	-10.1765	20628	138	12886	123
KEGG_Lysosome	-9.88493	-8.31439	20628	121	12886	107
KEGG_Pyrimidine_Metabolism	-9.03617	-7.5448	20628	98	12886	88
KEGG_Chronic_Myeloid_Leukemia	-8.81453	-7.39012	20628	73	12886	68
KEGG_Insulin_Signaling_Pathway	-8.60883	-7.24241	20628	137	12886	117
KEGG_Prostate_Cancer	-8.31475	-6.99948	20628	89	12886	80
KEGG_Endocytosis	-8.17455	-6.90504	20628	183	12886	150
KEGG_Nucleotide_Excision_Repair	-7.56319	-6.33507	20628	44	12886	43
KEGG_Pancreatic_Cancer	-7.46191	-6.27158	20628	70	12886	64
KEGG_Peroxisome	-7.27144	-6.11587	20628	78	12886	70
KEGG_Aminoacyl_Trna_Biosynthesis	-6.97819	-5.85481	20628	41	12886	40
KEGG_Endometrial_Cancer	-6.91311	-5.81969	20628	52	12886	49
KEGG_N_Glycan_Biosynthesis	-6.80538	-5.73999	20628	46	12886	44
KEGG_Valine_Leucine_And_Isoleucine_Degradation	-6.43327	-5.39421	20628	44	12886	42
KEGG_Rna_Degradation	-6.40732	-5.39308	20628	59	12886	54
KEGG_Non_Small_Cell_Lung_Cancer	-6.37268	-5.38192	20628	54	12886	50
KEGG_Neurotrophin_Signaling_Pathway	-6.15189	-5.1834	20628	126	12886	104
KEGG_Colorectal_Cancer	-6.14078	-5.19348	20628	62	12886	56
KEGG_Dna_Replication	-6.00839	-5.0813	20628	36	12886	35
KEGG_Rna_Polymerase	-5.93097	-5.02319	20628	29	12886	29
KEGG_P53_Signaling_Pathway	-5.23299	-4.34369	20628	69	12886	60
KEGG_Adherens_Junction	-4.94507	-4.0735	20628	75	12886	64
KEGG_Pathways_In_Cancer	-4.85136	-3.99682	20628	328	12886	241
KEGG_Base_Excision_Repair	-4.78291	-3.94476	20628	35	12886	33
KEGG_B_Cell_Receptor_Signaling_Pathway	-4.42052	-3.59816	20628	75	12886	63
KEGG_Fc_Gamma_R_Mediated_Phagocytosis	-4.39929	-3.59218	20628	97	12886	79
KEGG_Renal_Cell_Carcinoma	-4.26258	-3.47018	20628	70	12886	59
KEGG_Inositol_Phosphate_Metabolism	-4.22832	-3.45017	20628	54	12886	47
KEGG_Small_Cell_Lung_Cancer	-4.14297	-3.37861	20628	84	12886	69
KEGG_Glioma	-4.10578	-3.35478	20628	65	12886	55
KEGG_Erbb_Signaling_Pathway	-4.06601	-3.32797	20628	87	12886	71
KEGG_Huntingtons_Disease	-4.06413	-3.33868	20628	185	12886	140
KEGG_Phosphatidylinositol_Signaling_System	-4.06297	-3.34976	20628	76	12886	63
KEGG_Amino_Sugar_And_Nucleotide_Sugar_Metabolism	-3.97171	-3.2704	20628	44	12886	39
KEGG_Progesterone_Mediated_Oocyte_Maturation	-3.9462	-3.25647	20628	86	12886	70
KEGG_Glycosylphosphatidylinositol_Gpi_Anchor_Biosynthesis	-3.90685	-3.2284	20628	25	12886	24
KEGG_Thyroid_Cancer	-3.71185	-3.0444	20628	29	12886	27
KEGG_Bladder_Cancer	-3.66308	-3.00635	20628	42	12886	37
KEGG_Oocyte_Meiosis	-3.58804	-2.94178	20628	114	12886	89
KEGG_Mismatch_Repair	-3.5315	-2.89546	20628	23	12886	22
KEGG_One_Carbon_Pool_By_Folate	-3.47548	-2.84942	20628	17	12886	17
KEGG_Acute_Myeloid_Leukemia	-3.44131	-2.82501	20628	60	12886	50
KEGG_Citrate_Cycle_Tca_Cycle	-3.43692	-2.83016	20628	32	12886	29
KEGG_Adipocytokine_Signaling_Pathway	-3.39547	-2.79805	20628	67	12886	55
KEGG_Mtor_Signaling_Pathway	-3.38218	-2.79391	20628	52	12886	44
KEGG_Mapk_Signaling_Pathway	-3.36849	-2.78917	20628	267	12886	193
KEGG_Vasopressin_Regulated_Water_Reabsorption	-3.35441	-2.78387	20628	44	12886	38
KEGG_Pathogenic_Escherichia_Coli_Infection	-3.31209	-2.75015	20628	59	12886	49
KEGG_Glycine_Serine_And_Threonine_Metabolism	-3.27246	-2.71895	20628	31	12886	28
KEGG_Purine_Metabolism	-3.21424	-2.669	20628	159	12886	119
KEGG_Snare_Interactions_In_Vesicular_Transport	-3.06096	-2.52384	20628	38	12886	33
KEGG_Propanoate_Metabolism	-2.9185	-2.38935	20628	33	12886	29
KEGG_Proteasome	-2.84769	-2.32636	20628	48	12886	40
KEGG_Protein_Export	-2.84539	-2.33175	20628	24	12886	22
KEGG_Lysine_Degradation	-2.8129	-2.30681	20628	44	12886	37
KEGG_Regulation_Of_Actin_Cytoskeleton	-2.81252	-2.31386	20628	216	12886	156
KEGG_Homologous_Recombination	-2.78708	-2.29571	20628	28	12886	25
KEGG_Basal_Transcription_Factors	-2.76851	-2.28433	20628	36	12886	31
KEGG_Notch_Signaling_Pathway	-2.7178	-2.24068	20628	47	12886	39
KEGG_Apoptosis	-2.66057	-2.1904	20628	88	12886	68
KEGG_Fatty_Acid_Metabolism	-2.54704	-2.0837	20628	42	12886	35
KEGG_Fructose_And_Mannose_Metabolism	-2.48264	-2.02604	20628	34	12886	29
KEGG_Selenoamino_Acid_Metabolism	-2.47108	-2.02111	20628	26	12886	23
KEGG_Steroid_Biosynthesis	-2.42524	-1.98181	20628	17	12886	16
KEGG_Epithelial_Cell_Signaling_In_Helicobacter_Pylori_Infection	-2.32368	-1.88668	20628	68	12886	53
KEGG_Alzheimers_Disease	-2.31364	-1.88297	20628	169	12886	122
KEGG_Pyruvate_Metabolism	-2.28815	-1.86373	20628	40	12886	33
KEGG_Other_Glycan_Degradation	-2.24465	-1.8264	20628	16	12886	15
KEGG_Alanine_Aspartate_And_Glutamate_Metabolism	-2.20408	-1.7919	20628	32	12886	27
KEGG_T_Cell_Receptor_Signaling_Pathway	-2.14517	-1.73898	20628	108	12886	80
KEGG_Vegf_Signaling_Pathway	-2.1372	-1.73692	20628	76	12886	58
KEGG_Limonene_And_Pinene_Degradation	-2.04396	-1.64951	20628	10	12886	10
KEGG_Cysteine_And_Methionine_Metabolism	-1.98296	-1.59426	20628	34	12886	28
KEGG_Butanoate_Metabolism	-1.98296	-1.59426	20628	34	12886	28
KEGG_Beta_Alanine_Metabolism	-1.8616	-1.48418	20628	22	12886	19
KEGG_Glutathione_Metabolism	-1.84148	-1.46959	20628	50	12886	39
KEGG_Gnrh_Signaling_Pathway	-1.83847	-1.47205	20628	101	12886	74
KEGG_Fc_Epsilon_Ri_Signaling_Pathway	-1.82994	-1.46891	20628	79	12886	59
KEGG_Vibrio_Cholerae_Infection	-1.78104	-1.42534	20628	56	12886	43
KEGG_Circadian_Rhythm_Mammal	-1.71204	-1.3616	20628	13	12886	12
KEGG_Glycerophospholipid_Metabolism	-1.66158	-1.31635	20628	77	12886	57
