# Supplementary material for: Impaired mRNA splicing and proteostasis in preadipocytes in obesity-related metabolic disease
Source: eLife journal article supplement (doi:10.7554/elife.65996), 2021-09-21

Figure 1—Figure supplement 3

A SC Preadipocytes vs. OM Preadipocytes

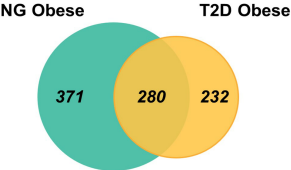

B

SC Preadipocytes vs. OM Preadipocytes dysregulated pathways in NG Obese

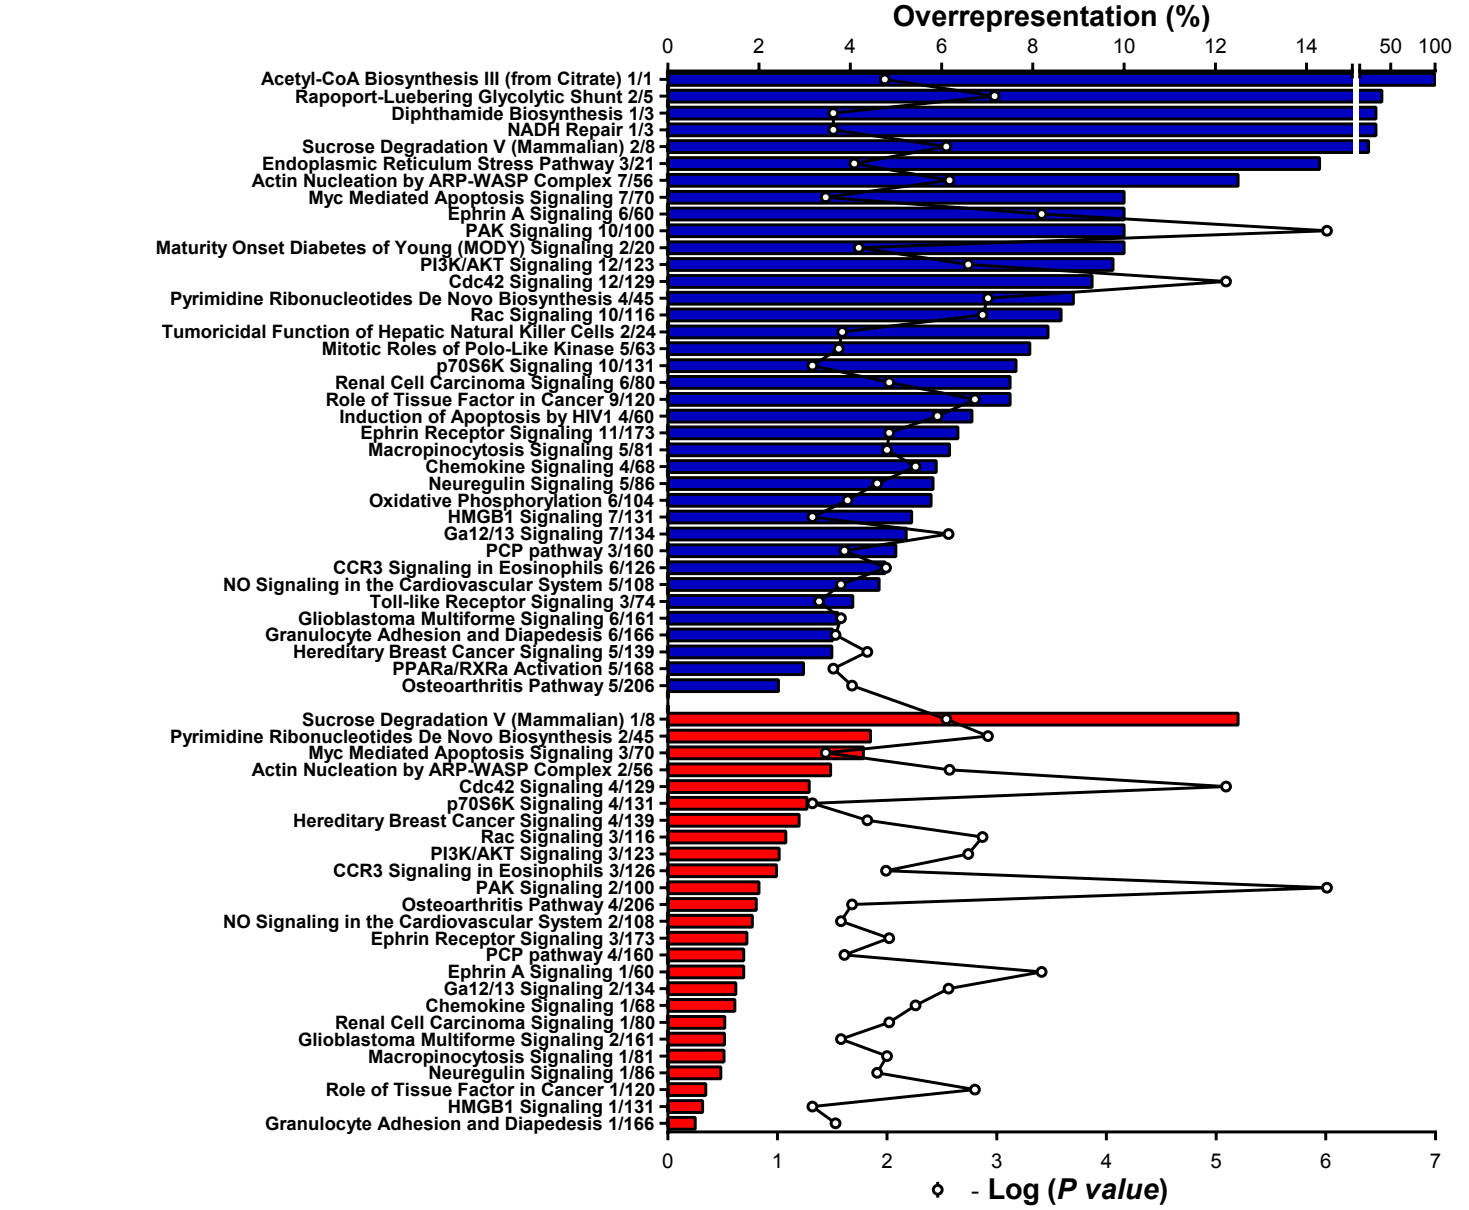

C

SC Preadipocytes vs. OM Preadipocytes dysregulated pathways in T2D Obese

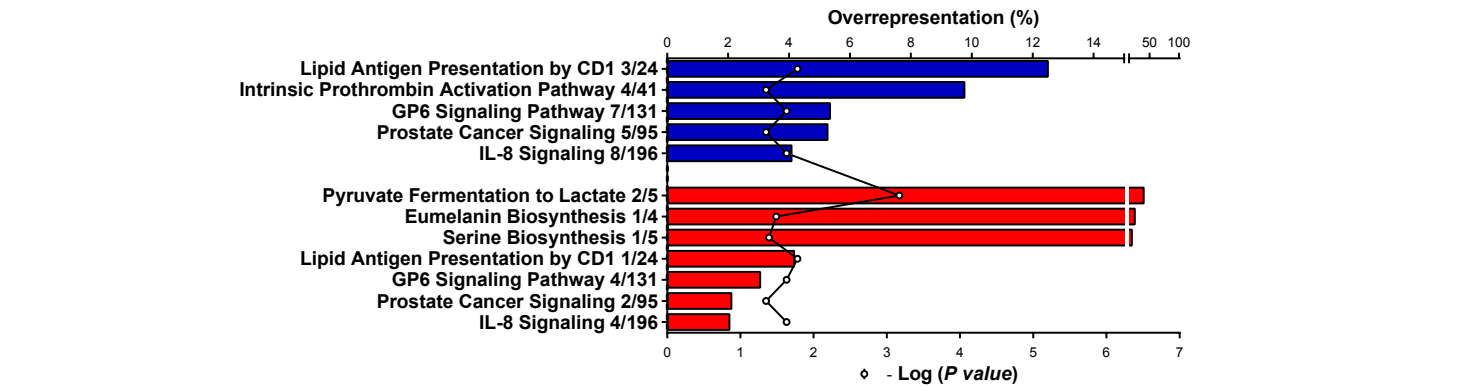

Supplement: supp [file elife_poa_e65996_Figure_1_figure_supplement_3.pdf › elife_poa_e65996_Figure_1_figure_supplement_3.pdf]
