# Supplementary figures and images for: Impaired mRNA splicing and proteostasis in preadipocytes in obesity-related metabolic disease
Source: eLife journal article supplement (doi:10.7554/elife.65996), 2021-09-21

Figure 1—Figure supplement 1

A

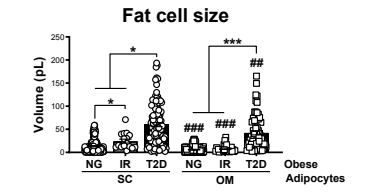

B

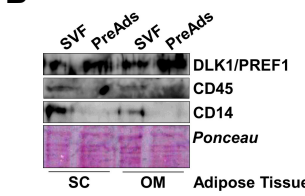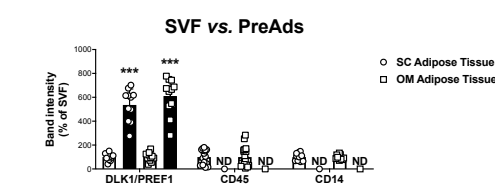

C

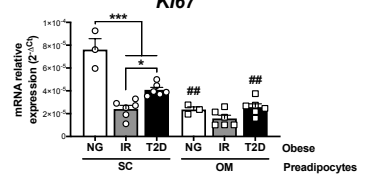

D

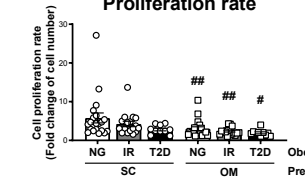

E

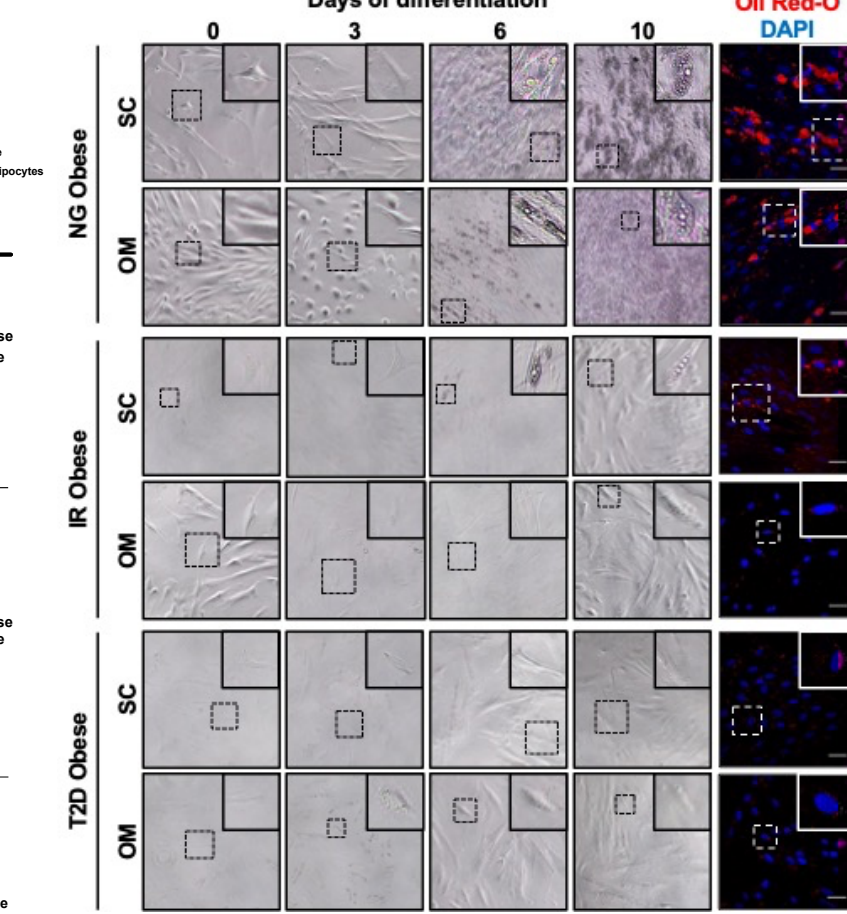

F

**SC Preadipocytes**

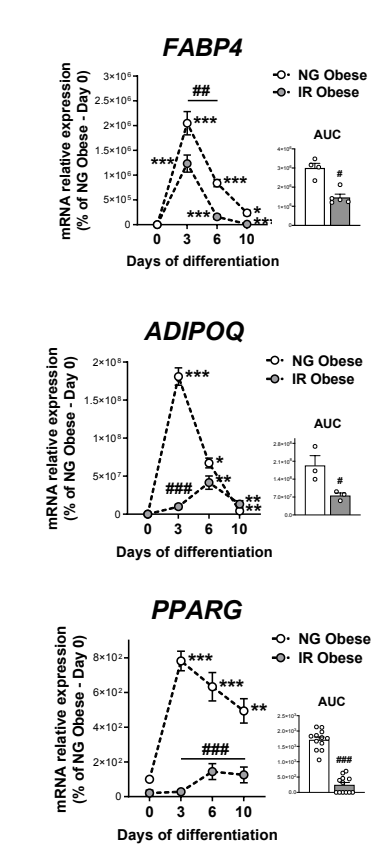

**OM Preadipocytes**

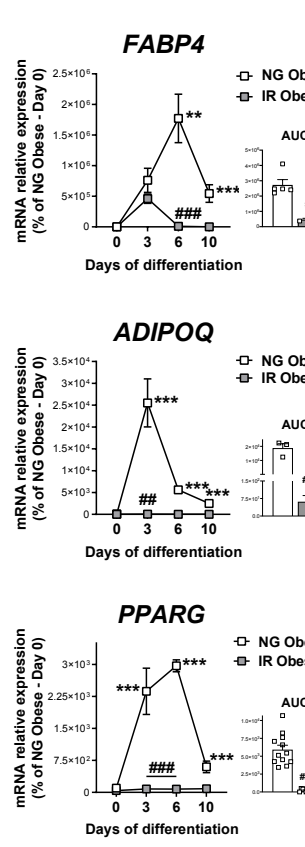

Supplement: supp [file elife_poa_e65996_Figure_1_figure_supplement_1.pdf › elife_poa_e65996_Figure_1_figure_supplement_1.pdf]

Figure 1—Figure supplement 2

A

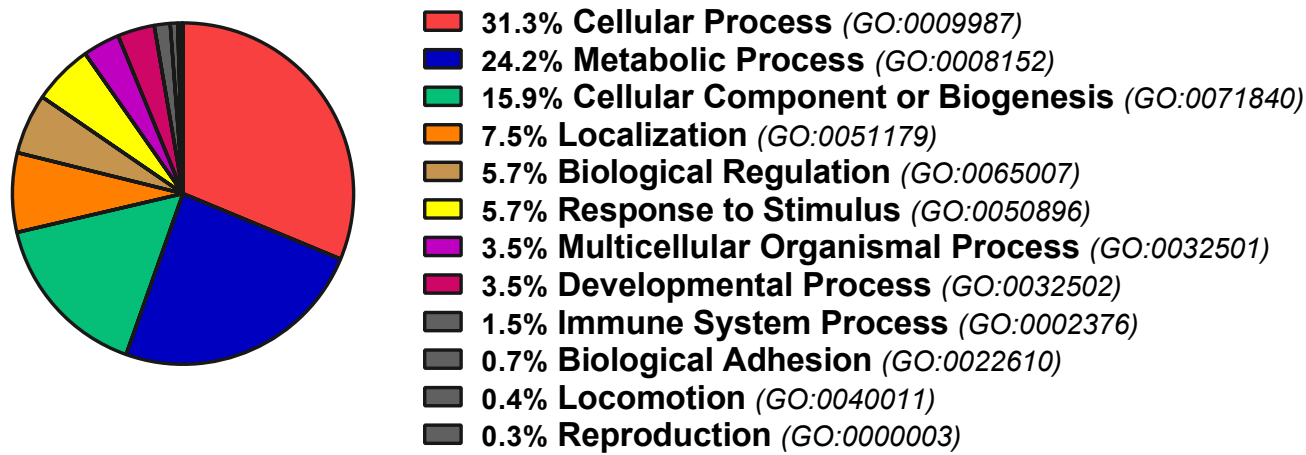

B

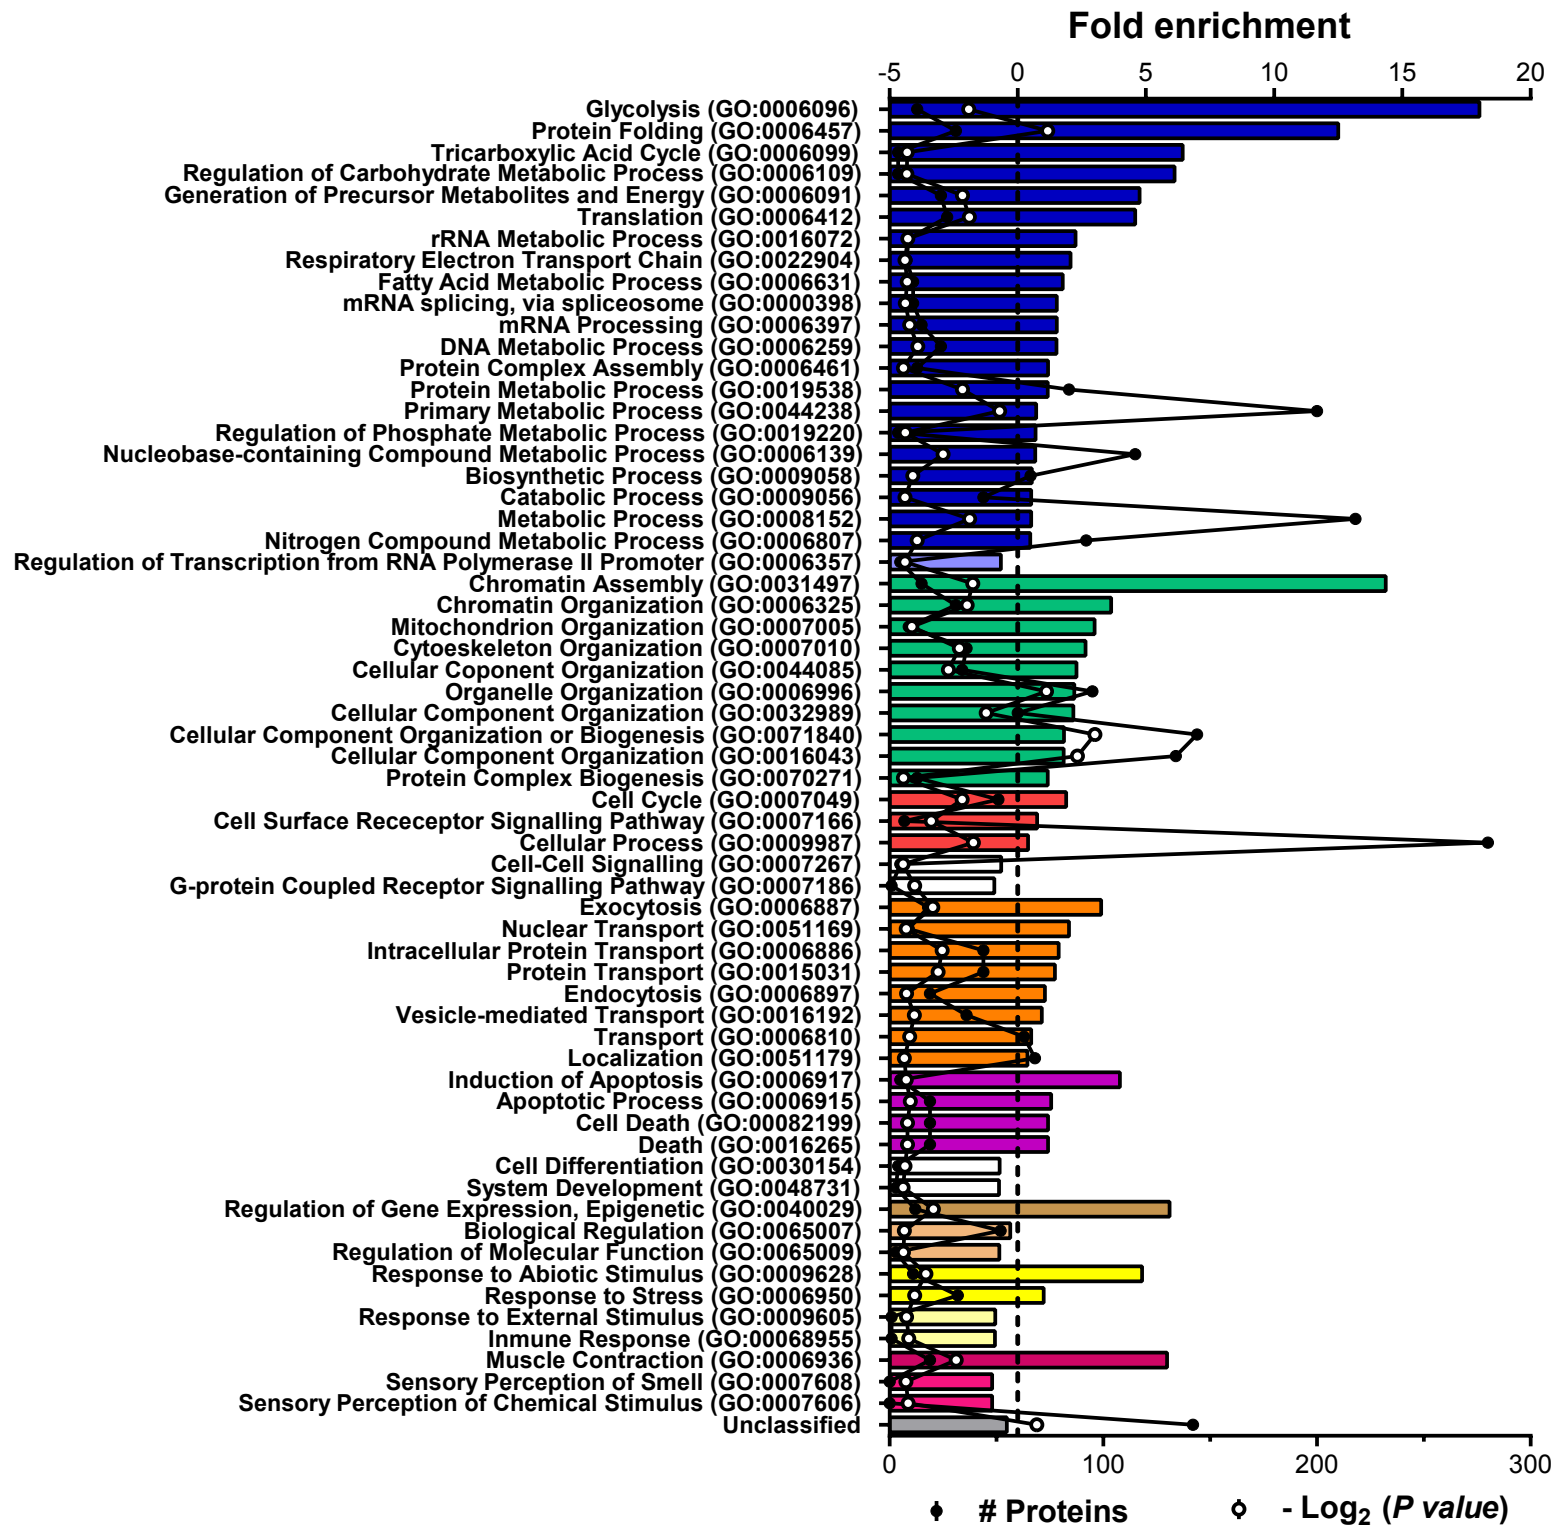

Supplement: supp [file elife_poa_e65996_Figure_1_figure_supplement_2.pdf › elife_poa_e65996_Figure_1_figure_supplement_2.pdf]

Figure 2—Figure supplement 1

A

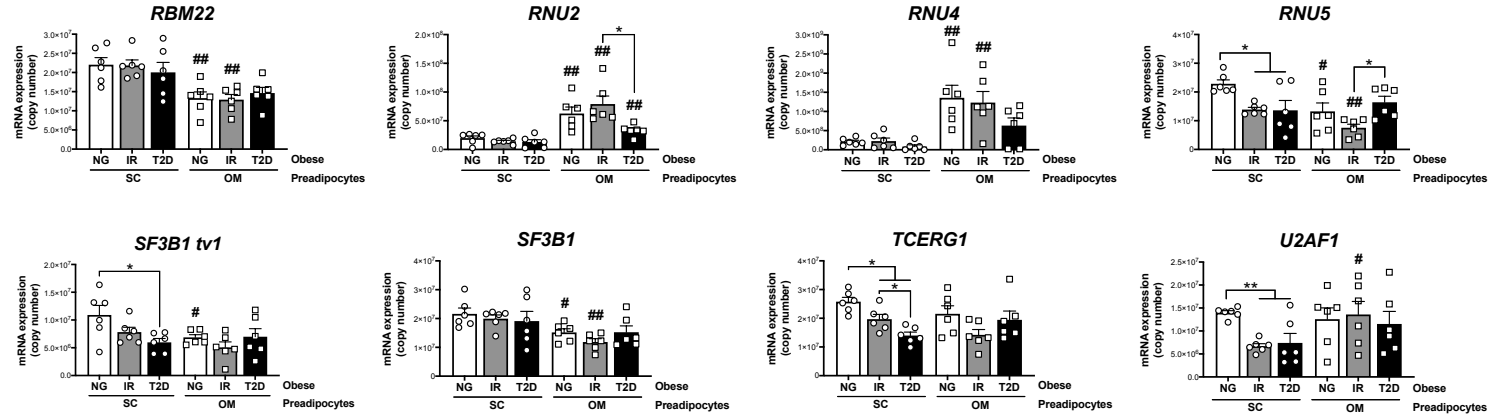

B

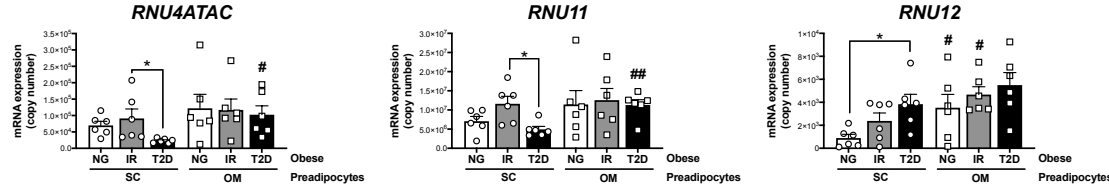

C

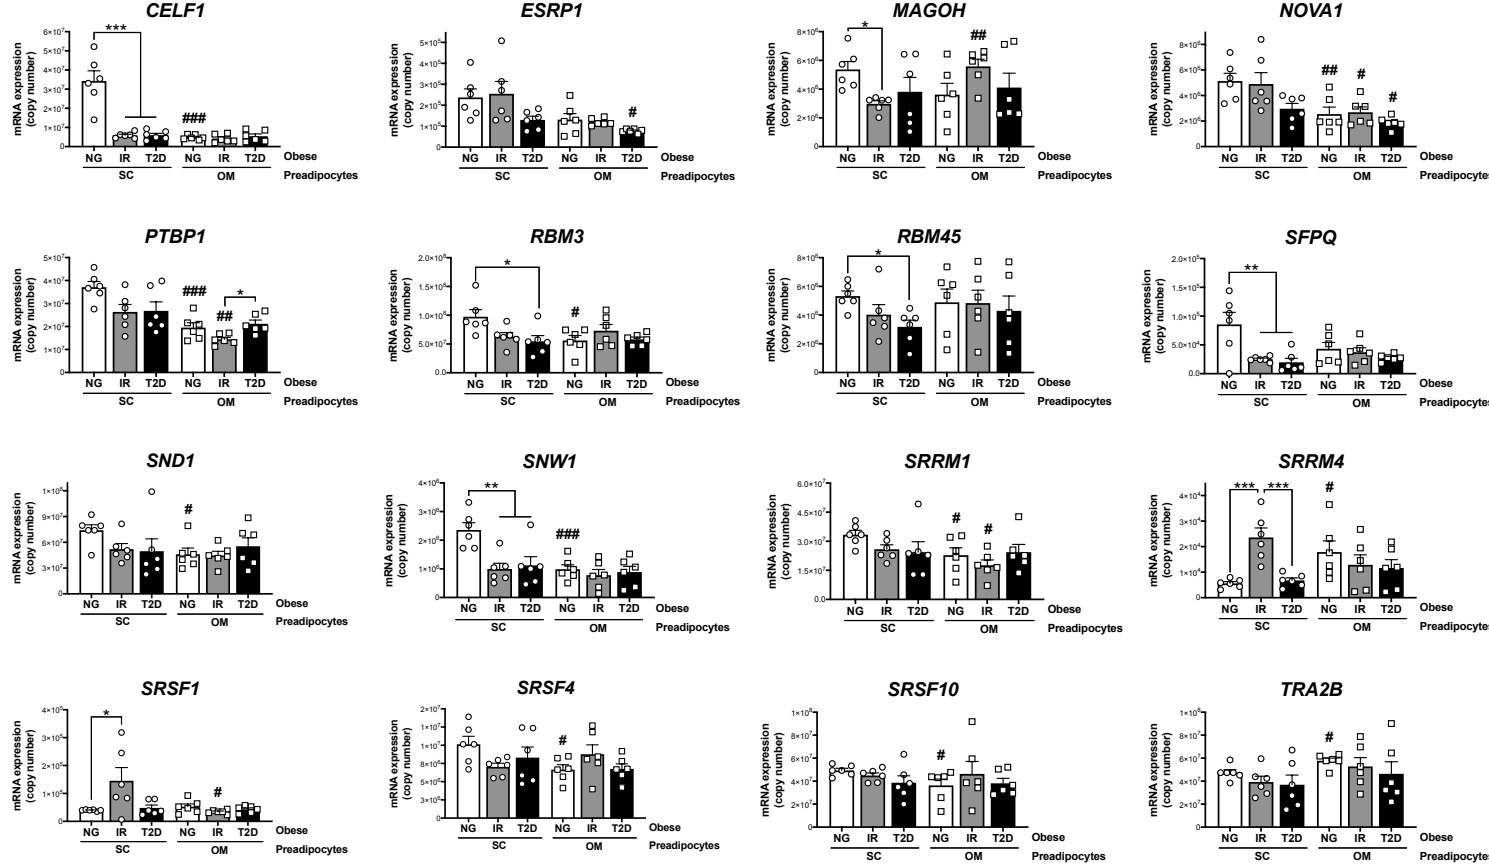

Supplement: supp [file elife_poa_e65996_Figure_2_figure_supplement_1.pdf › elife_poa_e65996_Figure_2_figure_supplement_1.pdf]

**Figure 2—Figure supplement 2**

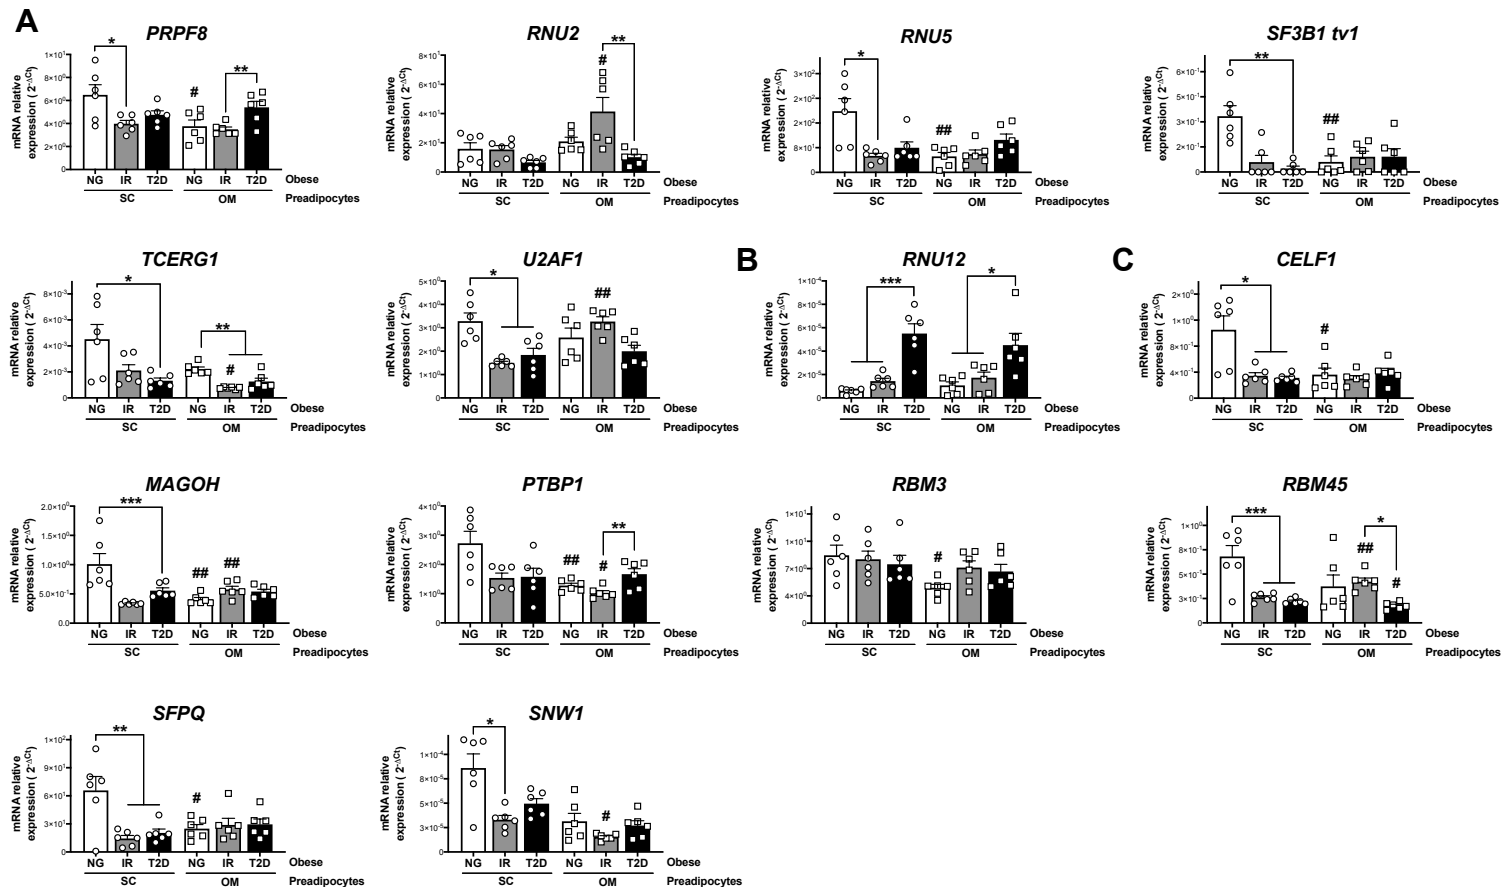

Supplement: supp [file elife_poa_e65996_Figure_2_figure_supplement_2.pdf › elife_poa_e65996_Figure_2_figure_supplement_2.pdf]

Figure 2 - Figure supplement 3

A

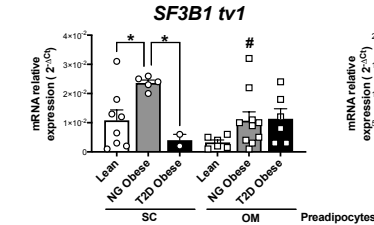

B

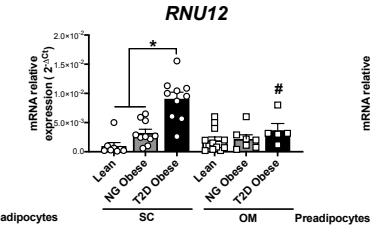

C

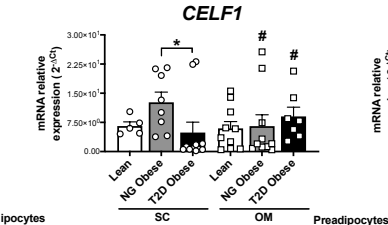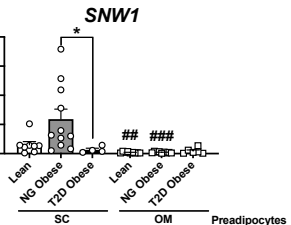

Supplement: supp [file elife_poa_e65996_Figure_2_figure_supplement_3.pdf › elife_poa_e65996_Figure_2_figure_supplement_3.pdf]

Figure 3—Figure supplement 1

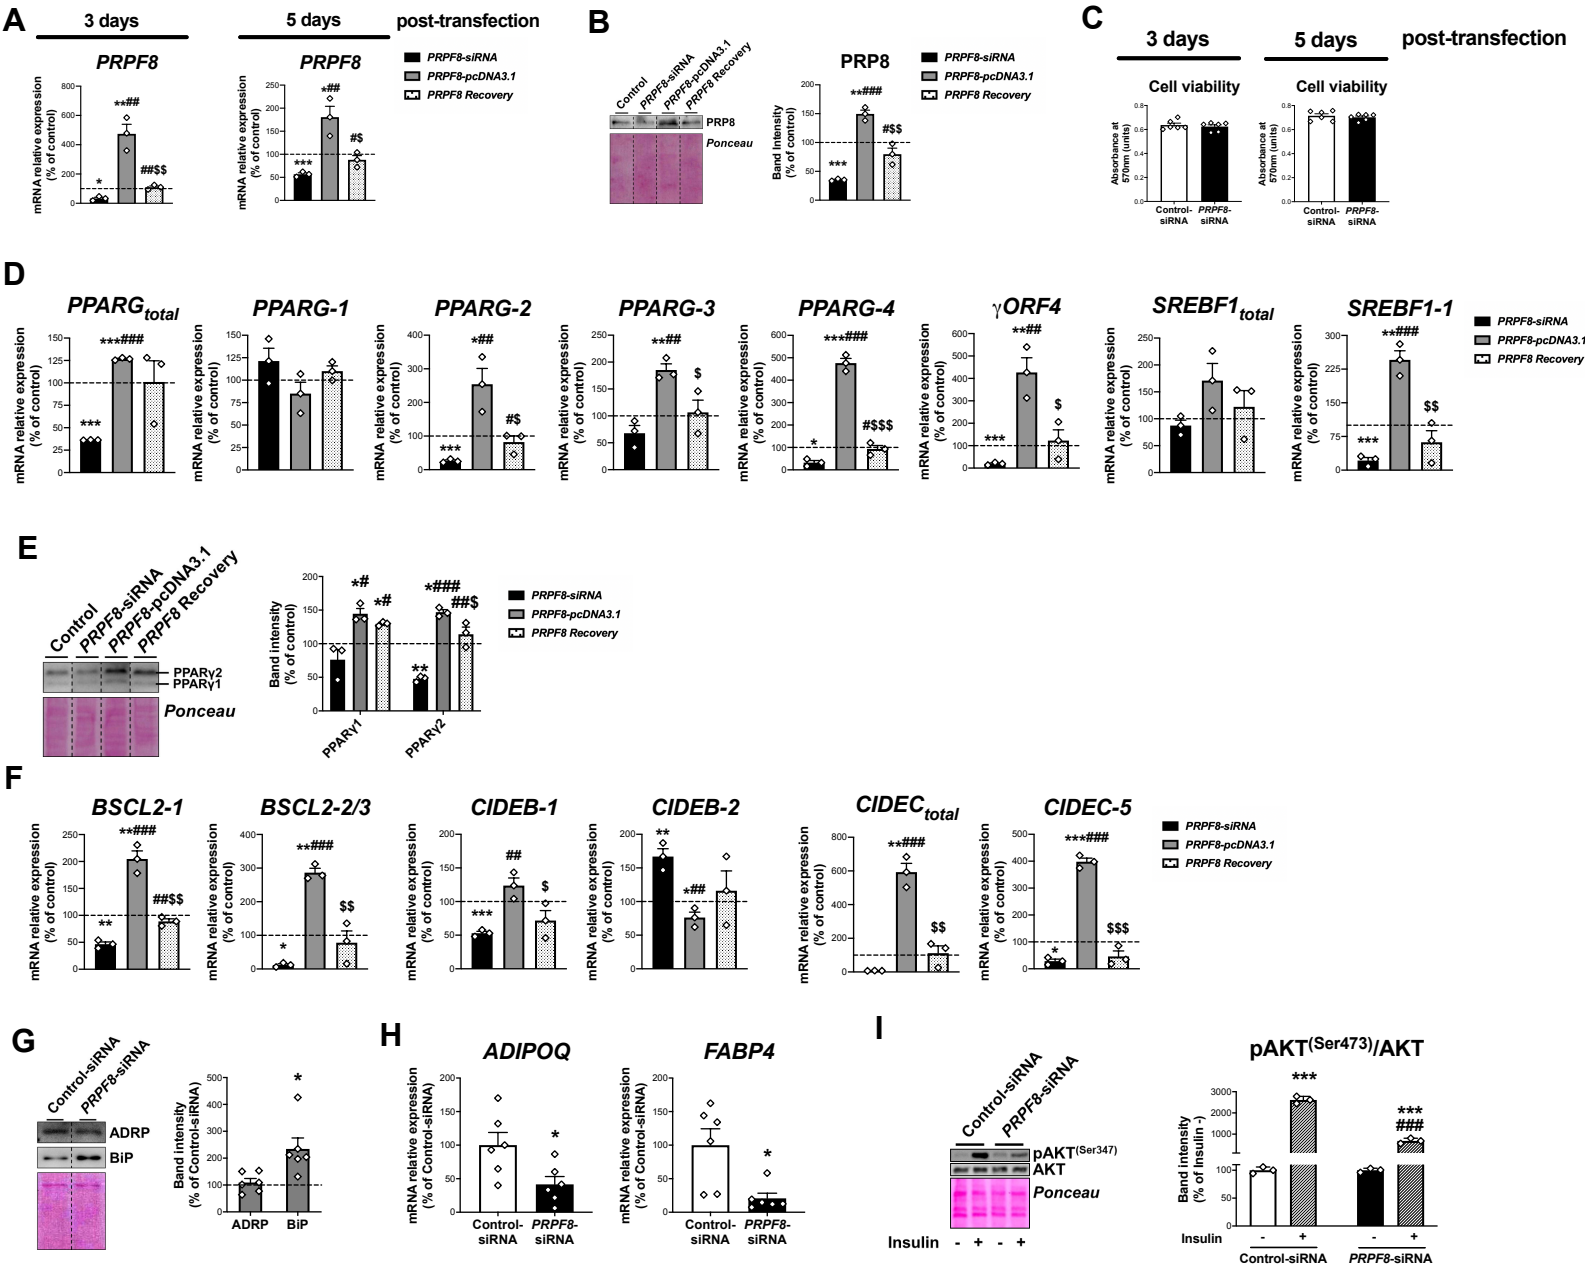

Supplement: supp [file elife_poa_e65996_Figure_3_figure_supplement_1.pdf › elife_poa_e65996_Figure_3_figure_supplement_1.pdf]

Figure 3—Figure supplement 2

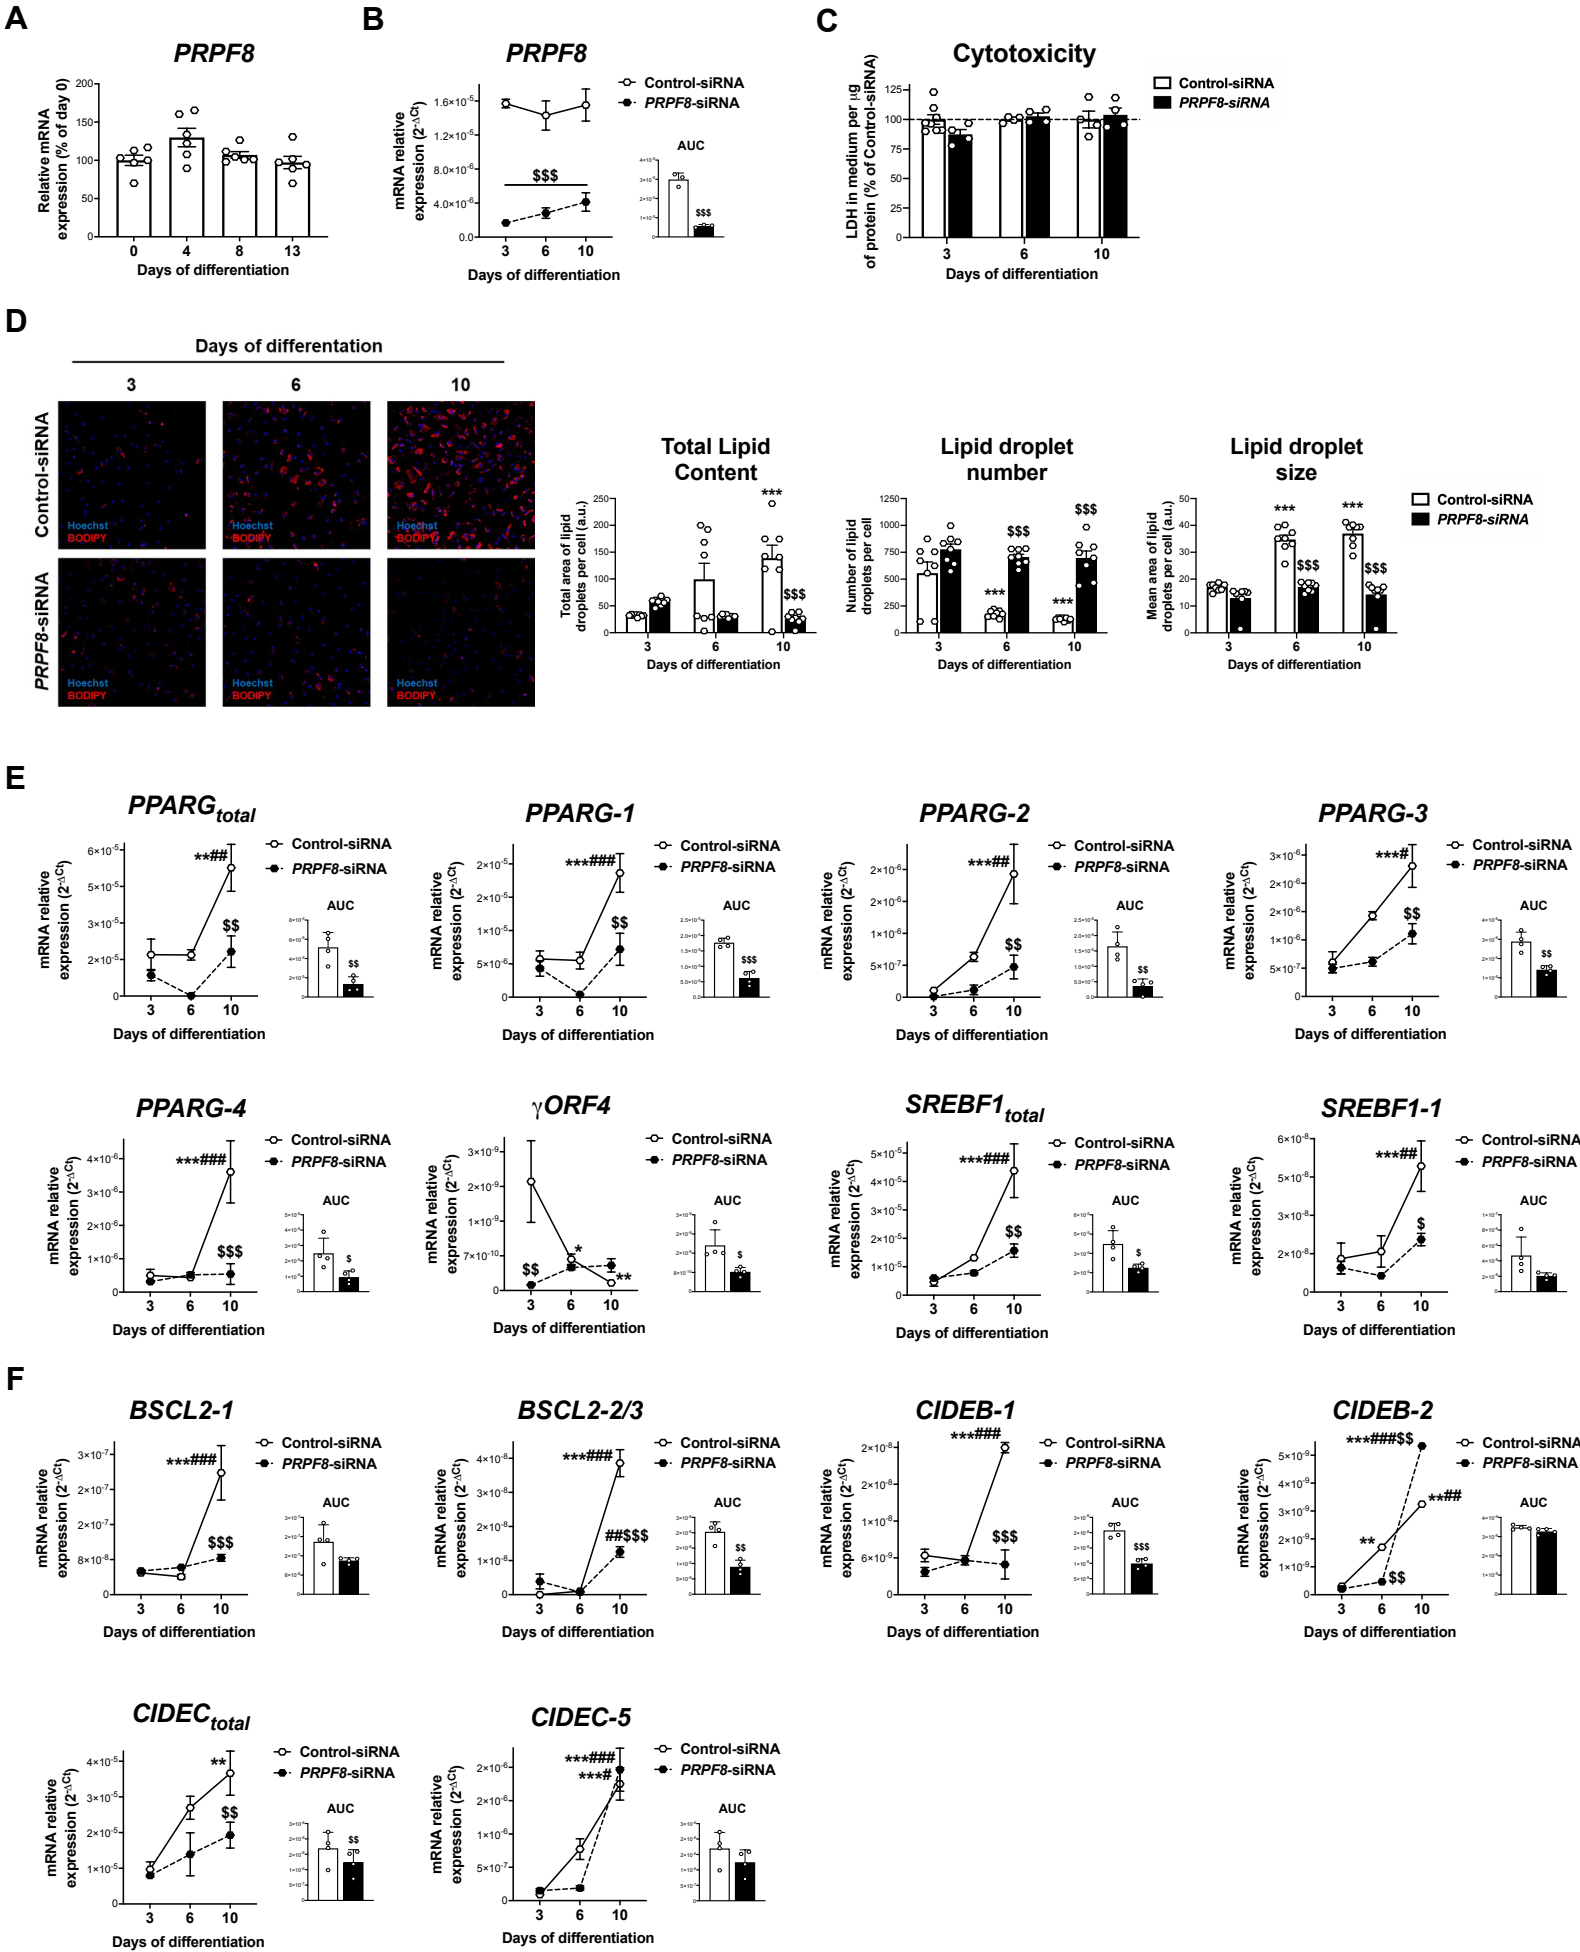

Supplement: supp [file elife_poa_e65996_Figure_3_figure_supplement_2.pdf › elife_poa_e65996_Figure_3_figure_supplement_2.pdf]

Figure 3 - Figure supplement 3

A

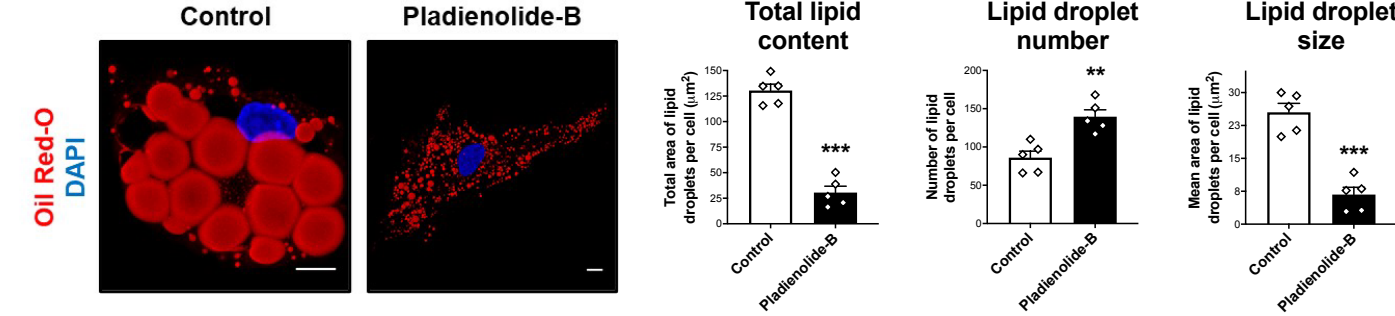

B

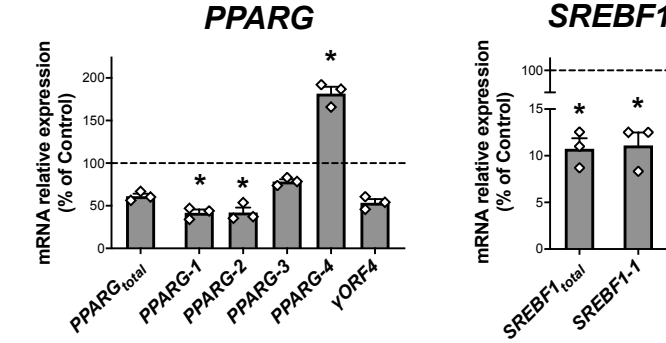

C

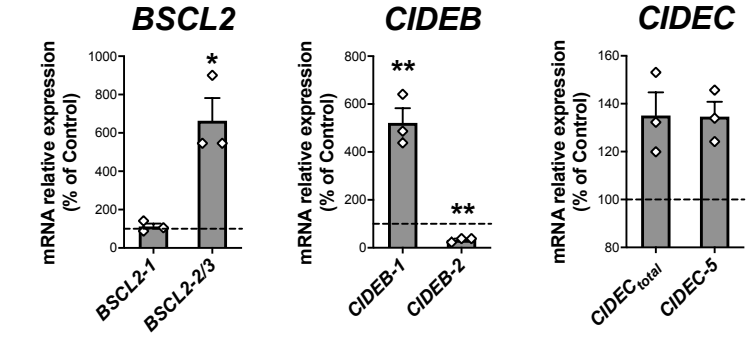

D

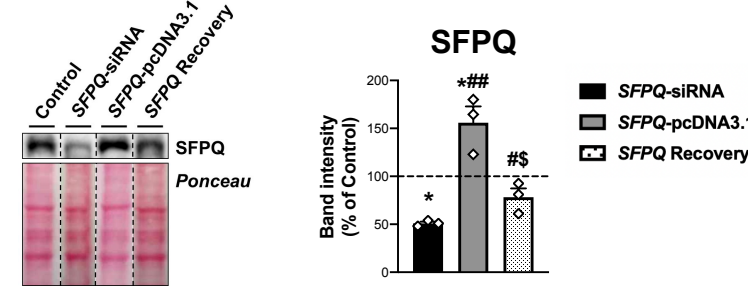

E

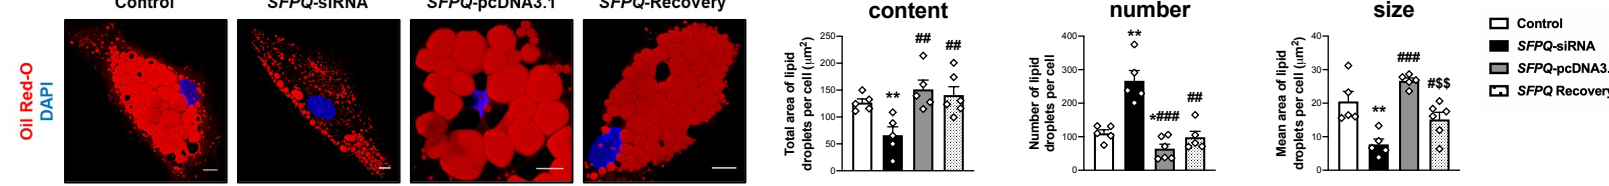

F

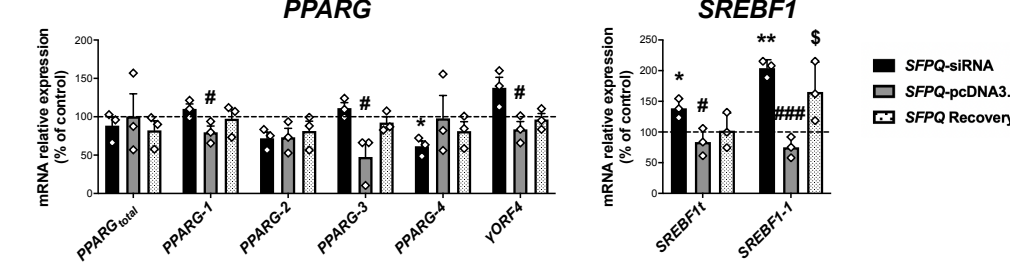

G

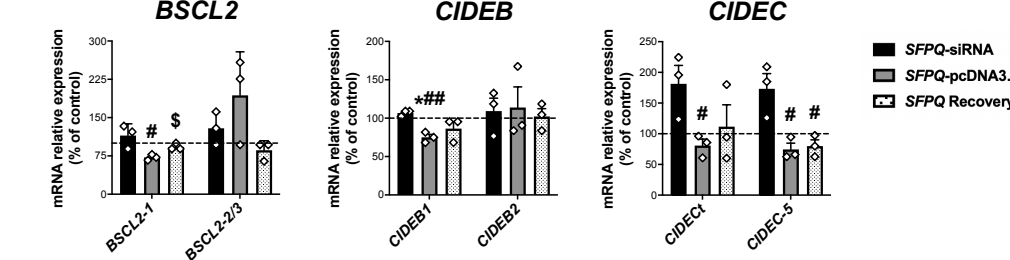

Supplement: supp [file elife_poa_e65996_Figure_3_figure_supplement_3.pdf › elife_poa_e65996_Figure_3_figure_supplement_3.pdf]

Figure 6—Figure supplement 1

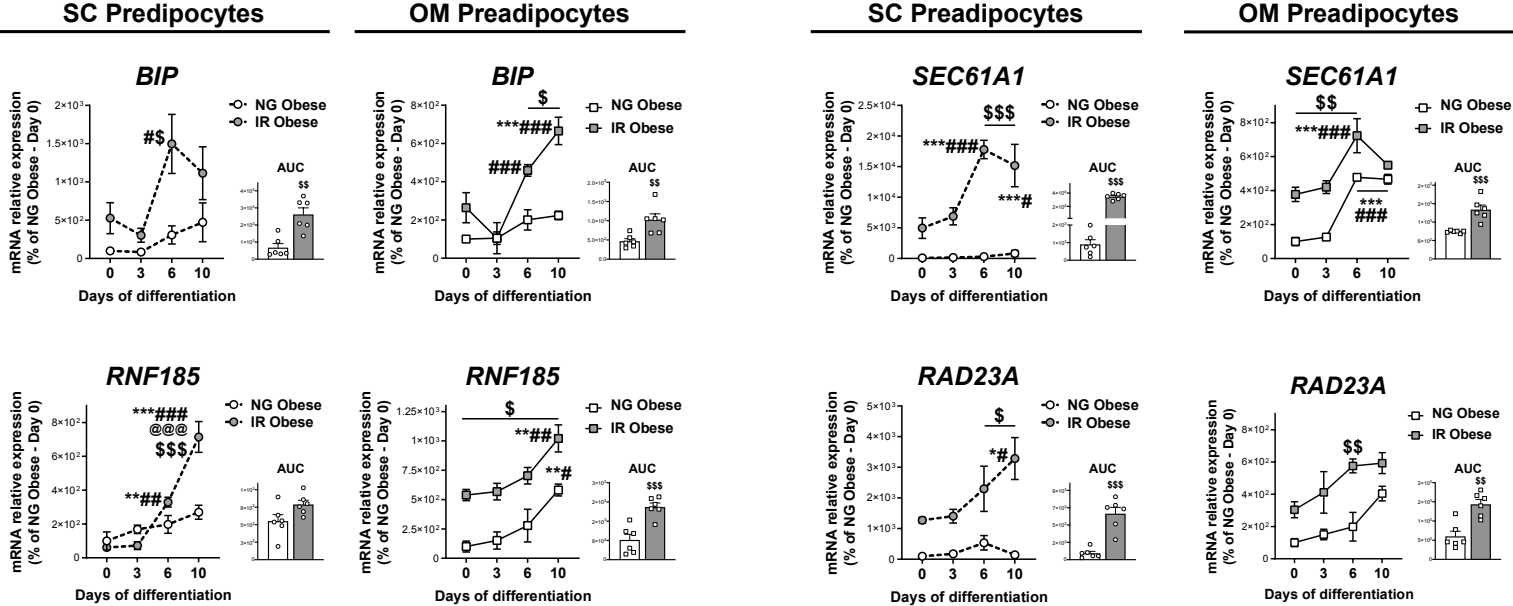

Supplement: supp [file elife_poa_e65996_Figure_6_figure_supplement_1.pdf › elife_poa_e65996_Figure_6_figure_supplement_1.pdf]

Figure 6—Figure supplement 2

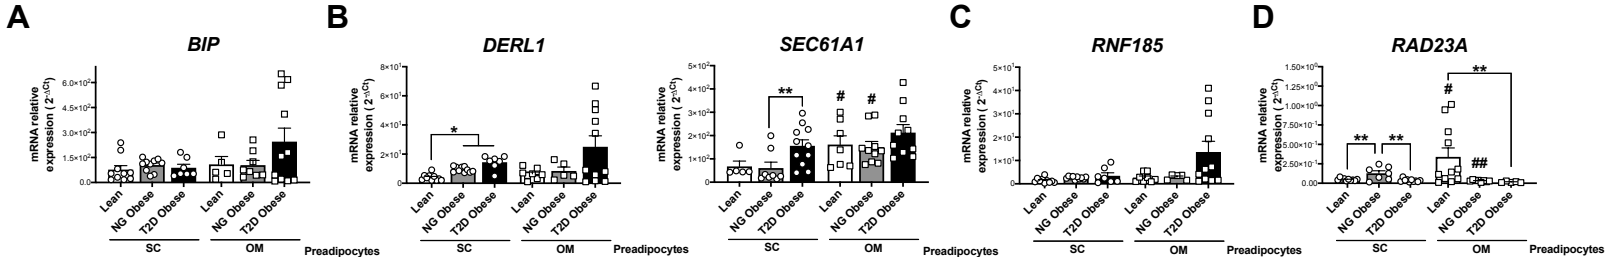

Supplement: supp [file elife_poa_e65996_Figure_6_figure_supplement_2.pdf › elife_poa_e65996_Figure_6_figure_supplement_2.pdf]

Figure 7—Figure supplement 1

A

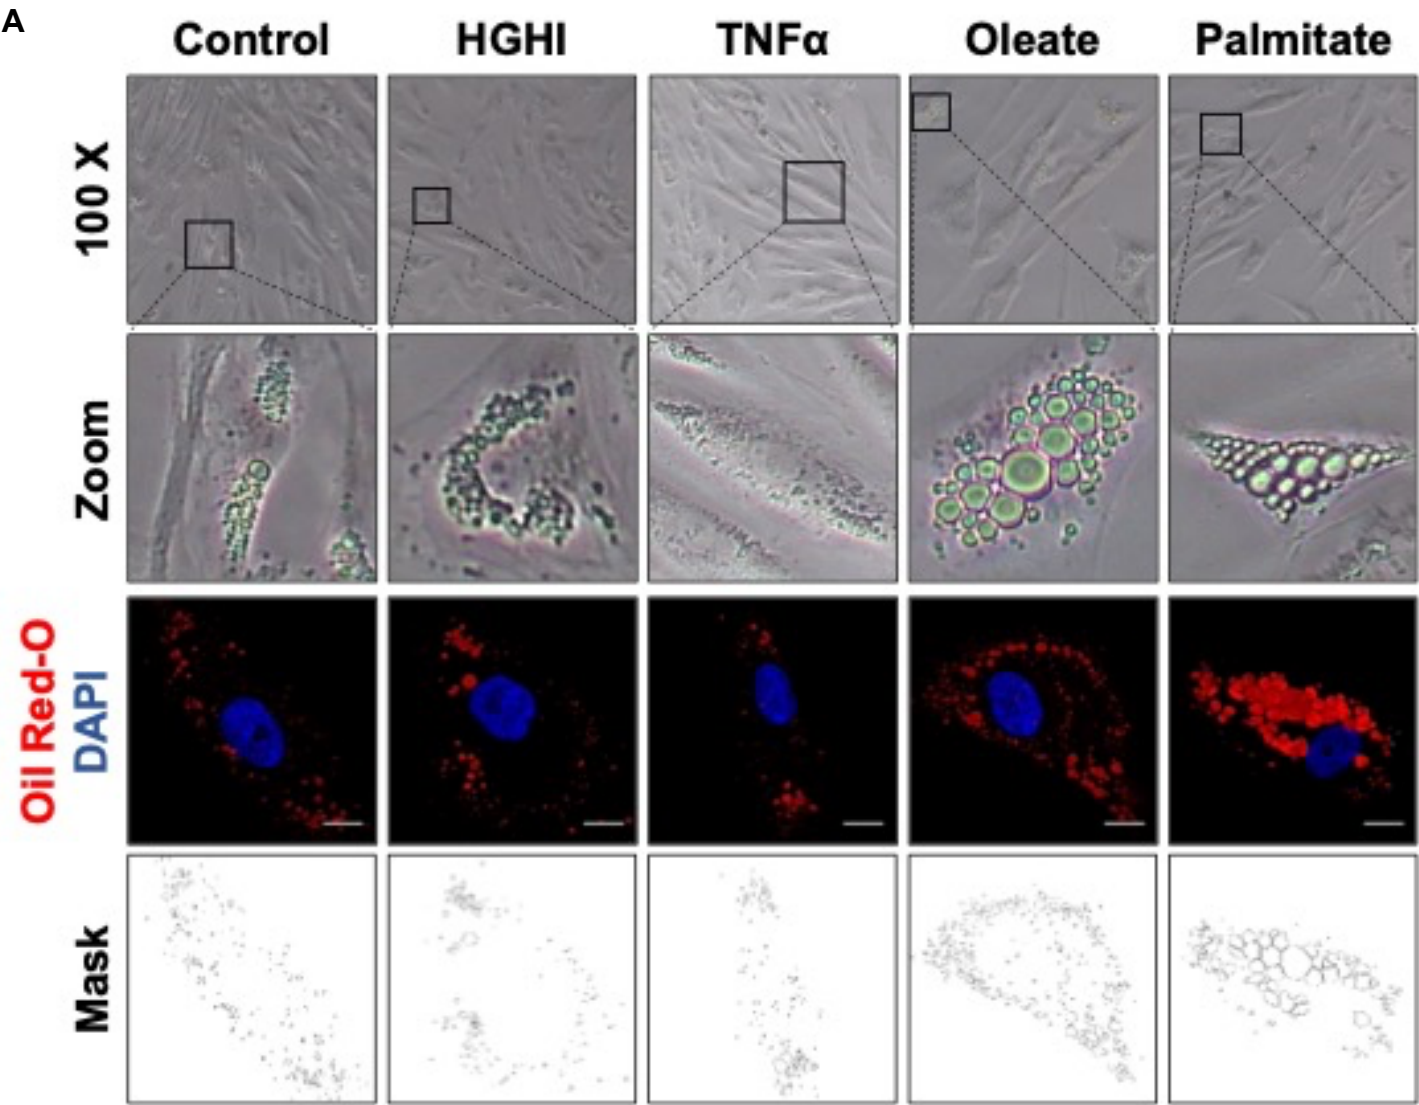

B

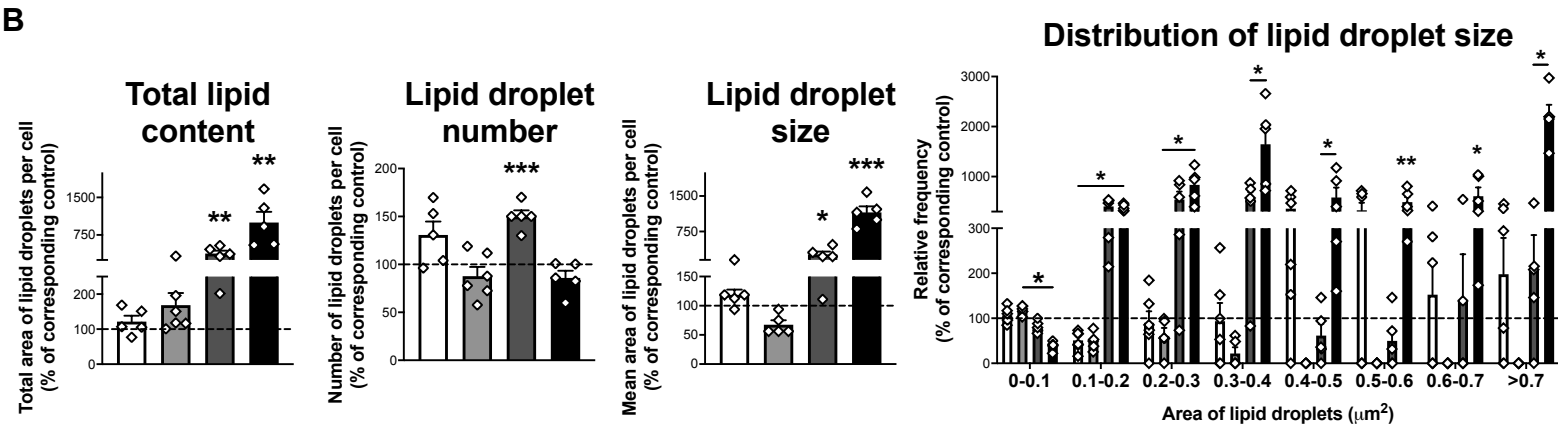

C

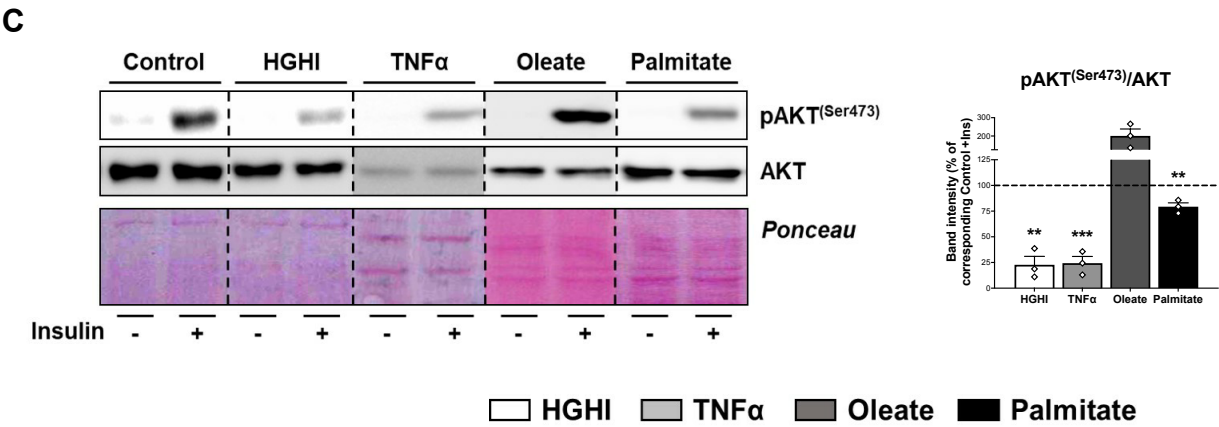

Supplement: supp [file elife_poa_e65996_Figure_7_figure_supplement_1.pdf › elife_poa_e65996_Figure_7_figure_supplement_1.pdf]

**Figure 7—Figure supplement 2**

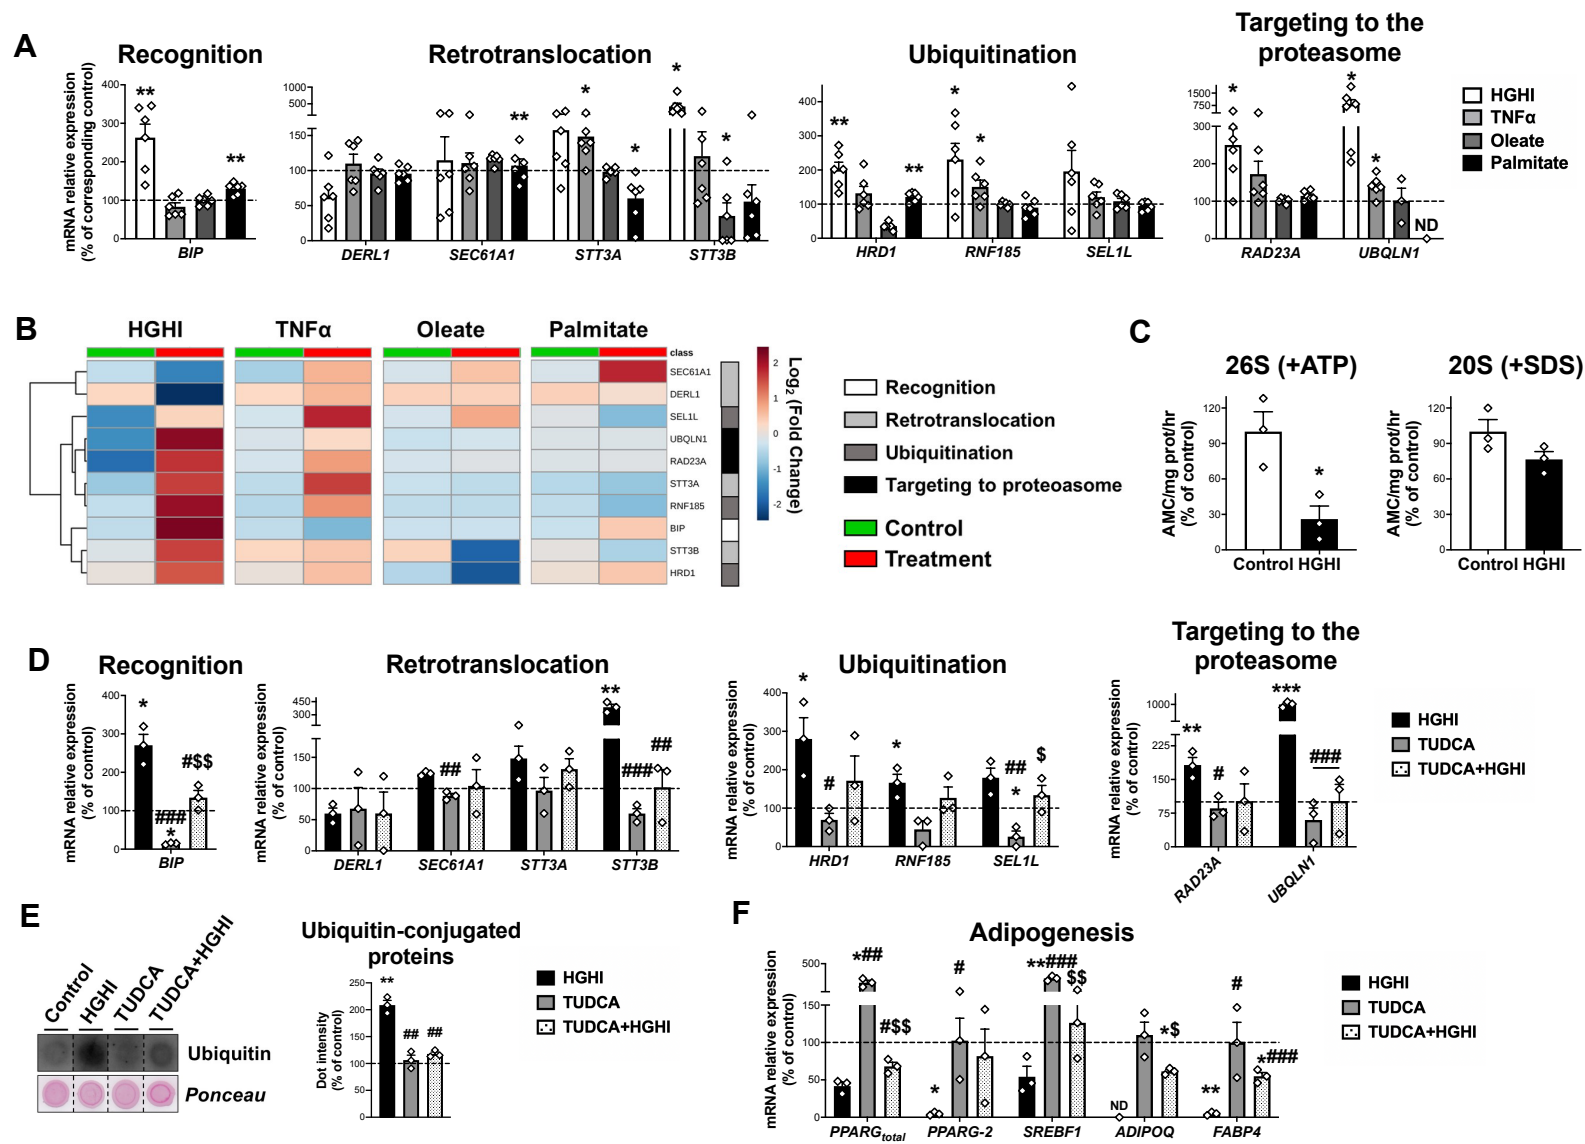

Supplement: supp [file elife_poa_e65996_Figure_7_figure_supplement_2.pdf › elife_poa_e65996_Figure_7_figure_supplement_2.pdf]

**Figure 7—Figure supplement 3**

**A**

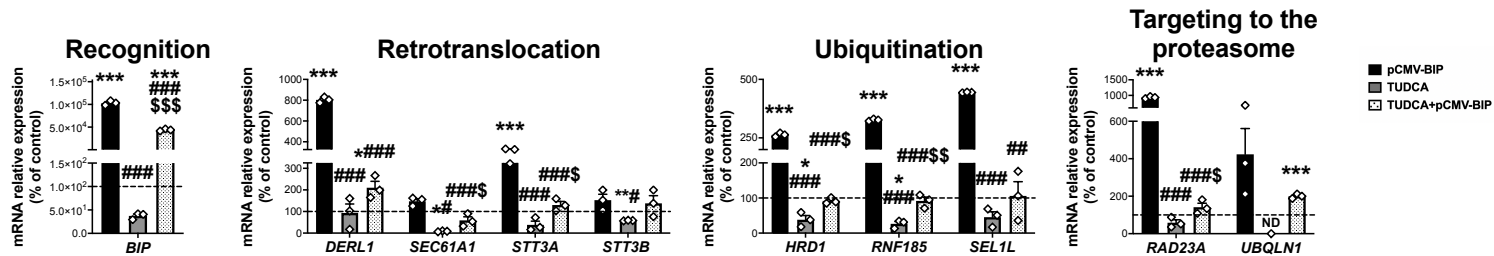

**B**

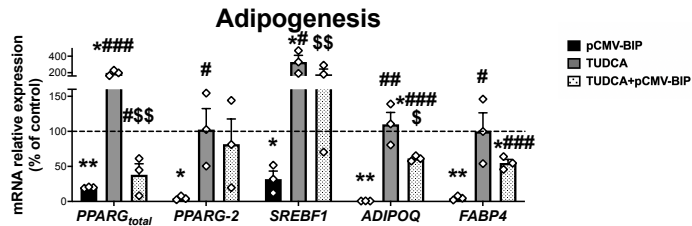

Supplement: supp [file elife_poa_e65996_Figure_7_figure_supplement_3.pdf › elife_poa_e65996_Figure_7_figure_supplement_3.pdf]
